# Supplementary material for: Isolable iodosylarene and iodoxyarene adducts of Co and their O-atom transfer and C–H activation reactivity
Source: PubMed Central journal article supplement — Chem Sci. 2018 Apr 23;9(19):4493–9. doi: 10.1039/c8sc01167b (PMC5958341; doi:10.1039/c8sc01167b), 2018-04-23
Supplement: SC-009-C8SC01167B-s001.pdf [file SC-009-C8SC01167B-s001.pdf]

## **Isolable Iodosylarene and Iodoxyarene Adducts of Co and Their O-atom Transfer and C-H Activation Reactivity**

Ethan A. Hill, Margaret L. Kelty, Alexander S. Filatov, and John S. Anderson\*

## Table of Contents

|                                                                                                                                                                          |     |
|--------------------------------------------------------------------------------------------------------------------------------------------------------------------------|-----|
| <b>1.0 Experimental Section</b>                                                                                                                                          | S4  |
| <b>1.1 Materials and Instrumentation</b>                                                                                                                                 | S4  |
| <b>1.2 Complex Synthesis and Characterization</b>                                                                                                                        | S4  |
| <b>2.0 Spectroscopic Data</b>                                                                                                                                            | S7  |
| <b>2.1 IR Spectra</b>                                                                                                                                                    | S7  |
| <b>Figure S1:</b> IR spectrum of <b>1</b> , KBr                                                                                                                          | S7  |
| <b>Figure S2:</b> IR spectrum of <b>2</b> , KBr                                                                                                                          | S7  |
| <b>Figure S3:</b> IR spectrum of <b>3</b> , KBr                                                                                                                          | S8  |
| <b>Figure S4:</b> IR spectrum of <b>4</b> , KBr                                                                                                                          | S8  |
| <b>Figure S5:</b> IR spectrum of <b>5</b> , KBr                                                                                                                          | S9  |
| <b>2.2 UV-vis Spectra</b>                                                                                                                                                | S10 |
| <b>Figure S6:</b> UV-vis spectra of <b>1-5</b>                                                                                                                           | S10 |
| <b>2.3 NMR Spectra</b>                                                                                                                                                   | S11 |
| <b>Figure S7:</b> <sup>1</sup> H NMR spectrum of <b>1</b>                                                                                                                | S11 |
| <b>Figure S8:</b> <sup>1</sup> H NMR spectrum of <b>2</b>                                                                                                                | S12 |
| <b>Figure S9:</b> <sup>1</sup> H NMR spectrum of <b>3</b>                                                                                                                | S13 |
| <b>Figure S10:</b> <sup>1</sup> H and <sup>19</sup> F NMR spectra of <b>4</b>                                                                                            | S14 |
| <b>Figure S11:</b> <sup>1</sup> H and <sup>19</sup> F NMR spectra of <b>5</b>                                                                                            | S15 |
| <b>Figure S12:</b> <sup>1</sup> H NMR spectrum of the self-decay of <b>1</b> in CD <sub>2</sub> Cl <sub>2</sub> over 24 h                                                | S16 |
| <b>Figure S13:</b> <sup>1</sup> H NMR spectrum of the self-decay of <b>2</b> in CDCl <sub>3</sub> over 24 h                                                              | S17 |
| <b>Figure S14:</b> <sup>1</sup> H and <sup>31</sup> P NMR spectra of the reaction of <b>1</b> in CDCl <sub>3</sub> with PMe <sub>3</sub>                                 | S18 |
| <b>Figure S15:</b> <sup>1</sup> H and <sup>31</sup> P NMR spectra of the reaction of <b>2</b> and <b>3</b> in CDCl <sub>3</sub> with PPh <sub>3</sub>                    | S19 |
| <b>Figure S16:</b> <sup>1</sup> H NMR spectrum of independently prepared [CoTp <sup>tBu</sup> (OPPh <sub>3</sub> )](BAR <sup>F</sup> <sub>4</sub> ) in CDCl <sub>3</sub> | S20 |
| <b>Figure S17:</b> <sup>1</sup> H NMR spectrum of the reaction of <b>2</b> and <b>3</b> in CDCl <sub>3</sub> with thioanisole                                            | S21 |
| <b>Figure S18:</b> <sup>1</sup> H NMR spectrum of independently prepared [CoTp <sup>tBu</sup> (PhSOMe)](BAR <sup>F</sup> <sub>4</sub> ) in CDCl <sub>3</sub>             | S22 |
| <b>Figure S19:</b> <sup>1</sup> H NMR spectrum of the reaction of <b>3</b> with 20 equivalents of <sup>s</sup> PhI                                                       | S23 |
| <b>Figure S20:</b> <sup>1</sup> H NMR spectrum of the crystals of <b>6</b> obtained from reaction of <b>1</b> with ScOTf <sub>3</sub>                                    | S24 |
| <b>2.4 EPR Spectra</b>                                                                                                                                                   | S25 |
| <b>Figure S21:</b> Complex <b>1</b>                                                                                                                                      | S25 |
| <b>Figure S22:</b> Complex <b>2</b>                                                                                                                                      | S26 |
| <b>Figure S23:</b> Complex <b>3</b>                                                                                                                                      | S27 |
| <b>Figure S24:</b> Complex <b>4</b>                                                                                                                                      | S28 |
| <b>Figure S25:</b> Complex <b>5</b>                                                                                                                                      | S29 |
| <b>Figure S26:</b> Complex <b>6</b>                                                                                                                                      | S30 |
| <b>2.5 Mass Spectra</b>                                                                                                                                                  | S31 |
| <b>Figure S27:</b> Self-decay of <b>1</b>                                                                                                                                | S31 |
| <b>Figure S28:</b> Self-decay of <b>2</b>                                                                                                                                | S32 |
| <b>Figure S29:</b> Self-decay of <b>3</b>                                                                                                                                | S33 |
| <b>Figure S30:</b> Reaction mixture of <b>1</b> with 10 equiv Sc <sup>3+</sup>                                                                                           | S34 |
| <b>2.6 Electrochemistry</b>                                                                                                                                              | S35 |
| <b>Figure S31:</b> Cyclic voltammetry of <b>1</b> and <b>2</b>                                                                                                           | S35 |
| <b>3.0 Kinetic Experiments</b>                                                                                                                                           | S36 |
| <b>3.1 General Procedure</b>                                                                                                                                             | S36 |
| <b>3.2 Kinetic Plots</b>                                                                                                                                                 | S37 |
| <b>Figure S32:</b> Observed rate data for complex <b>1</b> with various substrates                                                                                       | S37 |
| <b>Figure S33:</b> Representative UV-vis decay of <b>2</b> used for rate calculations                                                                                    | S38 |
| <b>Figure S34:</b> Observed rate data for complex <b>2</b> with various substrates                                                                                       | S39 |

|                                                                                                                              |     |
|------------------------------------------------------------------------------------------------------------------------------|-----|
| <b>Figure S35:</b> Determination of $k_2$ for reaction of <b>2</b> with DHA                                                  | S40 |
| <b>Figure S36:</b> $^1\text{H}$ NMR spectrum of the decay of <b>3</b> in $\text{CDCl}_3$ and representative overlay vs. time | S41 |
| <b>Figure S37:</b> Observed rate data for complex <b>3</b> with various substrates                                           | S42 |
| <b>Figure S38:</b> Determination of $k_2$ for reaction of <b>3</b> with DHA                                                  | S43 |
| <b>Figure S39:</b> Background reaction of $^s\text{PhIO}$ with DHA and thioanisole                                           | S44 |
| <b>3.3 Kinetic Isotope Effects</b>                                                                                           | S45 |
| <b>Figure S40:</b> Representative MS data for the KIE of <b>1</b>                                                            | S45 |
| <b>Table S1:</b> KIE values for <b>1</b> , <b>2</b> , <b>3</b> , and $^s\text{PhIO}$                                         | S46 |
| <b>Table S2:</b> Minimum KIE values for <b>1</b> , <b>2</b> , <b>3</b> , and $^s\text{PhIO}$                                 | S47 |
| <b>Table S3:</b> KIE values for $^s\text{PhIO}$ with $\text{Sc}^{3+}$ and $\text{Na}^+$                                      | S48 |
| <b>Table S4:</b> Minimum KIE values for $^s\text{PhIO}$ with $\text{Sc}^{3+}$ and $\text{Na}^+$                              | S49 |
| <b>4.0 X-ray Crystallography</b>                                                                                             | S50 |
| <b>4.1 General Experimental</b>                                                                                              | S50 |
| <b>4.2 Structures</b>                                                                                                        | S51 |
| <b>Figure S41:</b> Solid state structure of <b>3</b> with THF interaction shown                                              | S51 |
| <b>Figure S42:</b> Solid state structure of <b>4</b>                                                                         | S52 |
| <b>Figure S43:</b> Solid state structure of <b>5</b>                                                                         | S53 |
| <b>Figure S44:</b> Solid state structure of <b>6</b>                                                                         | S54 |
| <b>4.3 Metrical Parameters</b>                                                                                               | S55 |
| <b>Table S5:</b> X-ray crystal data for <b>1-6</b>                                                                           | S55 |
| <b>4.4 Refinement Details</b>                                                                                                | S56 |
| <b>Table S6:</b> For complex <b>1</b>                                                                                        | S56 |
| <b>Table S7:</b> For complex <b>2</b>                                                                                        | S57 |
| <b>Table S8:</b> For complex <b>3</b>                                                                                        | S58 |
| <b>Table S9:</b> For complex <b>4</b>                                                                                        | S59 |
| <b>Table S10:</b> For complex <b>5</b>                                                                                       | S60 |
| <b>Table S11:</b> For complex <b>6</b>                                                                                       | S61 |
| <b>5.0 References</b>                                                                                                        | S62 |

## 1.0 Experimental Section

### 1.1 Materials and Instrumentation

All manipulations were carried out under a dry N<sub>2</sub> atmosphere using either standard Schlenk technique or in an mBraun Unilab Pro glove box. All chemicals obtained from commercial sources and used as received unless otherwise stated. Solvents were dried on a solvent purification system from Pure Process Technologies before storing over 4Å molecular sieves under N<sub>2</sub>. Tetrahydrofuran (THF) was stirred over NaK alloy and passed through a column of activated alumina prior to storing over 4Å sieves under N<sub>2</sub>. Iodosylbenzene, Na[TP<sup>Ad,Me</sup>], NaBAr<sup>F</sup><sub>4</sub>, Co(MeCN)<sub>6</sub>OTf<sub>2</sub>, and d<sub>4</sub>-DHA were prepared following literature procedures.<sup>[1-5]</sup> Synthesis of K[TP<sup>tBu</sup>] followed a literature procedure for the synthesis of Li[TP<sup>tBu</sup>] substituting KBH<sub>4</sub> for LiBH<sub>4</sub>, all other synthetic procedures were followed as reported.<sup>[6]</sup>

The iodoxyarene, <sup>s</sup>PhIO<sub>2</sub>, was prepared by allowing a concentrated solution of <sup>s</sup>PhIO (300 mg, 0.88 mmol) in 10 mL of DCM to stir until the yellow color had dissipated, approximately three days. The resulting white precipitate was collected by filtration and washed several times with cold DCM and Et<sub>2</sub>O before drying under vacuum to yield a white powder (212 mg, 67%). The spectroscopic features of this material matched a previous literature report.<sup>[7]</sup>

UV-vis spectra were recorded on either a Thermo Scientific Evolution 300 spectrometer with the VISIONpro software suite or a Cary 5000 UV/Vis/IR UMA spectrophotometer located in the UChicago MRSEC Materials Preparation and Measurement Laboratory. IR spectra were recorded on a Bruker Tensor II spectrometer with the OPUS software suite. All IR samples were prepared as KBr pellets in a homemade press. EPR spectra were recorded on a Bruker Elexsys E500 spectrometer with an Oxford ESR 900 X-band cryostat and a Bruker Cold-Edge Stinger. NMR spectra for <sup>1</sup>H, <sup>19</sup>F, and <sup>31</sup>P{<sup>1</sup>H} were recorded on either Bruker DRX-400 or AVANCE-500 spectrometers. Integrations of paramagnetic species are relative only to paramagnetic peaks, therefore in reported spectra below, resonances from diamagnetic protons, such as BAr<sup>F</sup><sub>4</sub> counter ions, were not given integral values. Combustion analysis performed by Midwest Microlab. Mass spectra were recorded on an Agilent 6130 ESI LC-MS by direct injection. Organic products identified by GC-MS using an Agilent 7890B GC equipped with an Agilent HP-5MS column coupled to an Agilent 5977A EI-MS. Isotope patterns compared to the NIST library to confirm assignments.

### 1.2 Complex Synthesis and Characterization

**[CoTP<sup>Ad,Me</sup>(<sup>s</sup>PhIO)][BAr<sup>F</sup><sub>4</sub>] (1).** To a solution of **4** (50 mg, 0.058 mmol) in 6 mL of Et<sub>2</sub>O was added NaBAr<sup>F</sup><sub>4</sub> (54 mg, 0.061 mmol) followed by <sup>s</sup>PhIO (21 mg, 0.060 mmol). This mixture was allowed to stir for ~15 min before filtering through Celite. The resulting blue solution was then layered under petroleum ether in several portions before placing in a -35 °C freezer for several days to afford blue clumps of crystalline material (78 mg, 76%). Single crystals were grown by slow diffusion of petroleum ether into a concentrated solution in DCM at -35 °C over several days. UV-vis, nm in Et<sub>2</sub>O 25 °C ( $\epsilon$ , M<sup>-1</sup>cm<sup>-1</sup>): 572 (330), 634 (610), 652 (580), and 995 (120). IR (cm<sup>-1</sup>): 2909 (s), 2855 (m), 2564 (m,  $\nu_{B-H}$ ), 1875 (w), 1835 (w), 1781 (w), 1656 (m), 1544 (s), 1479 (m), 1452 (m), 1425 (m), 1355 (m), 1280 (m), 1182 (m), 1130 (m), 939 (m), 887 (m), 840 (m), 792 (m), 748 (m), 715 (w), 680 (m), 667 (m), 642 (m). <sup>1</sup>H NMR (CDCl<sub>3</sub>, 400 MHz):  $\delta$  78.00 (s, 3H), 18.86 (d, 1H), 18.37 (s, 9H), 14.61 (s, 1H), 10.06 (s, 1H), 7.75 (s, BAr<sup>F</sup><sub>4</sub>), 7.57 (s, BAr<sup>F</sup><sub>4</sub>), 6.09 (br, 18H), 2.77 (s, 9H), 2.44 (s, 9H), 1.51 (s, 9H), 0.80 (s, 9H). <sup>19</sup>F NMR (CDCl<sub>3</sub>, 470 MHz):  $\delta$  -62.6. Anal. Calc. for C<sub>84</sub>H<sub>83</sub>N<sub>6</sub>O<sub>3</sub>SB<sub>2</sub>F<sub>24</sub>ICo: C 52.55, H 4.36, N 4.38, Found: C 52.37, H 4.43, N 4.08.

**[CoTP<sup>tBu</sup>(<sup>s</sup>PhIO)][BAr<sup>F</sup><sub>4</sub>] (2).** To a solution of **5** (40 mg, 0.068 mmol) in 6 mL of Et<sub>2</sub>O was added NaBAr<sup>F</sup><sub>4</sub> (66.2 mg, 0.075 mmol) and <sup>s</sup>PhIO (25.4 mg, 0.075 mmol). After 20 minutes of stirring the blue solution was filtered through Celite and dried under vacuum. The resulting blue solid was redissolved in DCM before filtering through Celite to remove insoluble material and dried under vacuum once more. Finally, the blue residue was washed three times with petroleum ether and dried under vacuum to yield a blue powder (93 mg, 83%) which could be used without further purification. Single crystals suitable for X-ray diffraction were grown from a concentrated Et<sub>2</sub>O solution layered with hexamethyldisylloxane and stored

at  $-35\text{ }^{\circ}\text{C}$  for 7 days. UV-vis, nm in  $\text{Et}_2\text{O}$ ,  $25\text{ }^{\circ}\text{C}$  ( $\epsilon$ ,  $\text{M}^{-1}\text{cm}^{-1}$ ): 576 (350), 634 (700), 652 (680), 946 (96). IR ( $\text{cm}^{-1}$ ): 3156 (m), 2970 (s), 2876 (w), 2498 (w,  $\nu_{\text{B-H}}$ ), 1660 (w), 1611 (m), 1503 (m), 1398 (m), 1355 (s), 1279 (s), 1127 (s), 932 (m), 887 (m), 714 (m).  $^1\text{H}$  NMR ( $\text{CDCl}_3$ , 500 MHz):  $\delta$  77.53 (s, 3H), 31.03 (s, 3H), 16.61 (s, 1H), 7.89 (br, 1H), 7.67 (s,  $\text{BAR}^{\text{F}_4}$ ), 7.47 (s,  $\text{BAR}^{\text{F}_4}$ ), 6.50 (br, 1H), 6.00 (br, 27H), 0.77 (s, 9H),  $-6.45$  (br, 1H),  $-10.01$  (br, 1H).  $^{19}\text{F}$  NMR ( $\text{CDCl}_3$ , 470 MHz):  $\delta$   $-62.6$ . Anal. Calc. for  $\text{C}_{63}\text{H}_{59}\text{B}_2\text{CoF}_{24}\text{IN}_6\text{O}_3\text{S}$ : C 46.04, H 3.62, N 5.11. Found: C 46.06, H 3.74, N 4.93.

**[CoTp<sup>tBu</sup>(<sup>s</sup>PhIO<sub>2</sub>)] [BAR<sup>F</sup><sub>4</sub>] (3).** To a solution of **5** (73 mg, 0.12 mmol) in 6 mL of  $\text{Et}_2\text{O}$  was added  $\text{NaBAR}^{\text{F}_4}$  (116 mg, 0.13 mmol) and <sup>s</sup>PhIO<sub>2</sub> (47 mg, 0.13 mmol). After 20 minutes of stirring, the blue solution was filtered through Celite and dried under vacuum. The resulting blue residue was redissolved in minimal DCM and filtered once more through Celite to remove insoluble material before drying under vacuum to yield a blue powder (138 mg, 67%) which could be used without further purification. Single crystals of **3** were grown from a concentrated solution of diethyl ether layered beneath petroleum ether at  $-35\text{ }^{\circ}\text{C}$  over several days. UV-vis, nm in  $\text{Et}_2\text{O}$ ,  $25\text{ }^{\circ}\text{C}$  ( $\epsilon$ ,  $\text{M}^{-1}\text{cm}^{-1}$ ): 580 (sh, 530), 635 (820), 950 (140). IR data ( $\text{cm}^{-1}$ ): 3159 (m), 2972 (m), 2500 (w,  $\nu_{\text{B-H}}$ ), 1661 (w), 1612 (w), 1504 (m), 1399 (m), 1355 (s), 1279 (s), 1127 (s), 1029 (m), 713 (m).  $^1\text{H}$  NMR ( $\text{CDCl}_3$ , 500 MHz):  $\delta$  82.85 (s, 3H), 20.38 (s, 3H), 10.89 (s, 1H), 9.81 (br, 27H), 7.48 (s,  $\text{BAR}^{\text{F}_4}$ ), 7.31 (s,  $\text{BAR}^{\text{F}_4}$ ), 6.41 (s, 1H), 3.74 (s, 1H),  $-5.11$  (s, 1H),  $-23.69$  (br, 1H).  $^{19}\text{F}$  NMR ( $\text{CDCl}_3$ , 470 MHz):  $\delta$   $-62.6$ . Anal. Calc. for  $\text{C}_{63}\text{H}_{59}\text{B}_2\text{CoF}_{24}\text{IN}_6\text{O}_4\text{S}$ : C 45.59, H 3.58, N 5.06, Found: C 45.57, H 3.59, N 5.04.

**[CoTp<sup>Ad,Me</sup>(OTf)] (4).** To a solution of  $[\text{NaTp}^{\text{Ad,Me}}]$  (500 mg, 0.73 mmol) in 20 mL of DCM was added  $\text{Co}(\text{MeCN})_6(\text{OTf})_2$  (445 mg, 0.74 mmol). The mixture was allowed to stir for 24 h before filtering through a fine fritted glass funnel to remove insoluble materials and yield a deep blue solution. The volatiles were removed *in vacuo* and the resulting blue residue was taken up in boiling petroleum ether with minimal THF (~5 mL, 9:1 ratio of petroleum ether to THF) before filtering hot through Celite. The resulting solution was cooled to room temperature whereupon dark blue crystals began to form. After cooling, crystallization was driven to near completion by storing in a  $-35\text{ }^{\circ}\text{C}$  freezer overnight. The supernatant was then decanted away from the crop of blue crystals which were rinsed with cold petroleum ether before drying *in vacuo* to obtain dark blue crystalline material (480 mg, 76%). Single crystals suitable for X-ray diffraction were grown from slow diffusion of petroleum ether into a concentrated THF solution at  $-35\text{ }^{\circ}\text{C}$  over the course of several days. UV-vis, nm in DCM  $25\text{ }^{\circ}\text{C}$  ( $\epsilon$  in  $\text{M}^{-1}\text{cm}^{-1}$ ): 512 (sh, 90), 546 (260), 556 (270), 620 (420), 630 (400), and 1030 (70). IR ( $\text{cm}^{-1}$ ): 2910 (s), 2850 (m), 2564 (m,  $\nu_{\text{B-H}}$ ), 1653 (m), 1546 (s), 1427 (m), 1342 (m), 1230 (m), 1200 (m), 1098 (m), 1067 (m), 1014 (m), 862 (m), 791 (m), 750 (m), 682 (m), 631 (m).  $^1\text{H}$  NMR ( $\text{CDCl}_3$ , 400 MHz):  $\delta$  79.0 (3H), 15.9 (9H), 8.2 (18H), 2.9 (9H), 2.2 (9H), 0.0 (9H),  $-4.5$  (1H).  $^{19}\text{F}$  NMR ( $\text{CDCl}_3$ , 470 MHz):  $\delta$   $-7.4$ . Anal. Calc. for  $\text{C}_{43}\text{H}_{58}\text{N}_6\text{O}_3\text{F}_3\text{BSCo}$ : C 59.65, H 6.75, N 9.71, Found: C 59.92, H 6.74, N 9.03. Anal. Calc. for  $\text{C}_{47}\text{H}_{66}\text{N}_6\text{O}_4\text{F}_3\text{BSCo}$  (one additional molecule of THF included): C 60.19, H 7.09, N 8.96, Found: C 59.90, H 6.77, N 8.58. Elemental analysis for **4** is slightly but consistently off from the predicted value for the molecular formula. We believe that this variability may be due to solvent inclusion from crystallization. As can be seen, the experimental values match well with those predicted for a mono-THF solvate.

**[CoTp<sup>tBu</sup>OTf] (5).** To a solution of  $[\text{Tp}^{\text{tBu}}]$  (400 mg, 0.95 mmol) in 18 mL DCM was added  $\text{Co}(\text{MeCN})_6\text{OTf}_2$  (574 mg, 0.95 mmol). After stirring for 24 hours, the reaction was filtered through a medium fritted glass funnel and the resulting blue filtrate was dried under vacuum. The residue was dissolved in boiling petroleum ether and THF mixture and filtered hot before being cooled to room temperature and stored at  $-35\text{ }^{\circ}\text{C}$  for one day to yield microcrystalline product (357 mg, 64%). Single crystals suitable for X-ray diffraction were grown from a concentrated  $\text{Et}_2\text{O}$  solution layered with petroleum ether and stored at  $-35\text{ }^{\circ}\text{C}$  for two days. UV-vis, nm in  $\text{Et}_2\text{O}$   $25\text{ }^{\circ}\text{C}$  ( $\epsilon$ ,  $\text{M}^{-1}\text{cm}^{-1}$ ): 574 (330), 616 (580), 956 (70). IR ( $\text{cm}^{-1}$ ): 3137 (m), 2967 (s), 2869 (m), 2516 (w,  $\nu_{\text{B-H}}$ ), 1636 (w), 1503 (s), 1396 (s), 1258 (s), 1194 (s), 1170 (m), 1058 (m), 1033 (m), 788 (m), 735 (m), 639 (m).  $^1\text{H}$  NMR ( $\text{CDCl}_3$ , 500 MHz):  $\delta$  79.91 (s,

3H), 23.64 (s, 3H), 9.79 (br, 27H), -21.07 (br, 1H).  $^{19}\text{F}$  NMR ( $\text{CDCl}_3$ , 470 MHz):  $\delta$  -30.0 (s). Anal. Calc. for  $\text{C}_{22}\text{H}_{34}\text{BCoF}_3\text{N}_6\text{O}_3\text{S}$ : C 44.84, H 5.82, N 14.26. Found: C 44.79, H 5.73, N 14.27.

**[CoTp<sup>Ad,Me</sup>H(pyr<sup>Ad,Me</sup>)OTf][BAr<sup>F</sup><sub>4</sub>] (6).** To a solution of **1** (25 mg, 0.013 mmol) in 3 mL of Et<sub>2</sub>O was added ScOTf<sub>3</sub> (64 mg, 0.13 mmol). The suspension was stirred overnight during which time a purple solution formed which was filtered through Celite and layered under petroleum ether at -35 °C. Single crystals formed from this solution over the course of several days which were suitable for X-ray diffraction studies (17 mg). Due to the complicated  $^1\text{H}$  NMR spectrum, peaks were not assigned and relative integrations were reported only for well isolated peaks. UV-vis, nm, 25 °C in Et<sub>2</sub>O: 542, 596, ~1090.  $^1\text{H}$  NMR ( $\text{CDCl}_3$ , 400 MHz):  $\delta$  48.11 (s, 2H), 38.69 (s, 1H), 36.91 (s, 6H), 12.53 (d, 2H), 8.65 (s, 6H), 7.90 (s, BAr<sup>F</sup><sub>4</sub>), 7.61 (s, BAr<sup>F</sup><sub>4</sub>), 6.58 (d, 9H), 6.17 (s, 1H), 5.07, 4.77, 4.58, 2.38 (s, 3H), 2.09 (s), 1.89 (s), 0.22 (s), -0.43 (s br), -0.46 (s), -2.89 (s, 6H), -9.52 (br), -11.67 (br).

## 2.0 Spectroscopic Data

### 2.1 IR Spectra

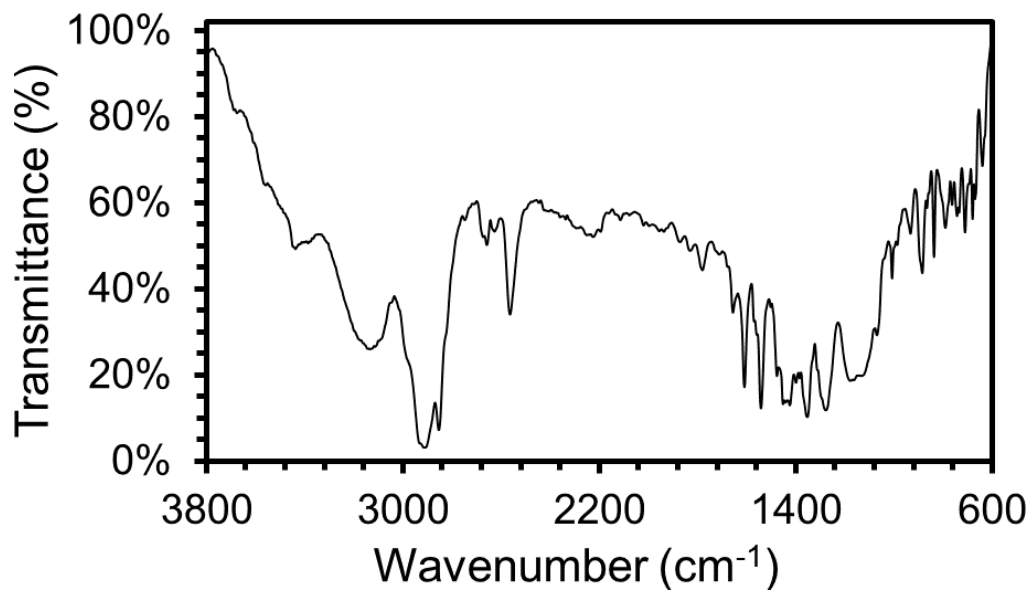

**Figure S1.** Vibrational spectrum of **1** as KBr pellet (see text above for specific peak values).

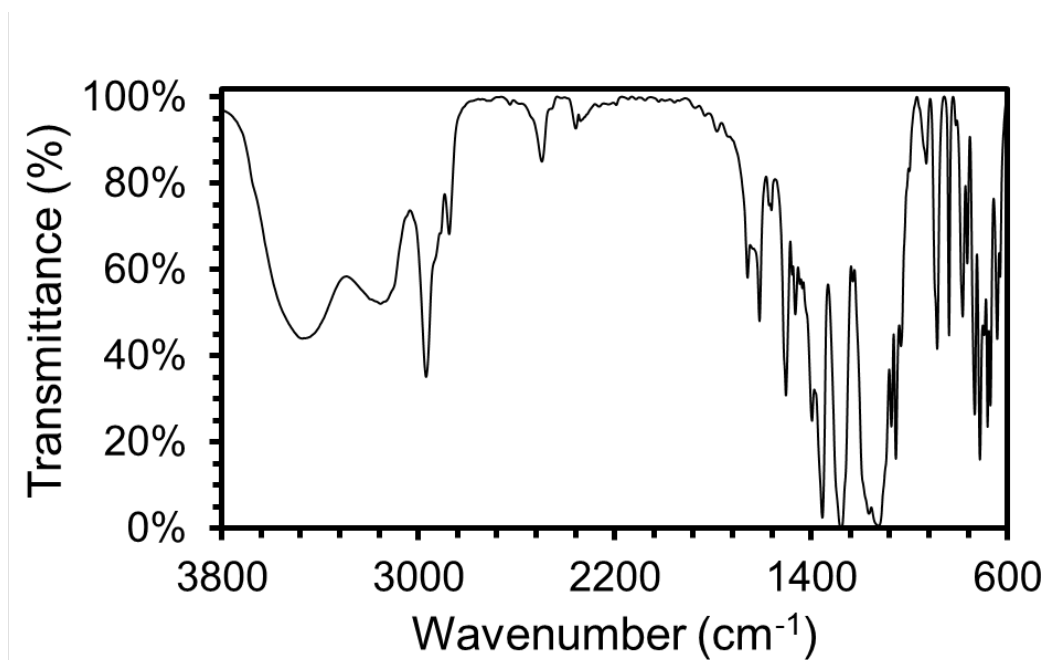

**Figure S2.** Vibrational spectrum of **2** as KBr pellet (see text above for specific peak values).

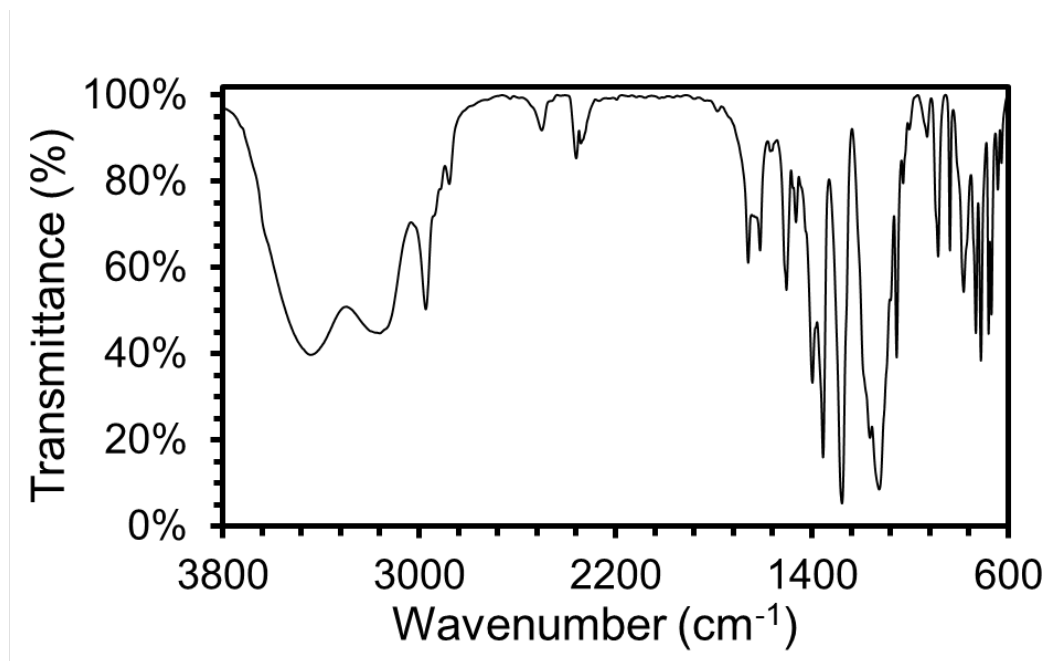

**Figure S3.** Vibrational spectrum of **3** as KBr pellet (see text above for specific peak values).

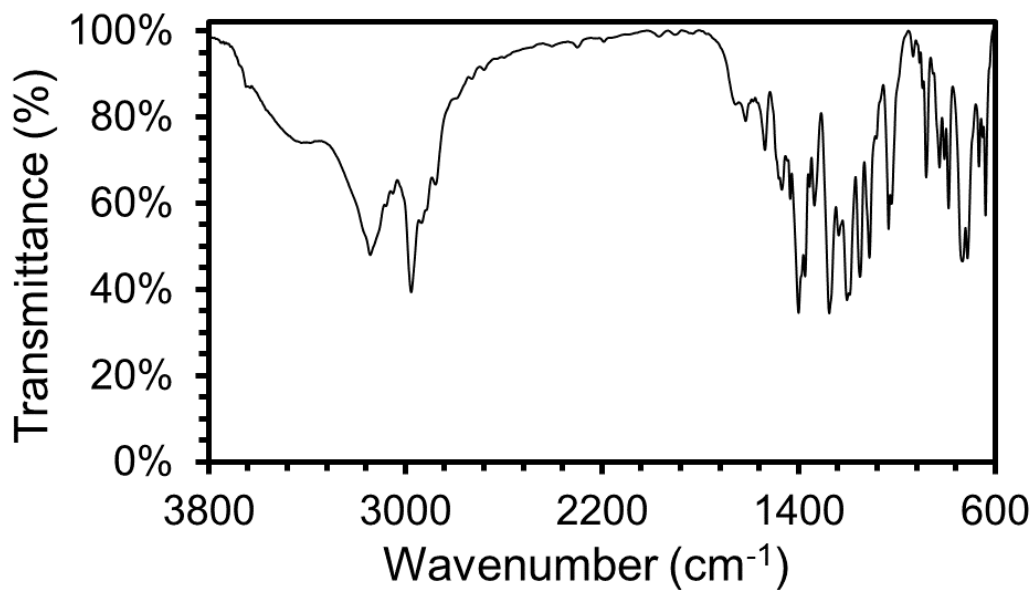

**Figure S4.** Vibrational spectrum of **4** as KBr pellet (see text above for specific peak values).



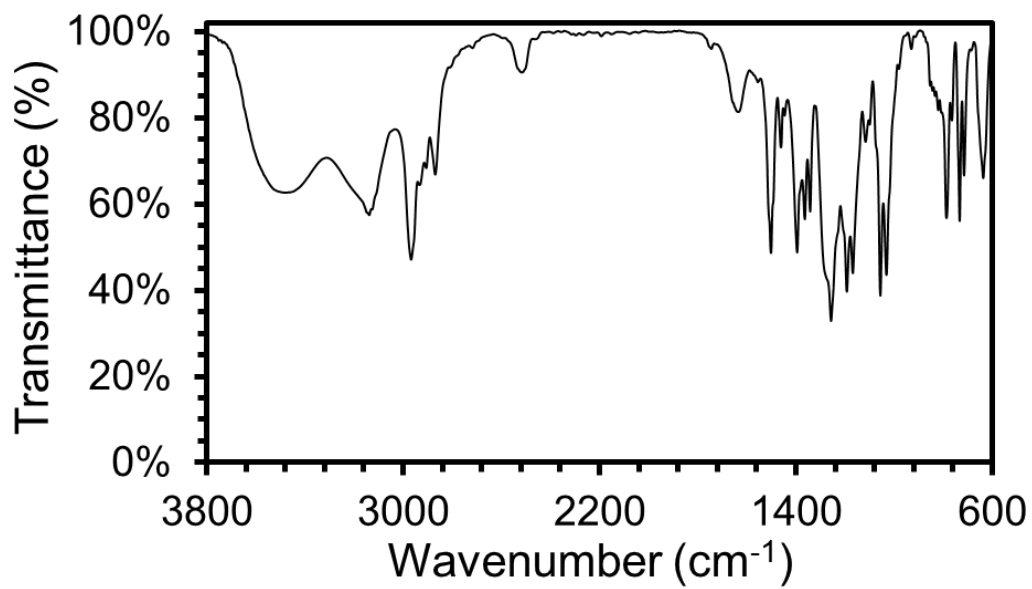

**Figure S5.** Vibrational spectrum of **5** as KBr pellet (see text above for specific peak values).

## 2.2 UV-vis Spectra

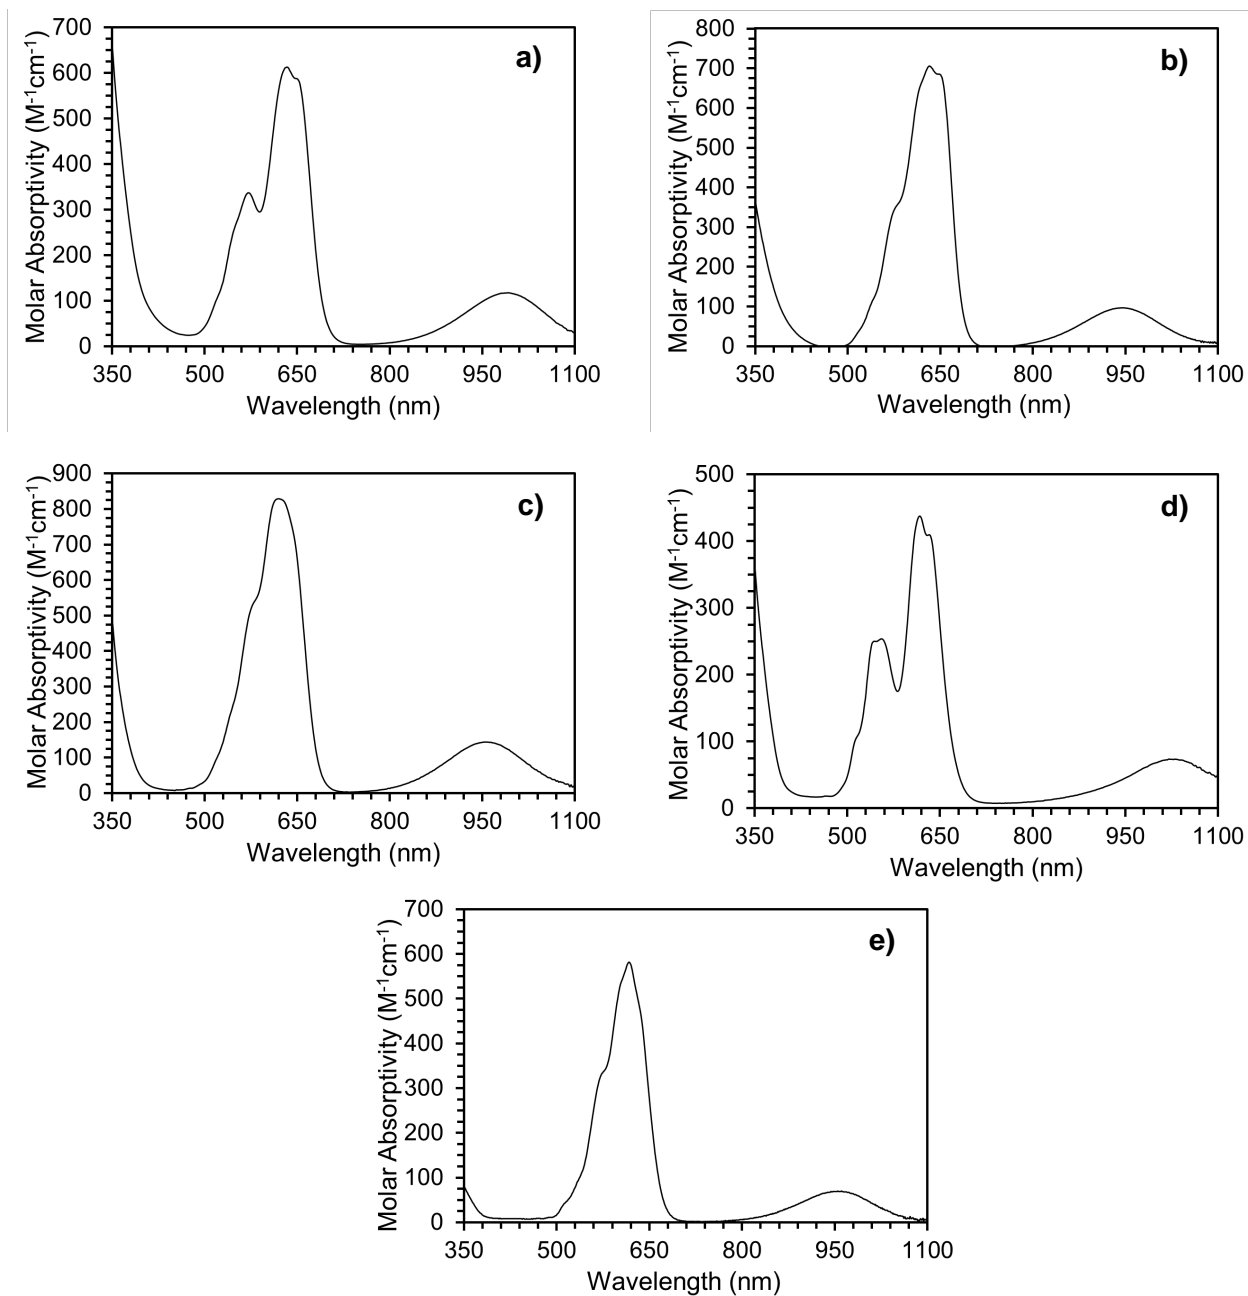

**Figure S6.** UV-vis spectra for complexes **1** (a), **2** (b), **3** (c), **4** (d), and **5** (e). Complexes **1-3** and **5** are solutions in  $Et_2O$  while **4** is a solution in DCM, all recorded at room temperature. See text above for detailed peak positions and absorptivity values.

## 2.3 NMR Spectra

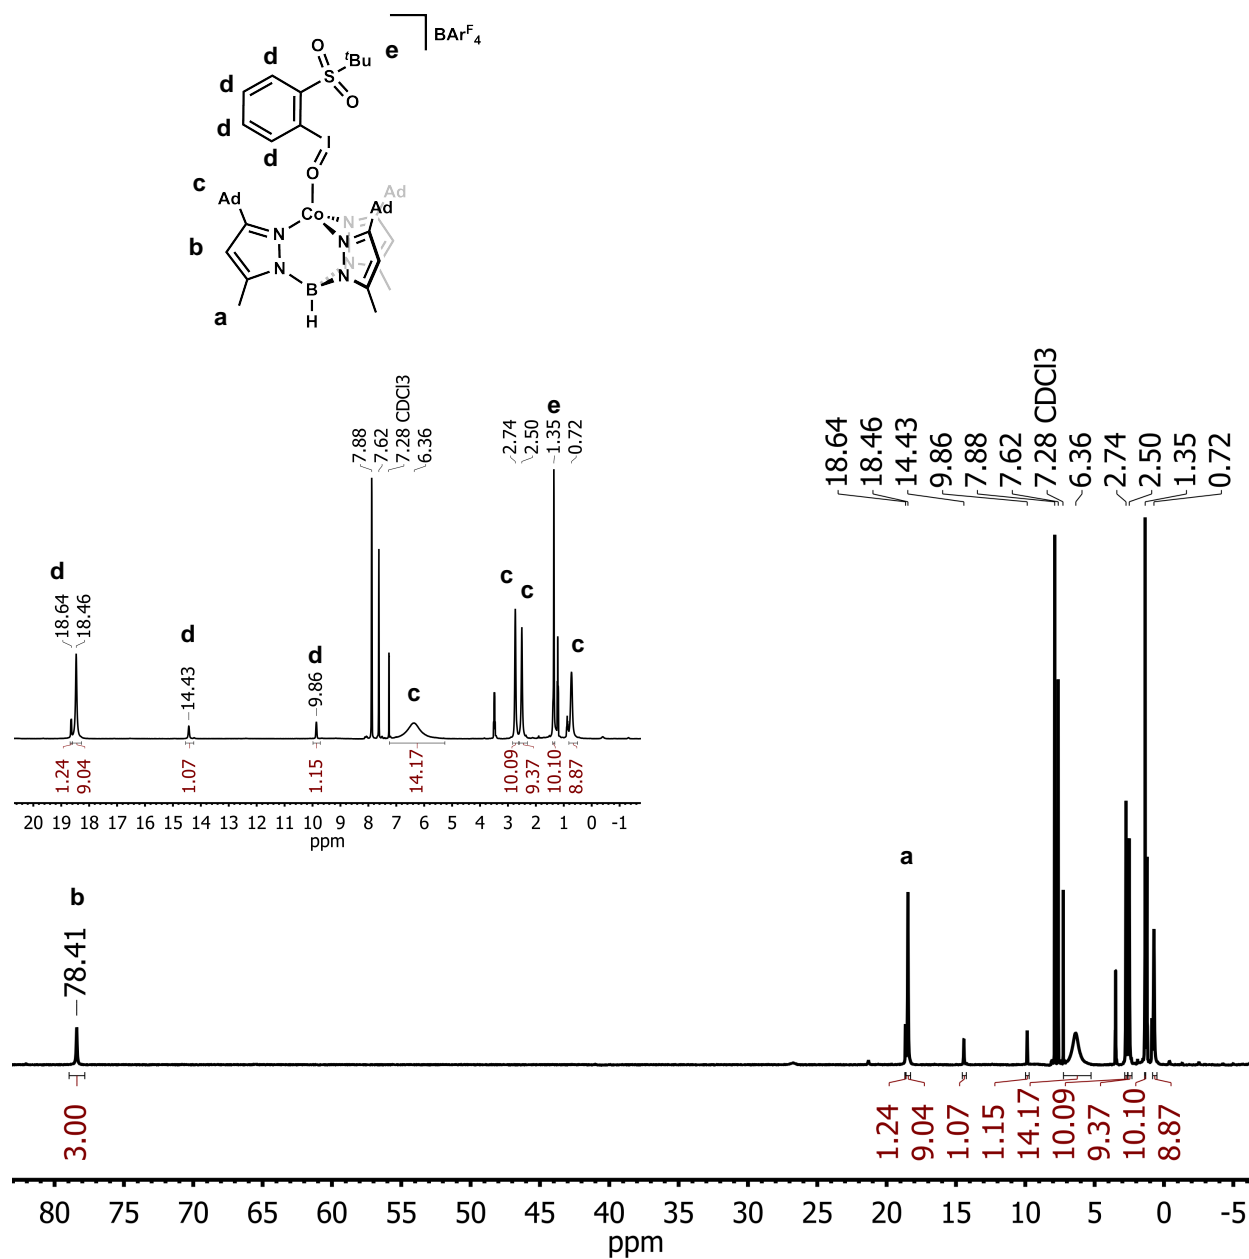

**Figure S7.** The  $^1\text{H}$  NMR spectrum of **1** in  $\text{CDCl}_3$ . Inset is expanded near the diamagnetic region to show details. Note: Residual solvent and  $\text{BAR}^{\text{F}_4}$  resonances not labeled.

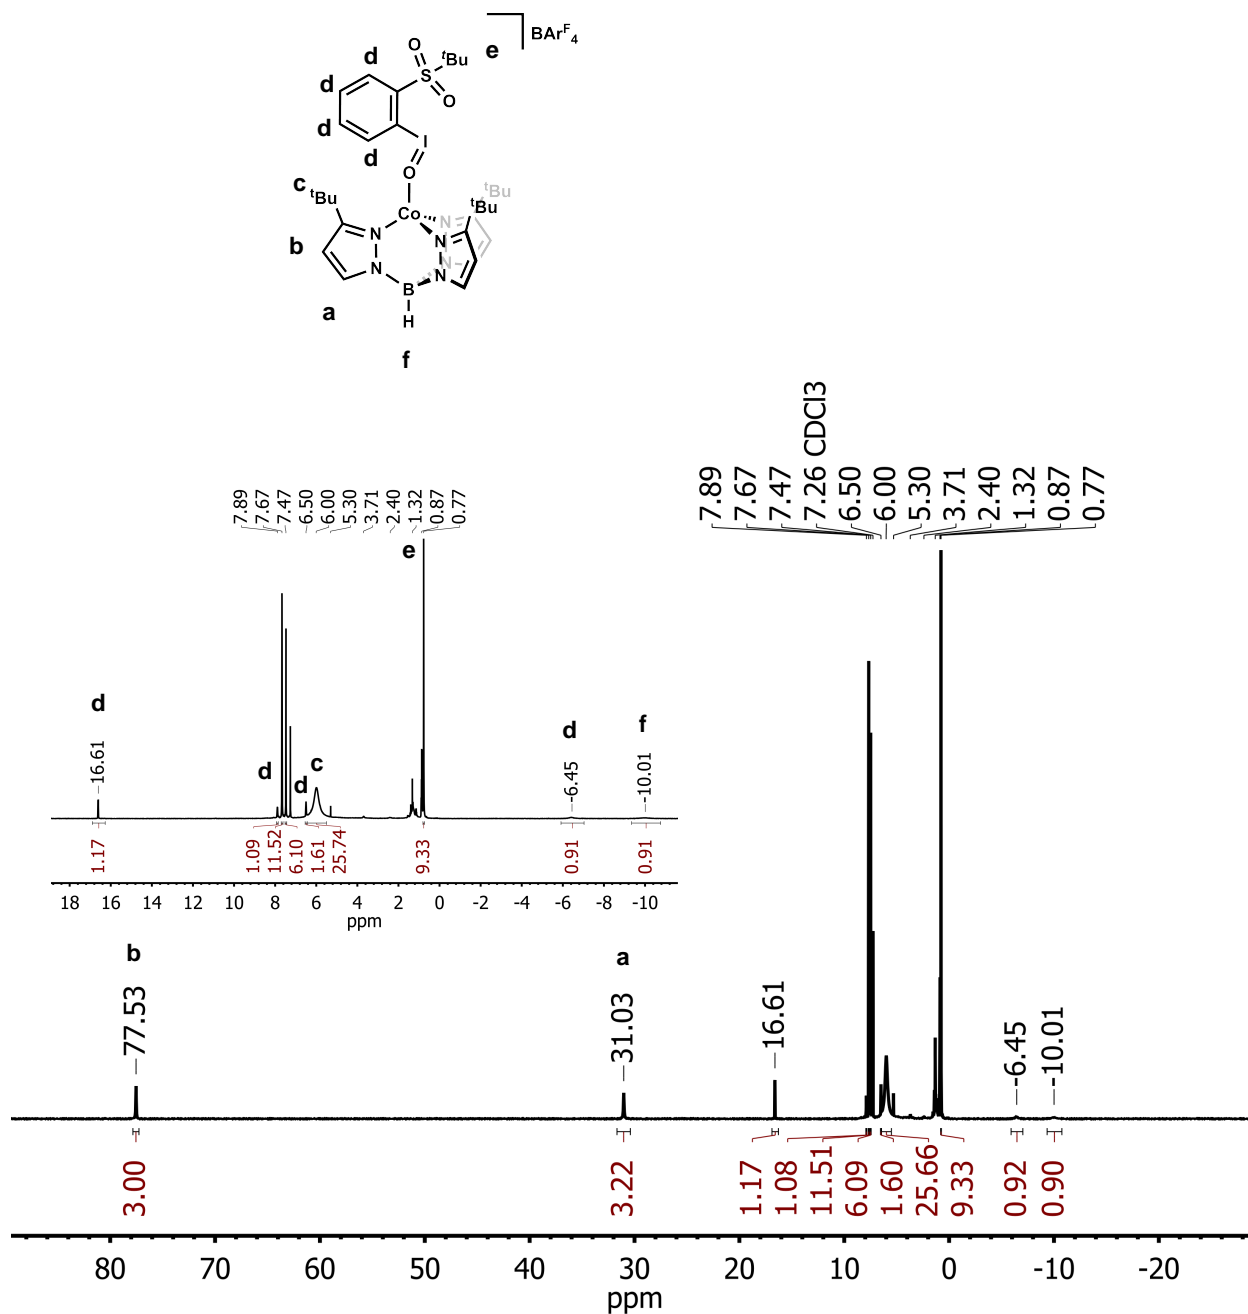

**Figure S8.** The  $^1\text{H}$  NMR spectrum of **2** in  $\text{CDCl}_3$ . Inset is expanded near the diamagnetic region to show details. Note: Residual solvent and  $\text{BAr}^{\text{F}_4}$  resonances not labeled.

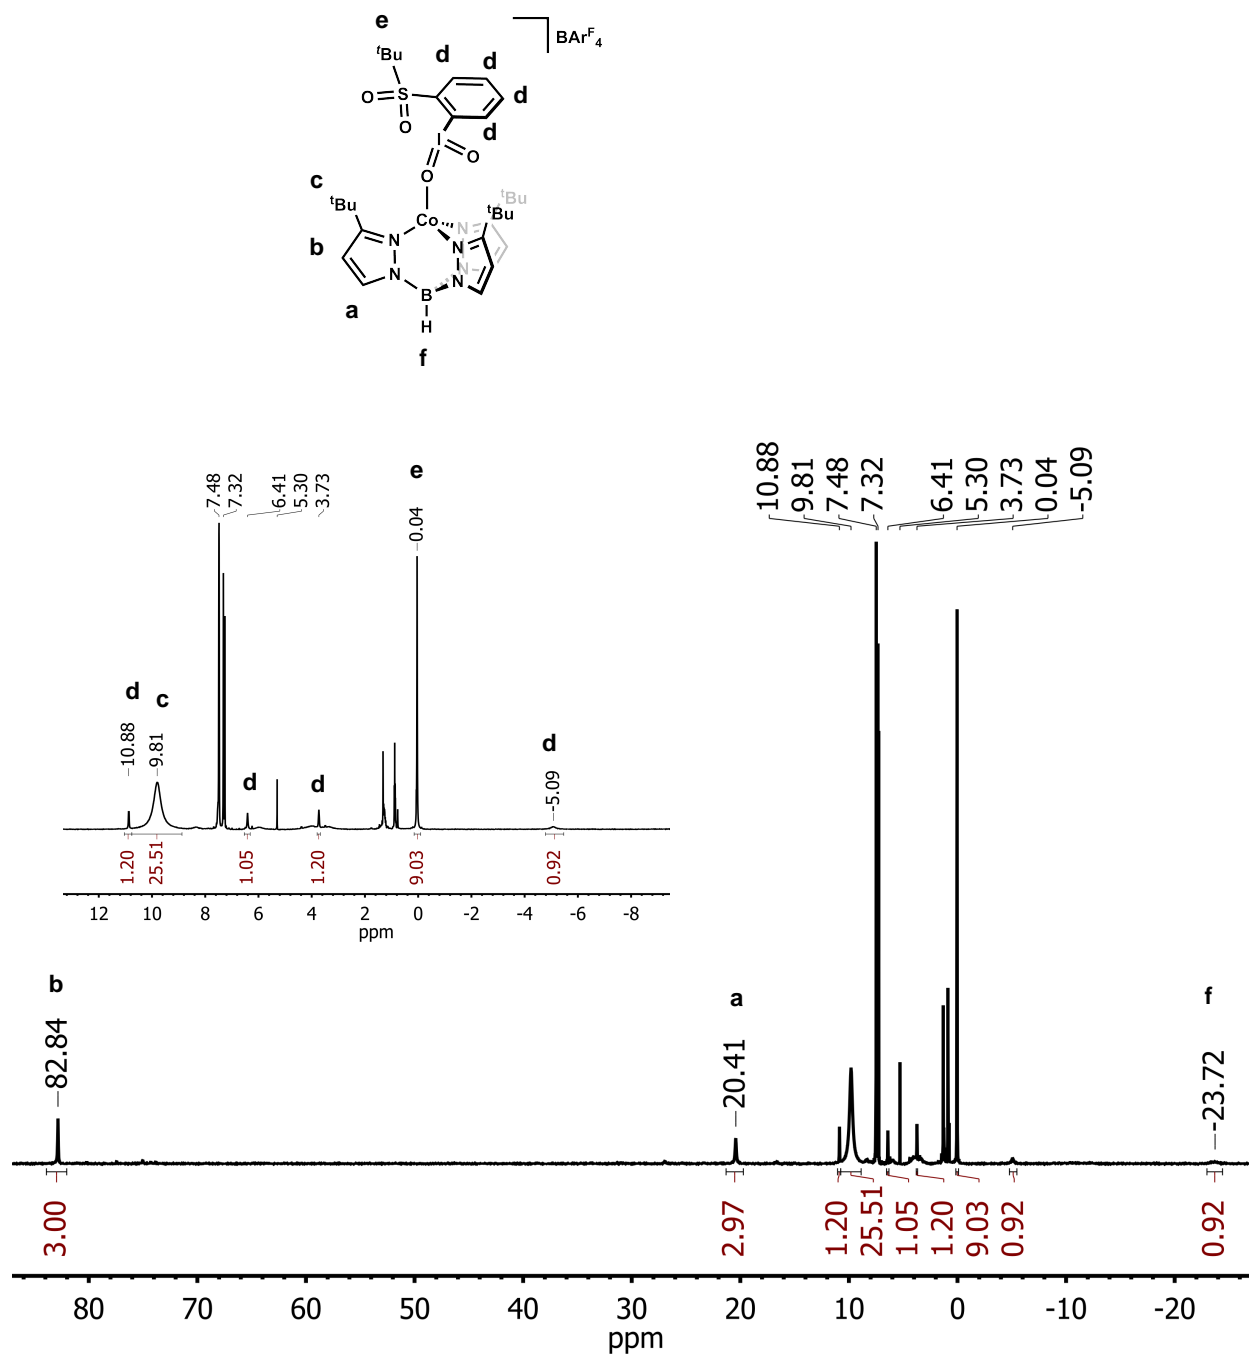

**Figure S9.** The  $^1\text{H}$  NMR spectrum of **3** in  $\text{CDCl}_3$ . Inset is expanded near the diamagnetic region to show details. Note: Residual solvent and  $\text{BAr}^{\text{F}}_4$  resonances not labeled.

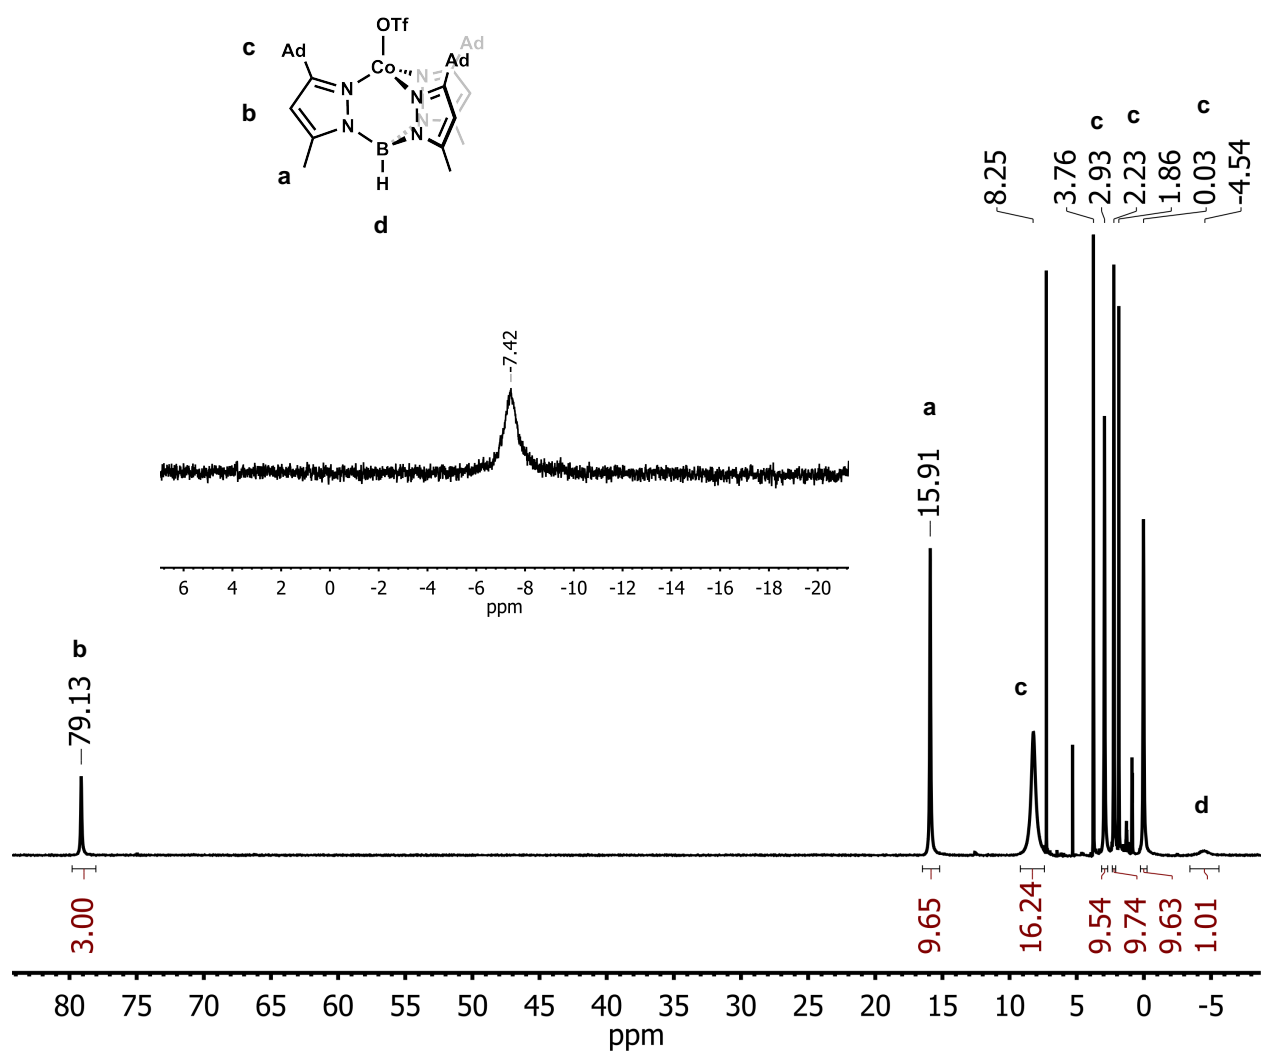

**Figure S10.** The  $^1\text{H}$  NMR spectrum of **4** in  $\text{CDCl}_3$ . Inset:  $^{19}\text{F}$  NMR spectrum of the same solution. Note: Residual solvent resonances not labeled.

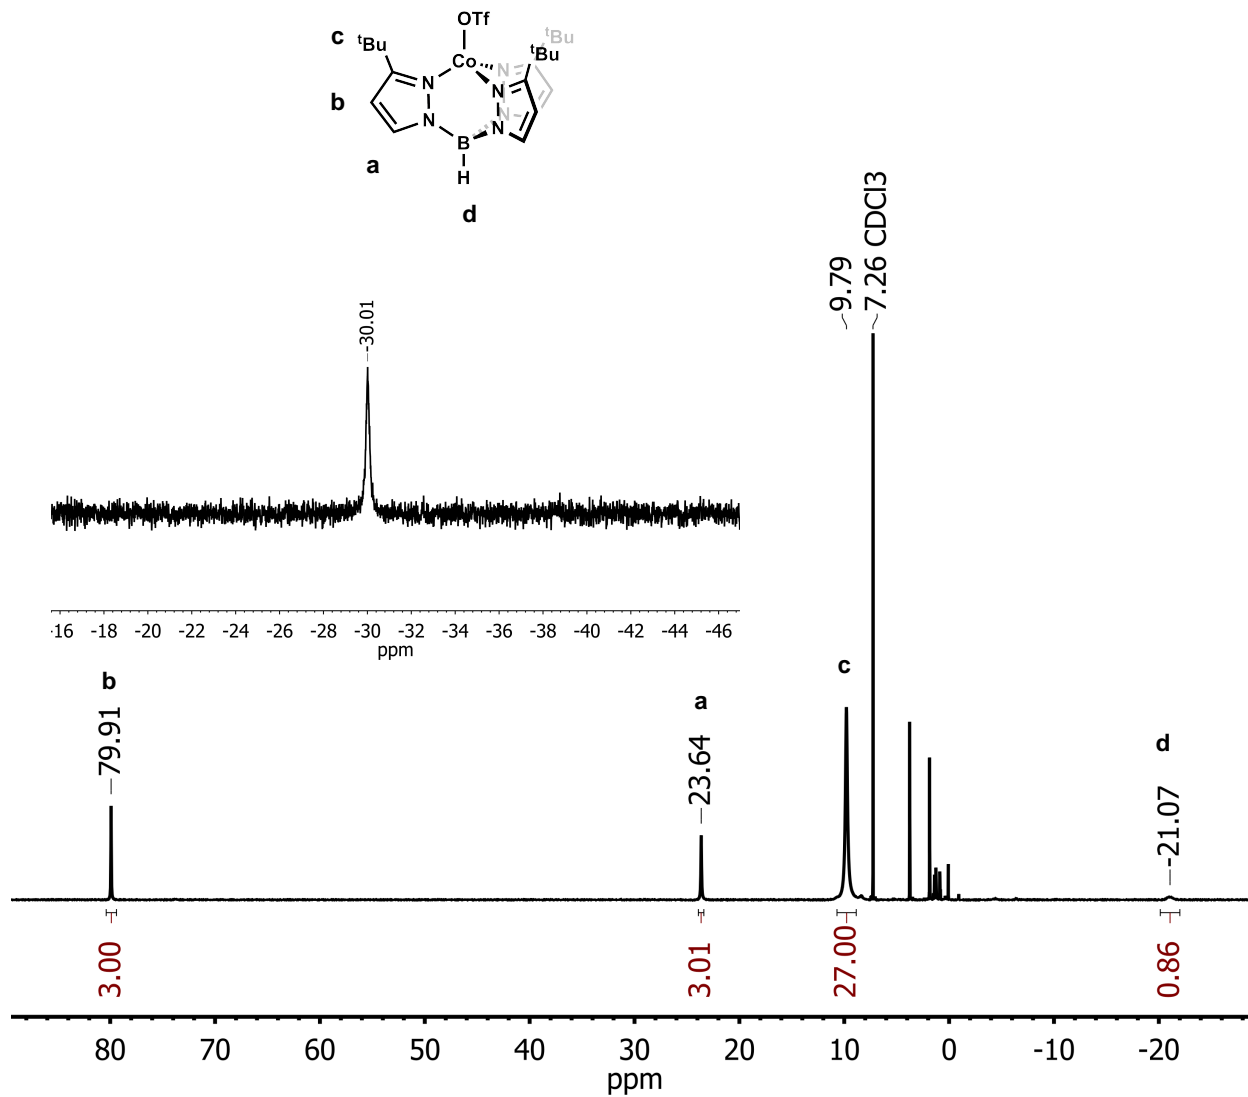

**Figure S11.** The  $^1\text{H}$  NMR spectrum of **5** in  $\text{CDCl}_3$ . Inset:  $^{19}\text{F}$  NMR spectrum of the same solution. Note: Residual solvent resonances not labeled.

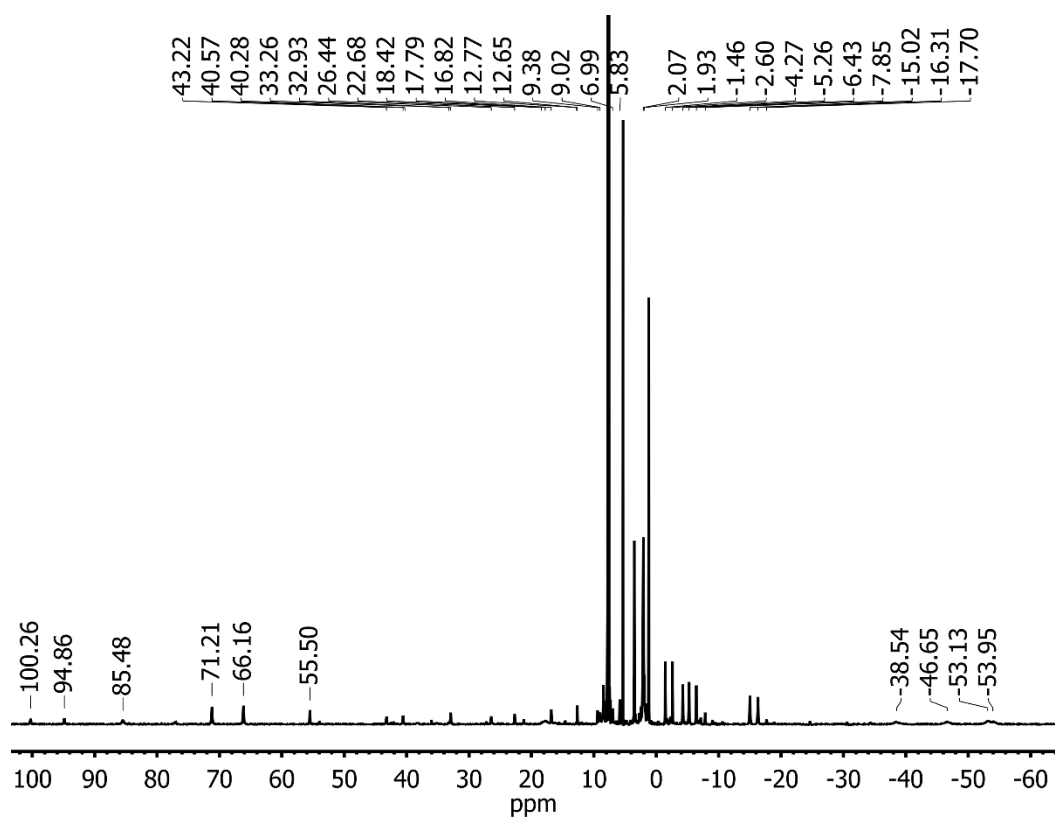

**Figure S12.** The  $^1\text{H}$  NMR spectrum of the decay of **1** (2.5 mM in  $\text{CD}_2\text{Cl}_2$ ) after 24 h. Note: the top of residual solvent and  $\text{BAR}^{\text{F}_4}$  anion peaks have been clipped to better show paramagnetic peaks.



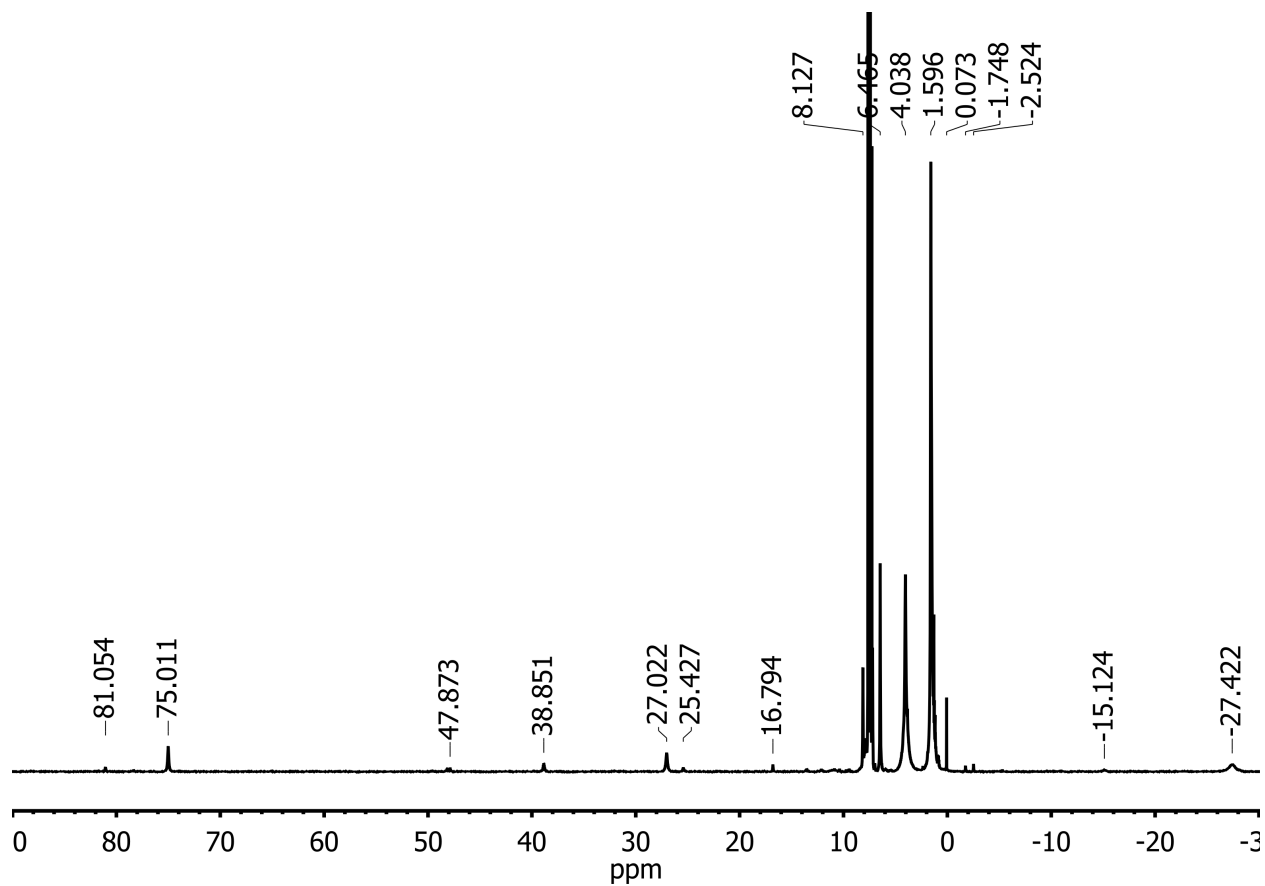

**Figure S13.** The  $^1\text{H}$  NMR spectrum of the decay of **2** (in  $\text{CDCl}_3$ ) after standing for 14 d in  $\text{Et}_2\text{O}$ . Note: the top of residual solvent and  $\text{BAr}^{\text{F}_4}$  anion peaks have been clipped to better show paramagnetic peaks.

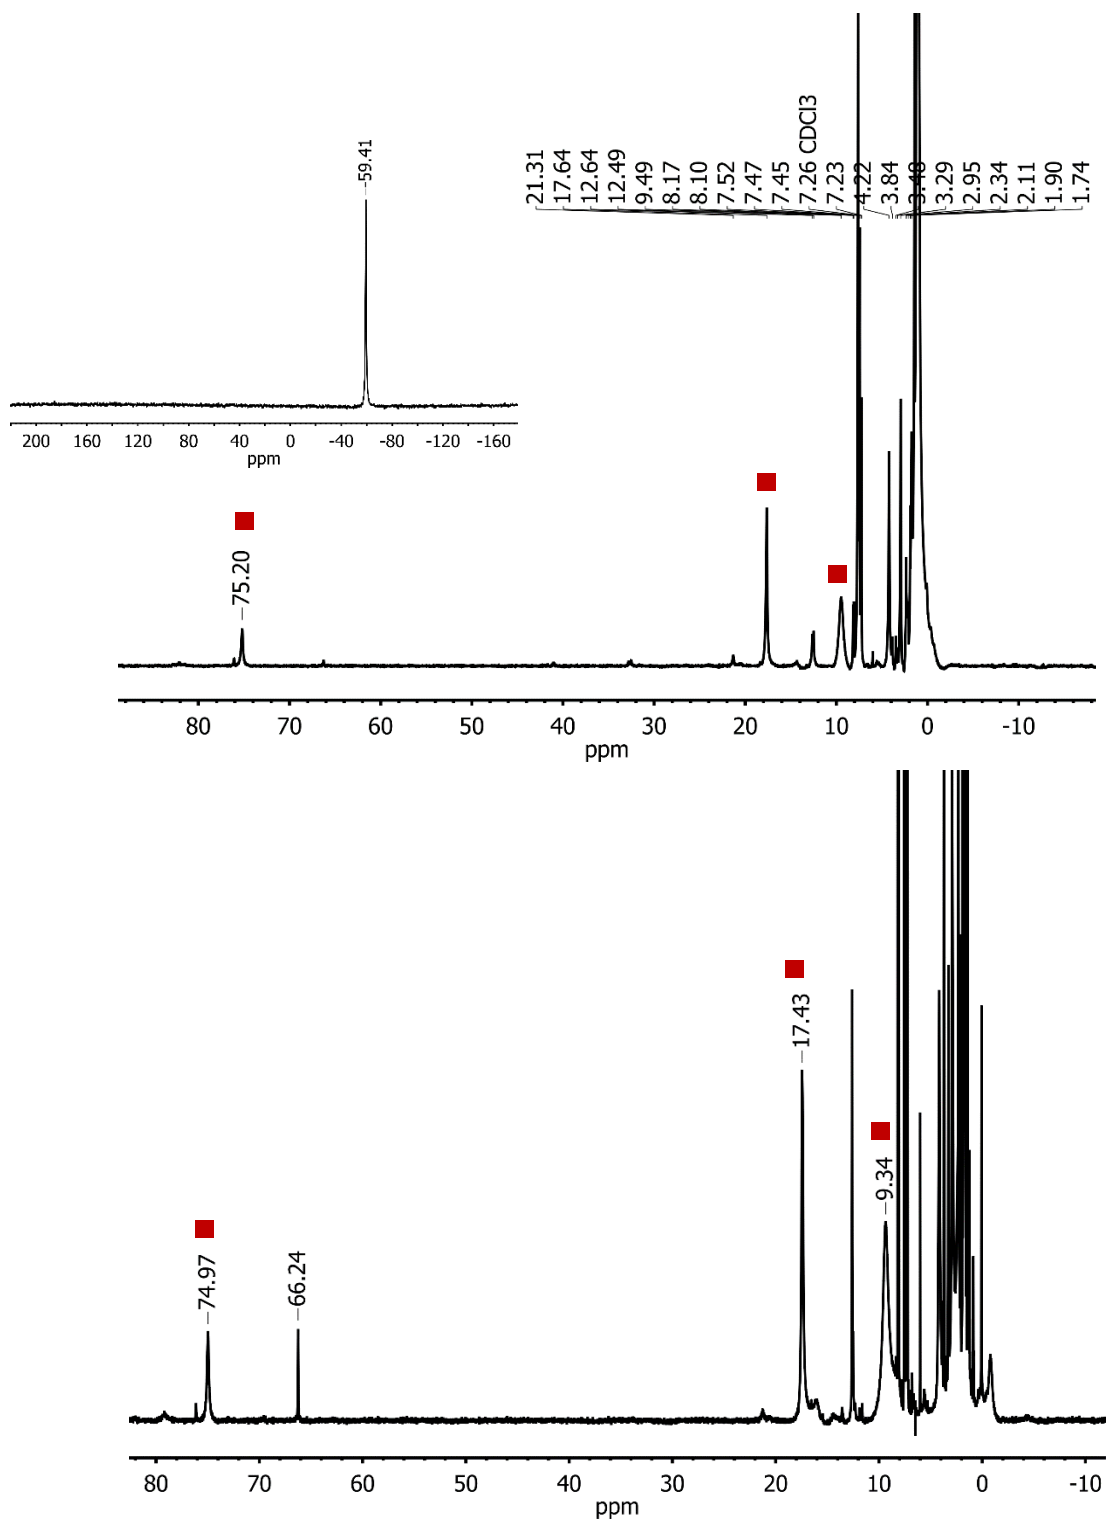

**Figure S14.** The  $^1\text{H}$  NMR spectrum of the reaction of **1** (2.5 mM in  $\text{CDCl}_3$ ) with (top) 10 equiv of  $\text{PMe}_3$  and (bottom) independently prepared  $\text{OPMe}_3$  ( $\text{OPMe}_3$  prepared by treating  $^8\text{PhIO}$  with 1.1 equiv of  $\text{PMe}_3$  in  $\text{CDCl}_3$  and stirring for 1 h). Red squares indicate the putative  $\text{OPMe}_3$  adduct. Note: the top of the residual solvent peaks and excess  $\text{PMe}_3$  have been clipped to better show paramagnetic features. Inset:  $^{31}\text{P}$  NMR spectrum of reaction mixture, consistent with free  $\text{PMe}_3$ .

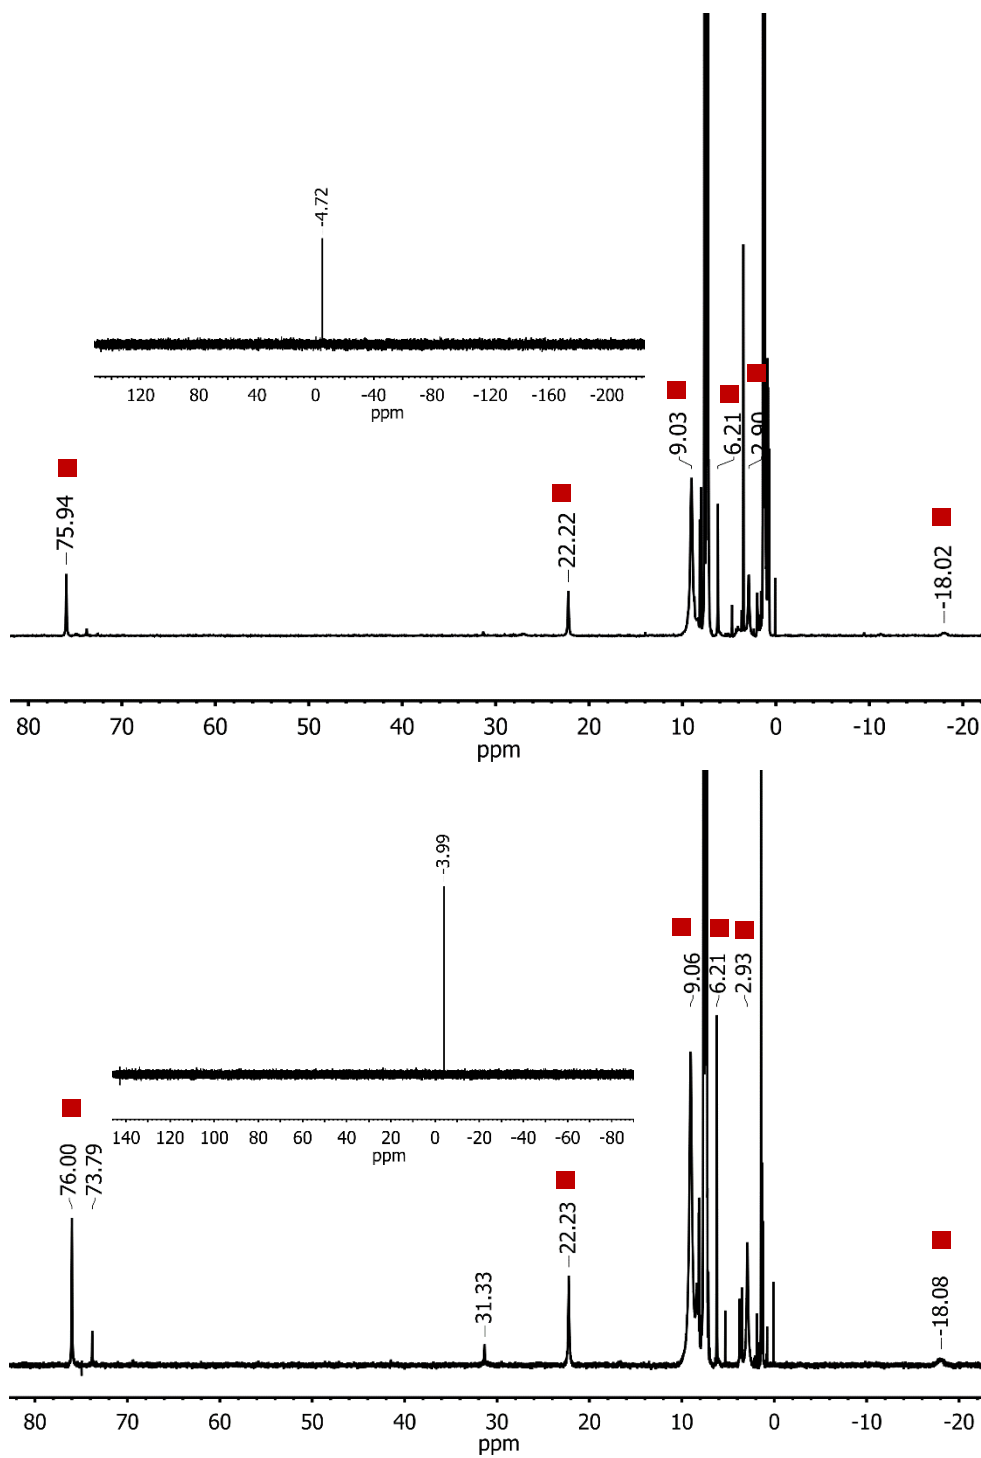

**Figure S15.** The <sup>1</sup>H NMR spectrum (CDCl<sub>3</sub>) of the 2.5 mM reaction of **2** (top) and **3** (bottom) with 10 equiv of PPh<sub>3</sub>. Red squares are assigned to resonances for the OPh<sub>3</sub> adduct, other paramagnetic peaks arise from an unknown impurity. Note: the top of the residual solvent, BA<sup>r</sup>F<sub>4</sub>, and excess PPh<sub>3</sub> resonances have been clipped to better show paramagnetic peaks. Inset: <sup>31</sup>P NMR spectrum of the respective reaction mixtures consistent with free PPh<sub>3</sub>.

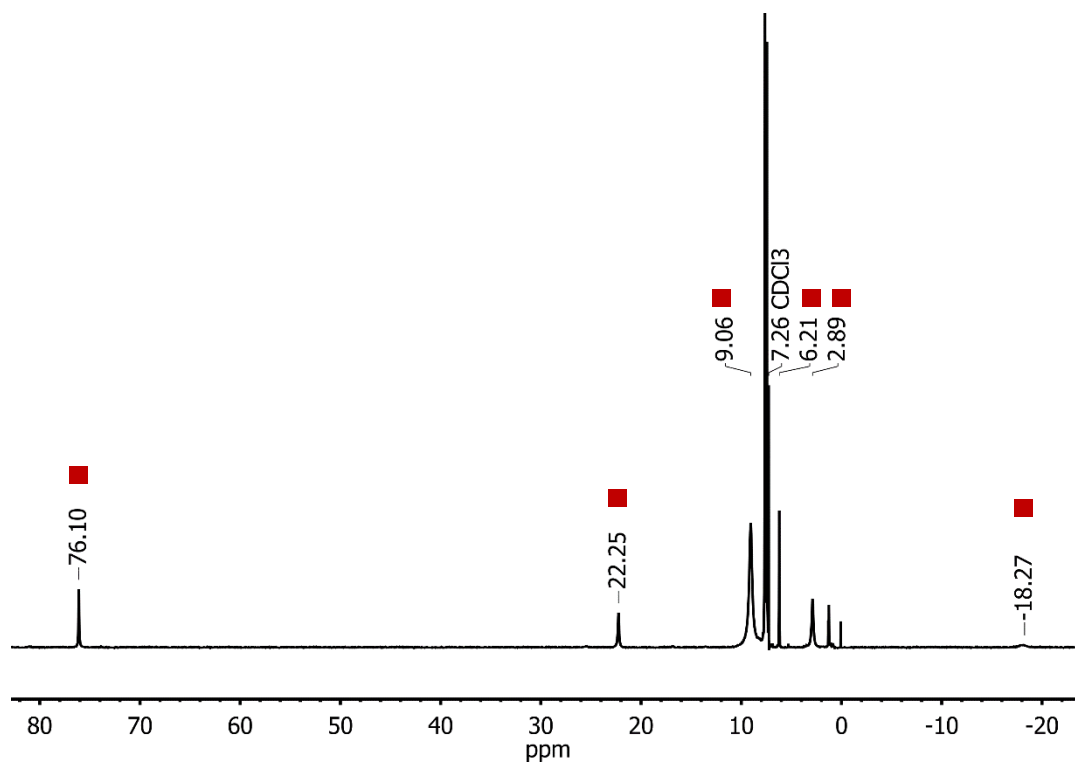

**Figure S16:** The  $^1\text{H}$  NMR spectrum of independently synthesized  $\text{OPPh}_3$  adduct prepared by treatment of a solution of **5** with 1.1 equiv of  $\text{OPPh}_3$  in the presence of 1.1 equiv  $\text{NaBAR}^{\text{F}_4}$ . Note: Peaks for residual solvent and  $\text{BAR}^{\text{F}_4}$  anion have been clipped off to show detail of paramagnetic features.

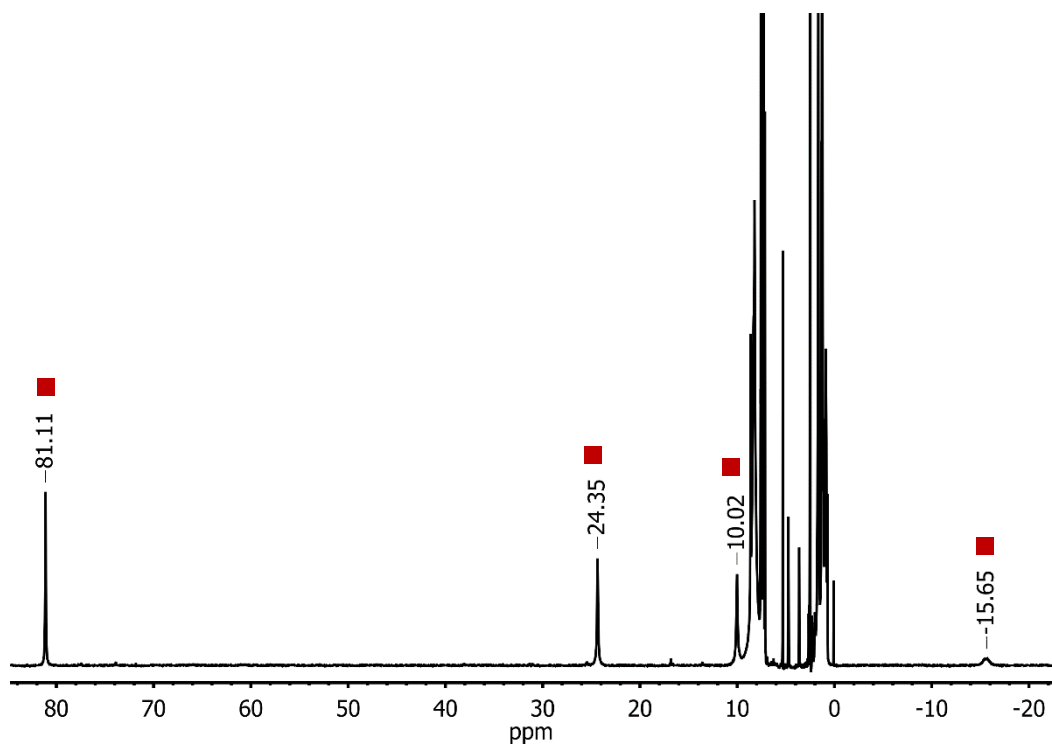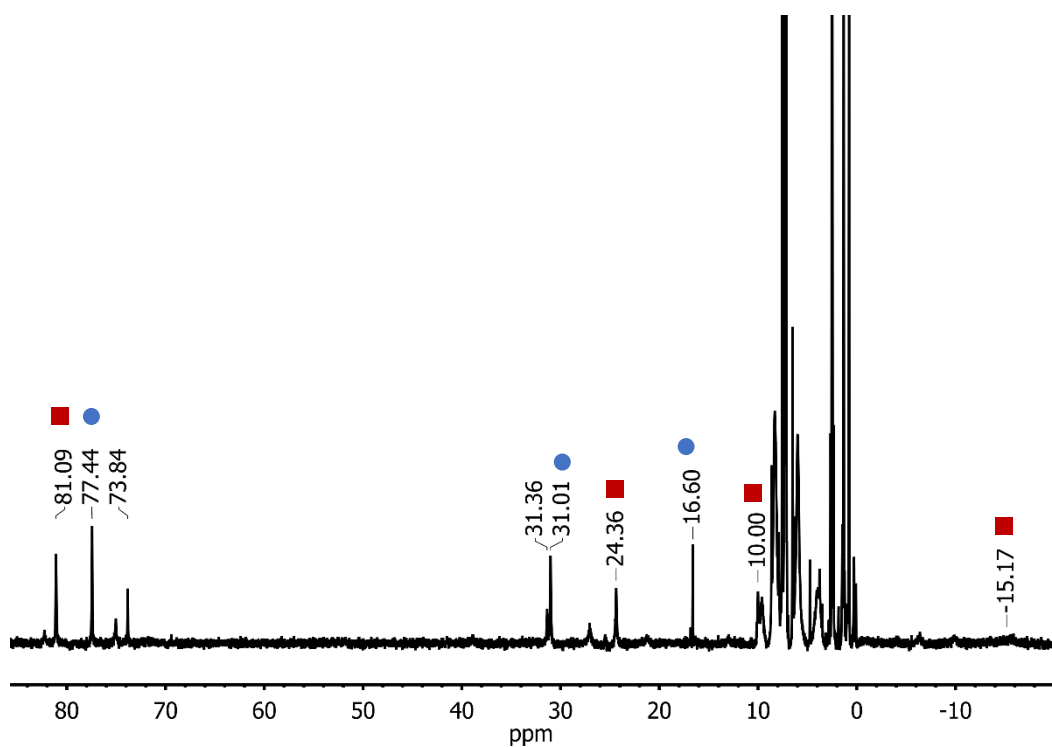

**Figure S17.** The  $^1\text{H}$  NMR spectrum of the reaction of **2** (top,  $\text{CDCl}_3$ ) and **3** (bottom, 2.5 mM in  $\text{CDCl}_3$ ) with 10 equiv thioanisole after 52 and 32 h. Red squares mark resonances for the PhSOMe adduct (see below), blue circles are for **2** formed as the immediate decay product of **3**, and other paramagnetically shifted peaks are from an unknown impurity. Note: The top of the residual solvent peaks and  $\text{BAR}^{\text{F}_4}$  resonances have been clipped off to better show paramagnetic features.

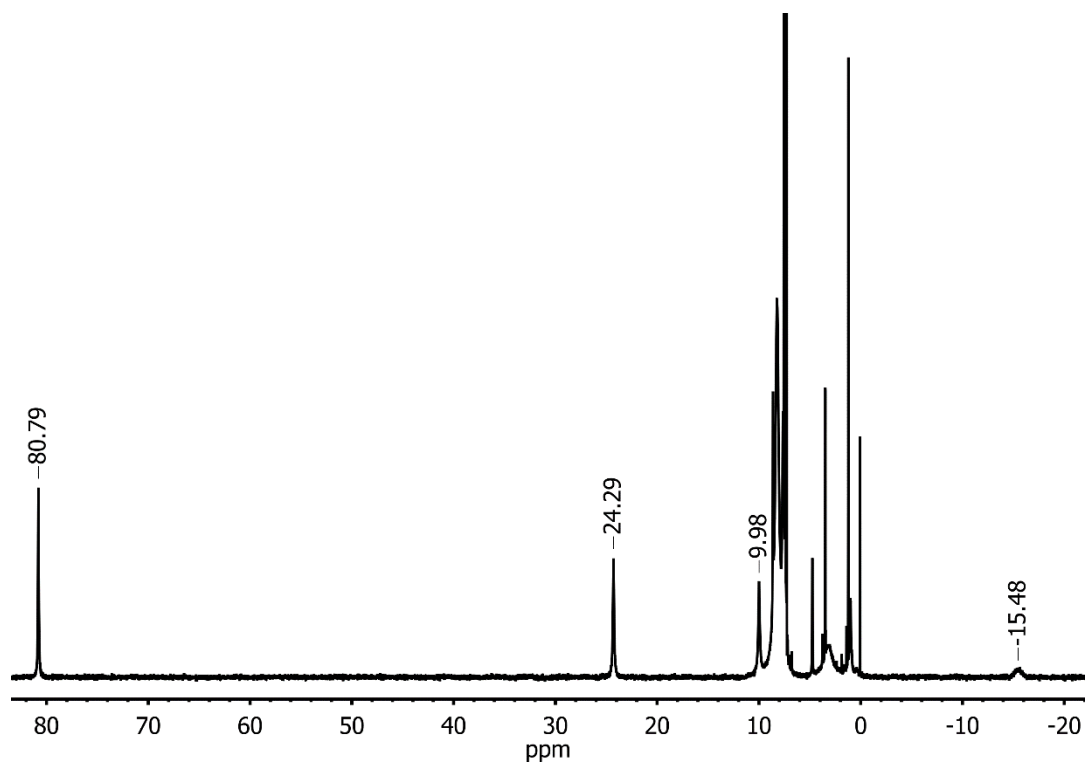

**Figure S18.** The  $^1\text{H}$  NMR spectrum of independently prepared  $\text{CoTp}^{\text{tBu}}\text{-PhSOMe}$  adduct ( $\text{CDCl}_3$ ) generated by the addition of 1.1 equiv of PhSOMe to **2** in the presence of 1.1 equiv  $\text{NaBAR}^{\text{F}_4}$ . Note: residual solvent peaks have been clipped at the top to better show paramagnetic peaks.

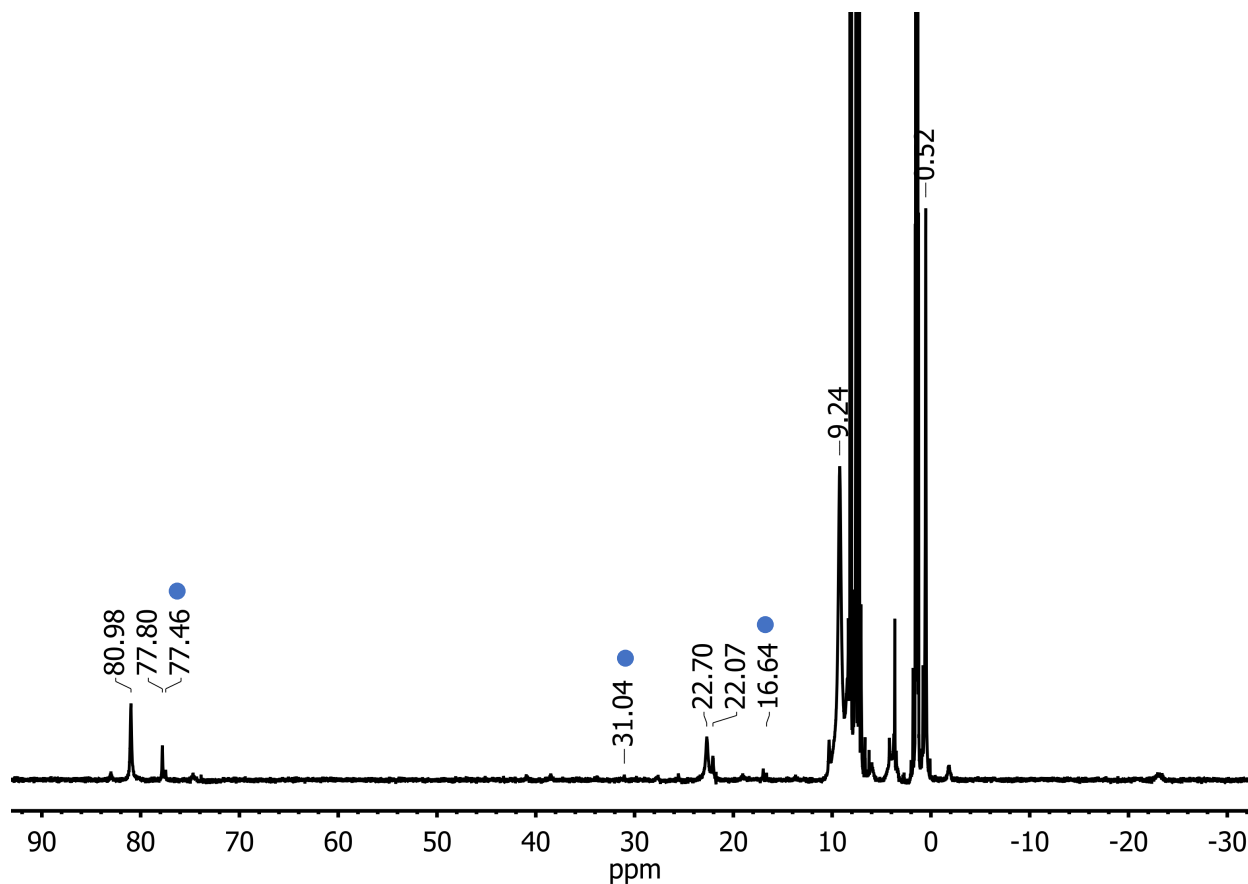

**Figure S19.** The  $^1\text{H}$  NMR spectrum of the reaction of **3** with 20 equivalents of  $^s\text{PhI}$  in  $\text{CDCl}_3$ . Peaks labeled with blue circles correspond to some of complex **2** produced while other labeled resonances belong to unknown paramagnetic products. Note: residual solvent,  $^s\text{PhI}$ , and  $\text{BAr}^{\text{F}_4}$  resonances have been clipped at the top to better show paramagnetic peaks.

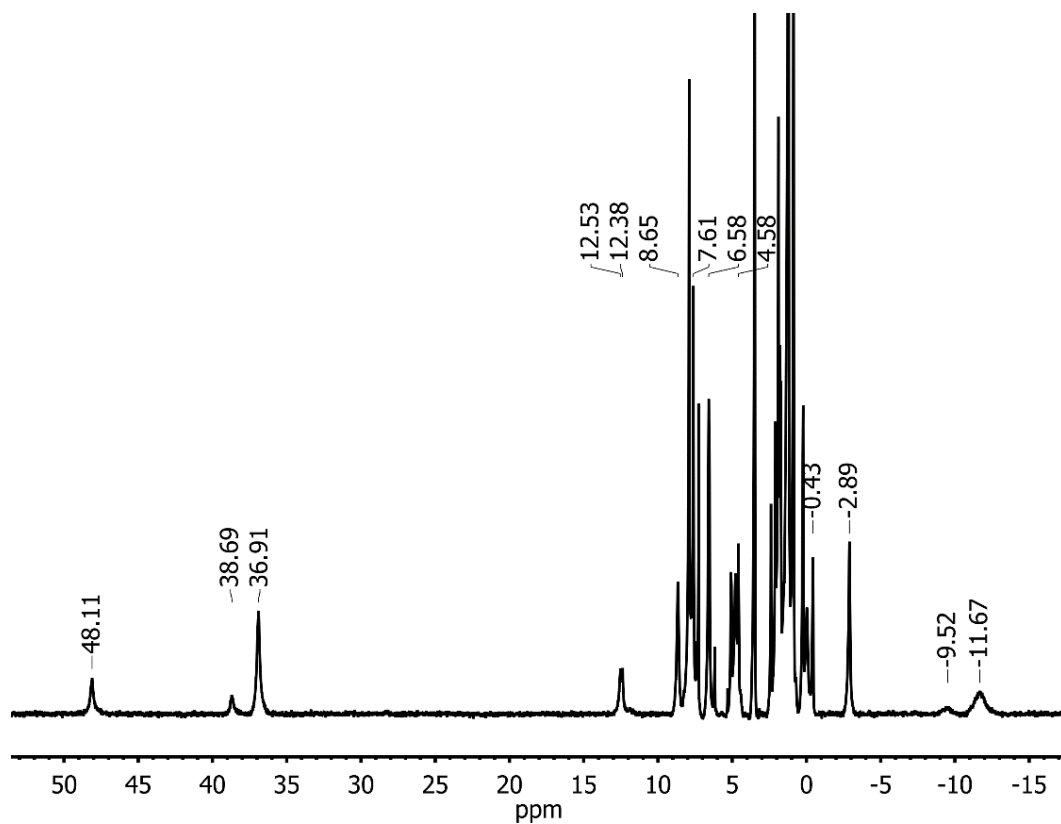

**Figure S20.** The  $^1\text{H}$  NMR spectrum of the crystals of **6** obtained from the reaction of **1** with 10 equiv of  $\text{ScOTf}_3$ . Note: the top of residual solvent peaks has been clipped off to better show the paramagnetic features.



## 2.4 EPR Spectra

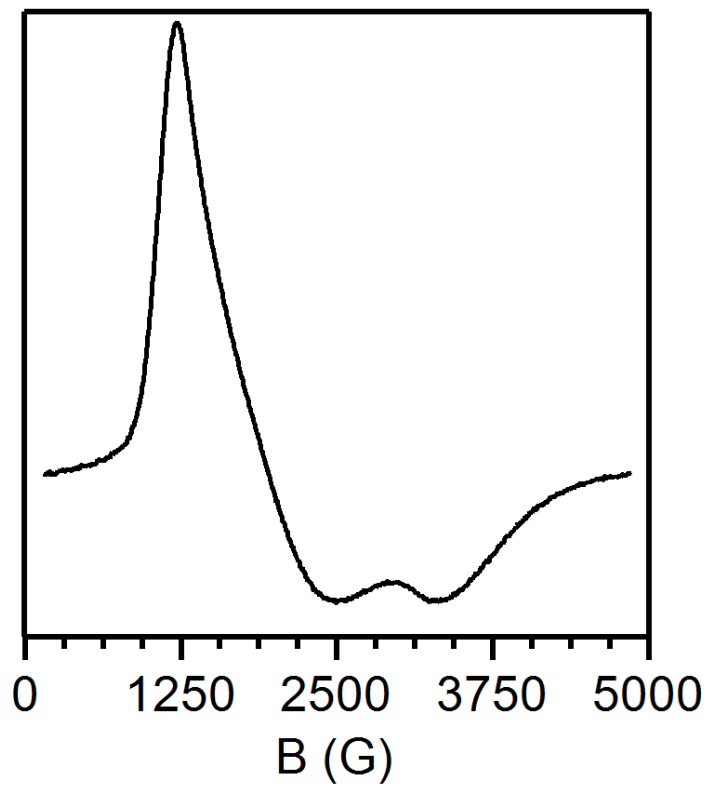

**Figure S21.** The X-band EPR spectrum of **1** collected on a 15 mM solution in Et<sub>2</sub>O at 15 K. Microwave frequency: 9.63 GHz, microwave power: 0.2 mW, and  $g_{\text{eff}} = 5.55, 3.58, \text{ and } 2.05$ .

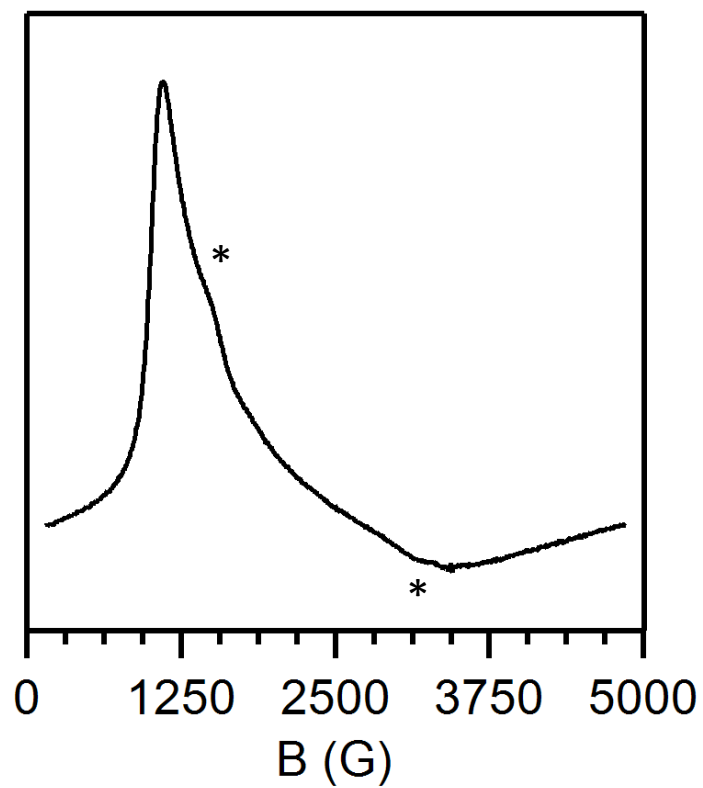

**Figure S22.** The X-band EPR spectrum of **2** collected on a 15 mM solution in Et<sub>2</sub>O at 15 K. Microwave frequency: 9.63 GHz, microwave power: 2.0 mW, and  $g_{\text{eff}} = 6.25, 3.49,$  and 2.05. Asterisks indicate what is consistent with a small amount of **5**.

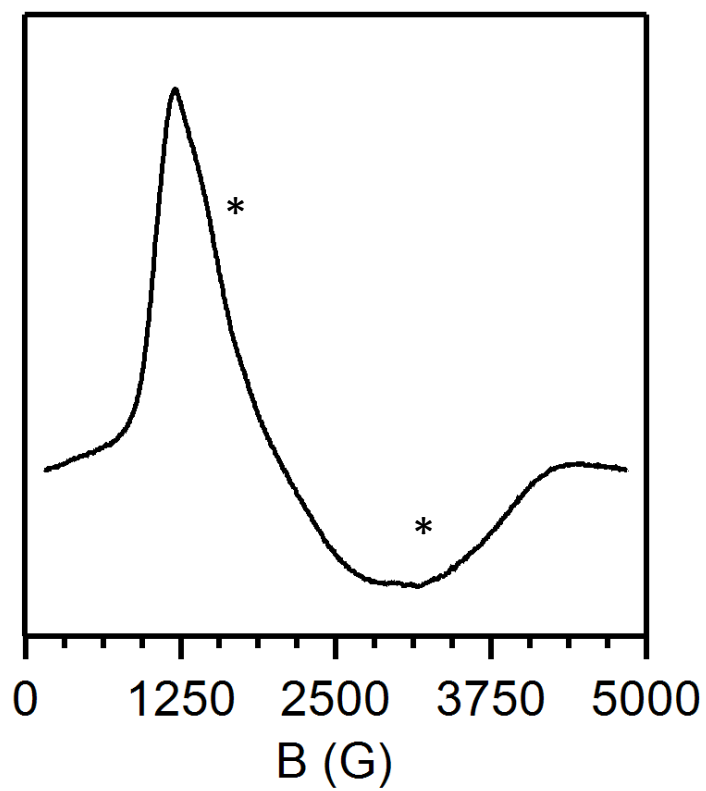

**Figure S23.** The X-band EPR spectrum of **3** collected on a 15 mM solution in Et<sub>2</sub>O at 15 K. Microwave frequency: 9.63 GHz, microwave power: 0.6 mW, and  $g_{\text{eff}} = 5.66, 3.44,$  and 2.29. Asterisks indicate what is consistent with a small amount of **5**.

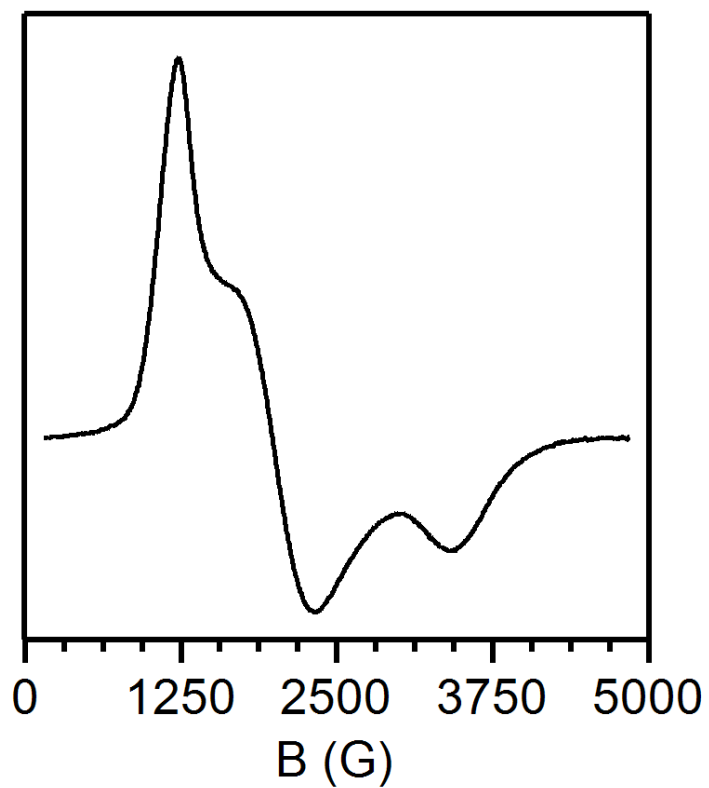

**Figure S24.** The X-band EPR spectrum of **4** collected on a 15 mM solution in THF at 15 K. Microwave frequency: 9.63 GHz, microwave power: 0.2 mW, and  $g_{\text{eff}} = 5.51, 3.40,$  and 2.01.

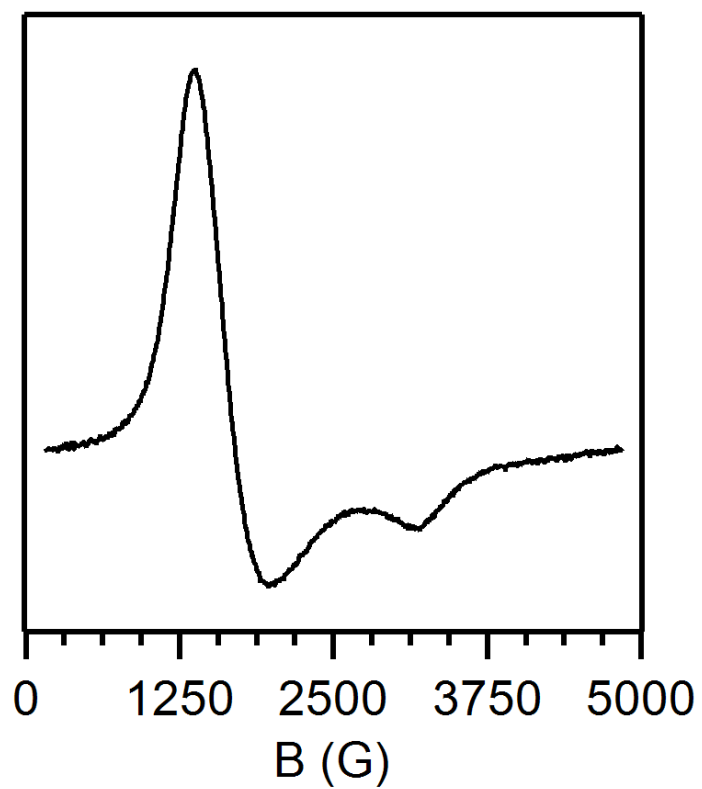

**Figure S25.** The X-band EPR spectrum of **5** collected on a 15 mM solution in Et<sub>2</sub>O at 15 K. Microwave frequency: 9.63 GHz, microwave power: 0.2 mW, and  $g_{\text{eff}} = 5.02, 4.05, \text{ and } 2.17$ .

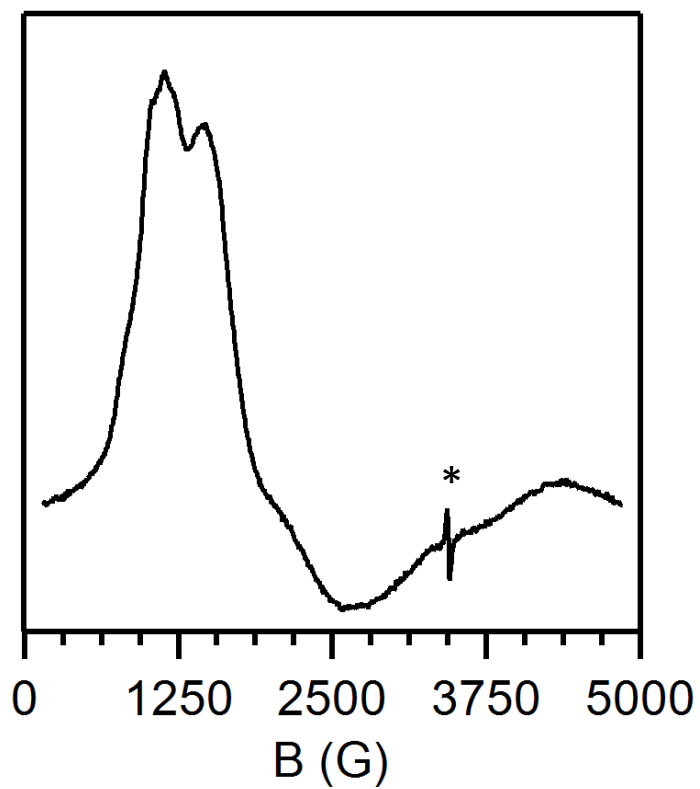

**Figure S26.** The X-band EPR spectrum of **6** collected on a 9 mM solution in  $\text{CDCl}_3$  at 15 K. Microwave frequency: 9.63 GHz, microwave power: 4.0 mW, and  $g_{\text{eff}} = 5.66, 3.28,$  and 2.15. Asterisk indicates an unknown  $S = \frac{1}{2}$  impurity.

## 2.5 Mass Spectra

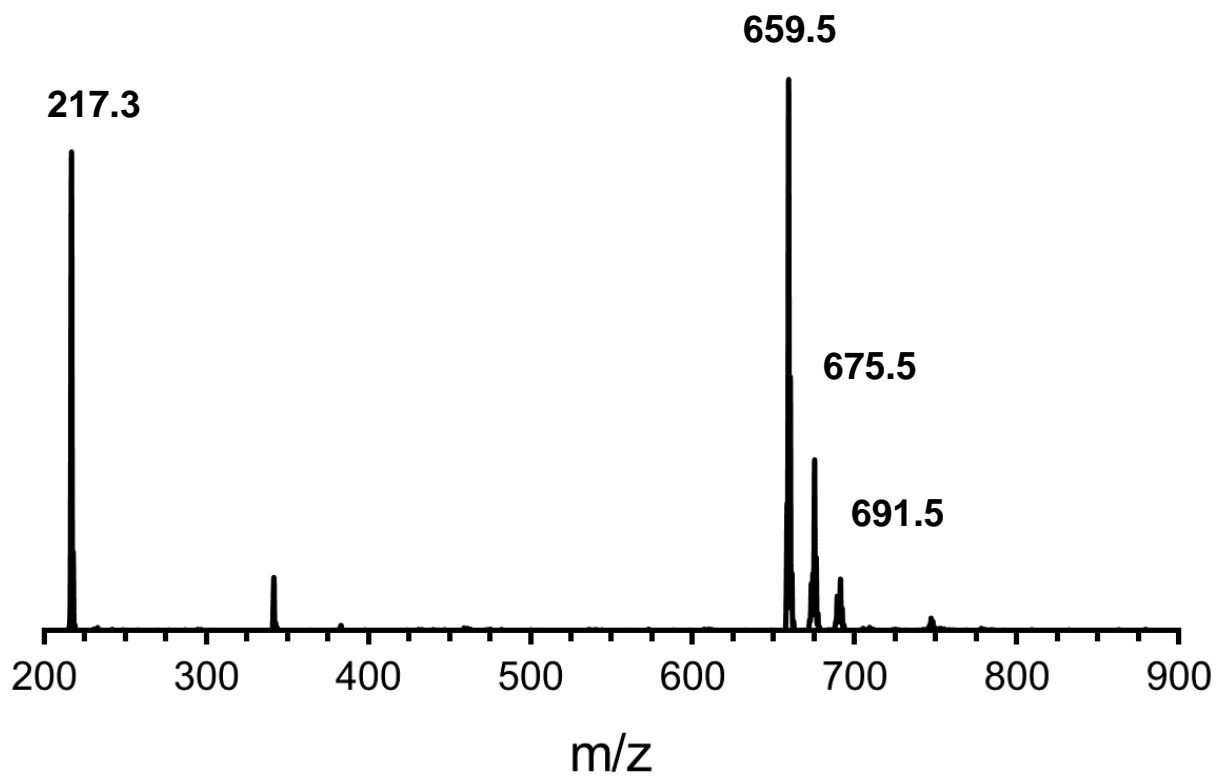

**Figure S27.** The MS data for the self-decay of **1** (2.5 mM in Et<sub>2</sub>O) after 24 h showing free pyrazole (m/z 217.3, [pz<sup>Ad,Me</sup>H]<sup>+</sup>), ligand (m/z 659.5, [H<sub>2</sub>Tp<sup>Ad,Me</sup>]<sup>+</sup>), single oxygen atom incorporation (m/z = 675.5, [H<sub>2</sub>OTp<sup>Ad,Me</sup>]<sup>+</sup>), and double oxygen atom incorporation (m/z = 691.5 [H<sub>2</sub>O<sub>2</sub>Tp<sup>Ad,Me</sup>]<sup>+</sup>).

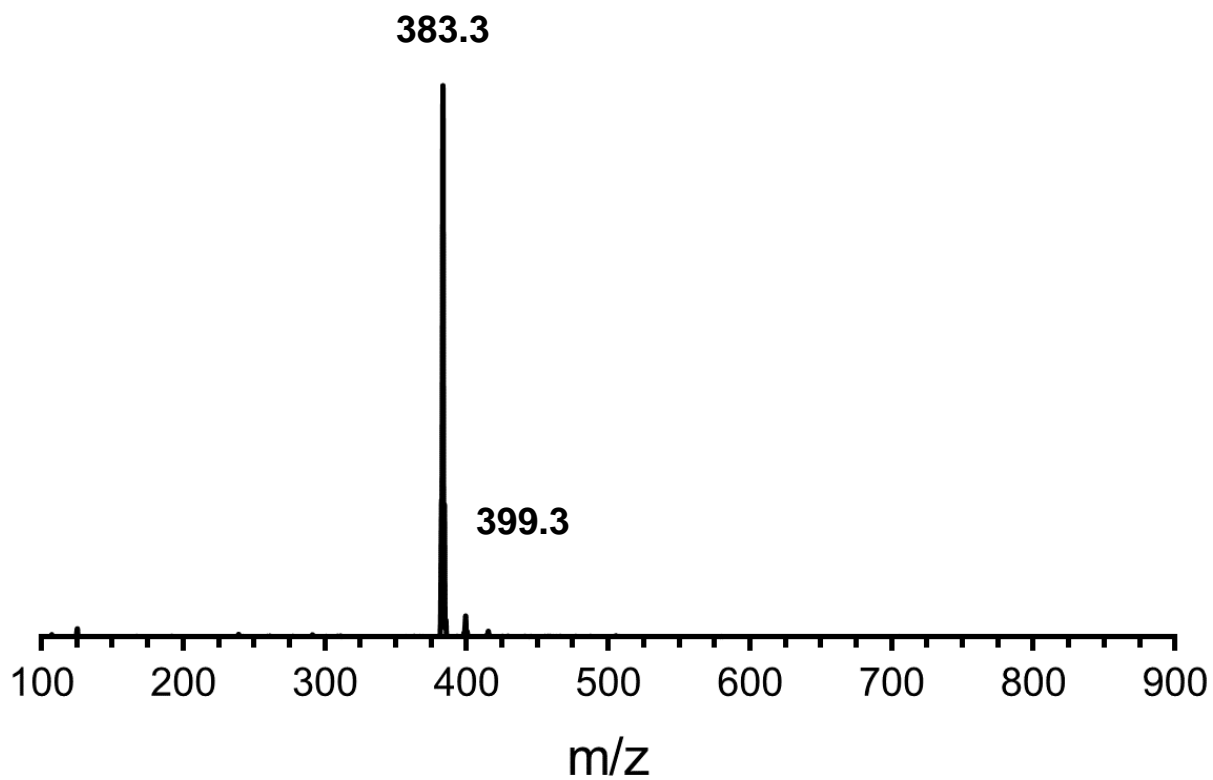

**Figure S28.** The MS data for the self-decay of **2** (isolated from the decay reaction in Et<sub>2</sub>O, after a 1 M HCl<sub>aq</sub> wash) after 24 h showing free ligand (m/z 383.3, [H<sub>2</sub>Tp<sup>tBu</sup>]<sup>+</sup>) and single oxygen-atom incorporation (m/z = 399.3, [H<sub>2</sub>OTp<sup>tBu</sup>]<sup>+</sup>).



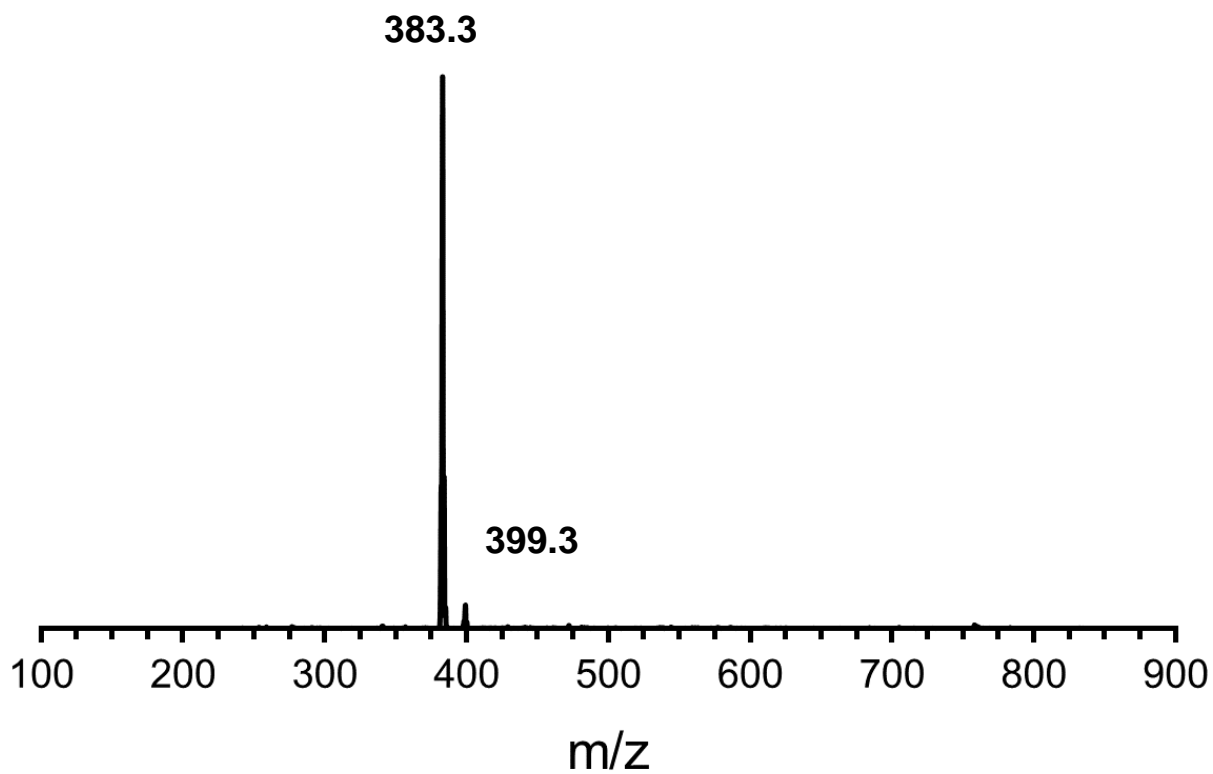

**Figure S29.** The MS data for the self-decay of **3** (2.5 mM in Et<sub>2</sub>O) after 24 h showing free ligand (m/z 383.3, [H<sub>2</sub>Tp<sup>tBu</sup>]<sup>+</sup>) and single oxygen atom incorporation (m/z = 399.3, [H<sub>2</sub>OTp<sup>tBu</sup>]<sup>+</sup>).

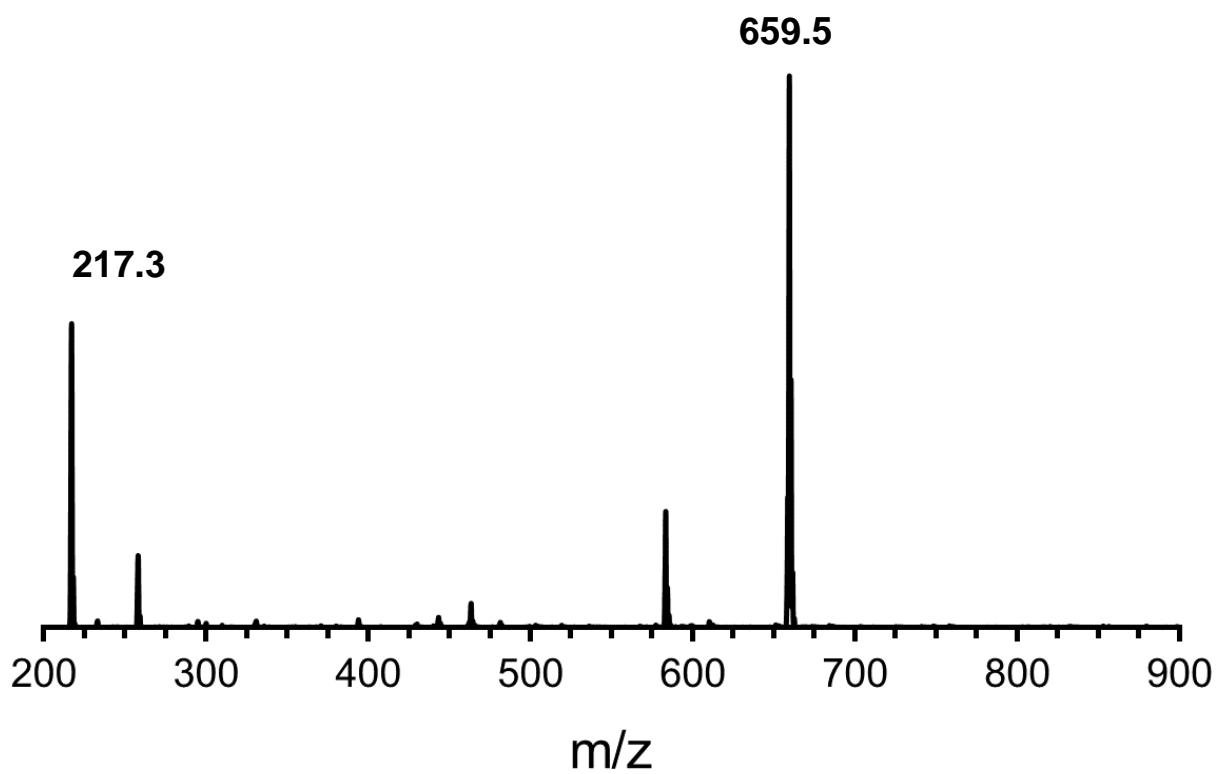

**Figure S30.** The MS data for the reaction of **1** with 10 equiv of  $\text{Sc}^{3+}$  ions showing free pyrazole ( $m/z$  217.3 [ $\text{pz}^{\text{Ad,Me}}]^+$ ) and ligand ( $m/z = 659.5$ , [ $\text{H}_2\text{Tp}^{\text{Ad,Me}}]^+$ ).

## 2.6 Electrochemistry

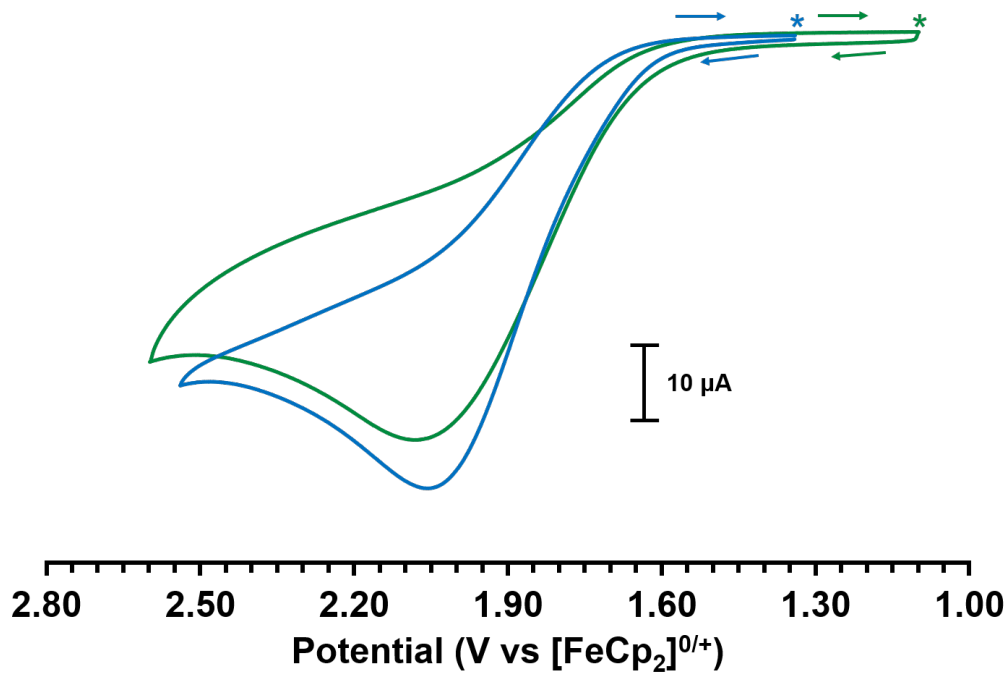

**Figure S31.** The cyclic voltammograms of **1** (green) and **2** (blue) showing irreversible oxidations at 2.07 and 2.05 V vs. [FeCp<sub>2</sub>]<sup>0/+</sup>. Conditions: 5 mM complex with 0.1 M [Bu<sub>4</sub>N][PF<sub>6</sub>] in DCM, scan rate 100 mV/s, glassy carbon working electrode with platinum wire counter electrode and silver wire as a pseudo-reference. Potentials referenced externally to the [FeCp<sub>2</sub>]<sup>0/+</sup>. Asterisks indicate starting potential and arrows indicate direction of sweep.

### 3.0 Kinetic Experiments

#### 3.1 General Procedure

Data for rate determination were collected in triplicate unless otherwise noted. In a typical experiment, a solution of Co complex was prepared in the appropriate solvent (Et<sub>2</sub>O, DCM, or CDCl<sub>3</sub>). Substrates were then either added as solids, liquids, or concentrated solutions in the same solvent to the Co complex solution to yield a final Co concentration of 2.5 mM. Reaction mixtures were then transferred to either air-free cuvettes fitted with Teflon plugs to be monitored by UV-vis spectroscopy or to J. Young NMR tubes to be monitored by <sup>1</sup>H NMR spectroscopy over the course of 24-36 hours. UV-vis spectral data were analyzed by plotting the natural log of the absorbance at a given wavelength at time *t* (*A<sub>t</sub>*) divided by initial absorbance (*A<sub>0</sub>*) vs time in seconds to give the observed rate *k<sub>obs</sub>* as the slope of the linear fit of the data. Experiments monitored by <sup>1</sup>H NMR spectroscopy were processed and analyzed using the MestReNova software package v 12.0.0-20080 by plotting the integral graph of a given resonance. The data were plotted as the natural log of the integration at time *t* (*A<sub>t</sub>*) divided by initial integration (*A<sub>0</sub>*) vs time in seconds to yield the observed rate *k<sub>obs</sub>* as the slope of the linear fit of the data. Plotting the *k<sub>obs</sub>* vs concentration of DHA yielded second order rate constants *k<sub>2</sub>* as the slope of the linear fit of the data.

Kinetic isotope effects (KIEs) were determined using GC-MS data. In a typical experiment, a solution of Co complex (2.5 mM) was prepared using a mixture of 50 equiv each of H<sub>4</sub>-DHA and D<sub>4</sub>-DHA in a 1:1 molar ratio (for a total of 100 equiv of DHA) dissolved in DCM. The solutions were allowed to stand for 62 hours before being filtered through a column of silica and then subjected to GC-MS analysis. The amount of anthracene present was calculated using a standard calibration curve. Using the relative ratios of the peak intensity at 178.1 and 180.1 m/z for H<sub>2</sub>-anthracene and D<sub>2</sub>-anthracene, respectively, the concentrations of proteo- and deuterio-anthracene were calculated for the starting 1:1 mixture and reaction solutions. After subtracting the quantity of anthracene and d<sub>2</sub>-anthracene present in the original mixture from the amount detected in the reaction solutions, the amount of each produced over the course of the reaction could be calculated. The ratio of H<sub>2</sub>-anthracene to D<sub>2</sub>-anthracene formed during the reaction gave the KIE value. In the case of **1**, <sup>s</sup>PhIO, <sup>s</sup>PhIO with Sc<sup>3+</sup>, and <sup>s</sup>PhIO with Na<sup>+</sup>, the amount of D<sub>2</sub>-anthracene produced gave unreasonable values within the error of the measurement. Instead of using the raw data, the standard deviation of the 1:1 mix was used to as a representative amount of D<sub>2</sub>-anthracene that may have been produced below a reasonable detection limit. This maximum amount of potential D<sub>2</sub>-anthracene provided estimates for the lower bounds of the KIE in these cases. The raw data is provided in **Tables S1** and **S3**, and the substituted data is provided in **Tables S2** and **S4**.

### 3.2 Kinetic Plots

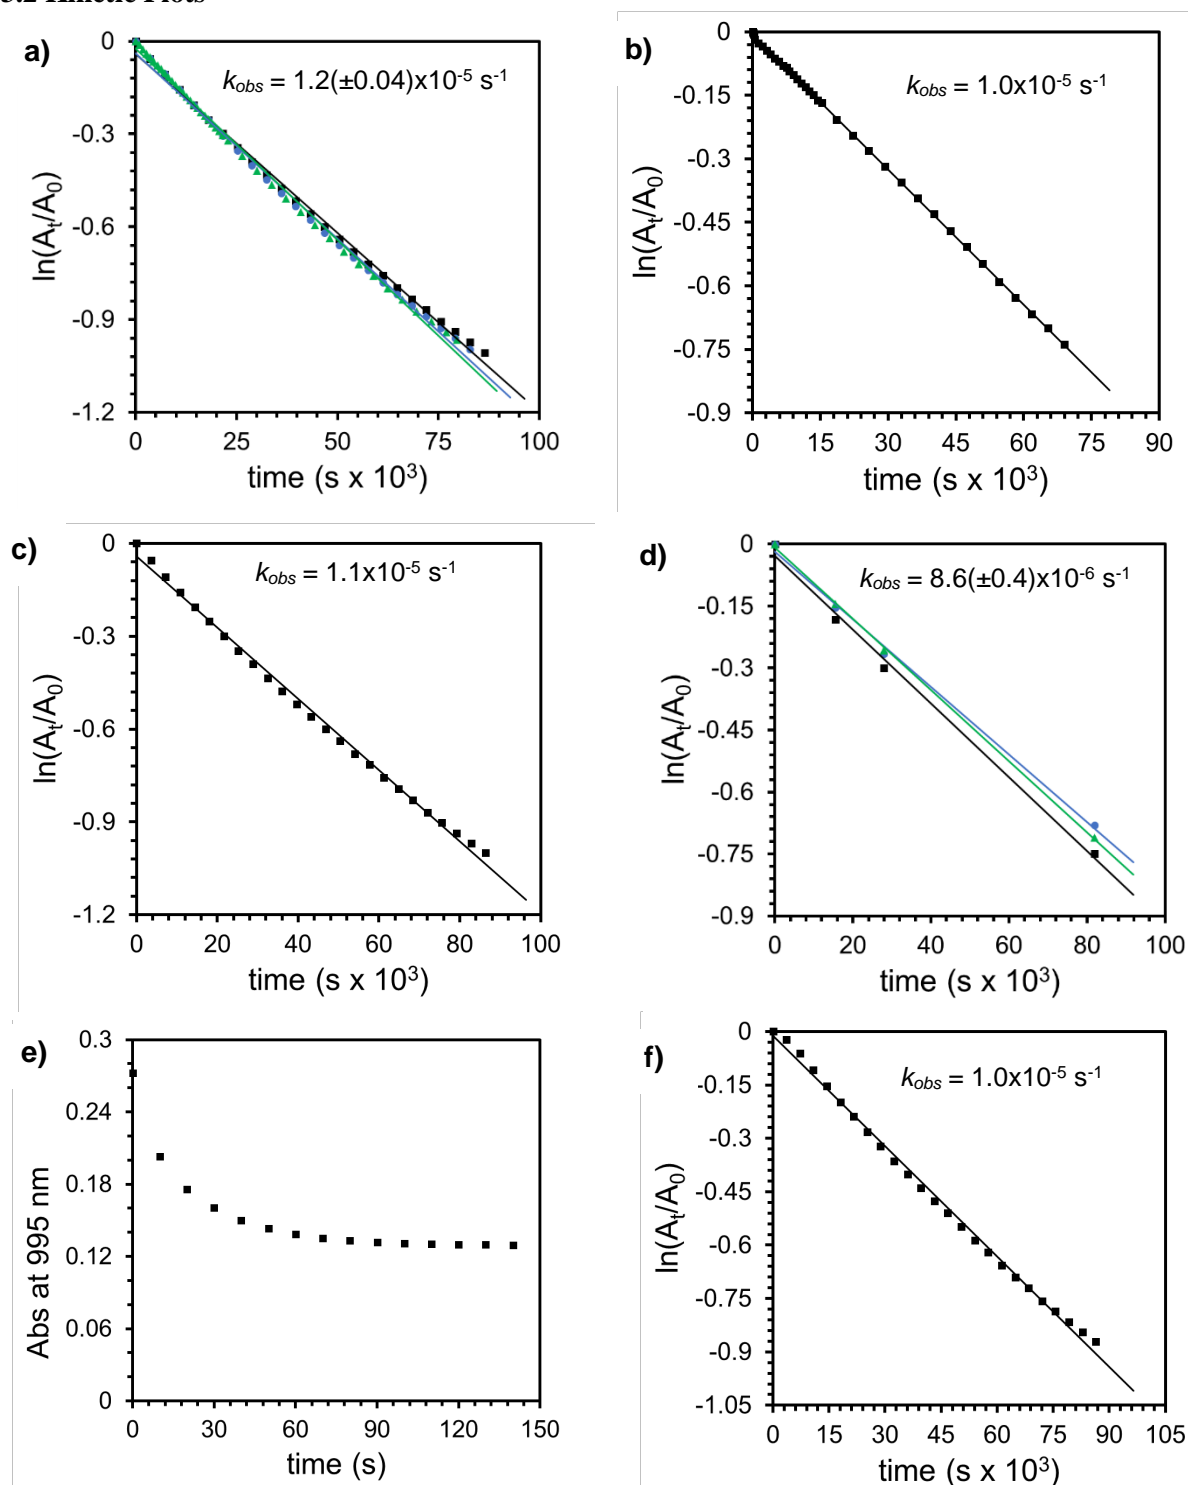

**Figure S32.** Kinetic data obtained for complex **1** (2.5 mM in Et<sub>2</sub>O) a) of the self-decay, b) with 10 equiv of DHA, c) with 10 equiv thioanisole, d) 100 equiv of DHA, e) with 10 equiv PMe<sub>3</sub>, and f) with 10 equiv <sup>s</sup>PhI. Experiments without errors were not collected in triplicate. Plot for the reaction of **1** with 10 equiv PMe<sub>3</sub> plotted as absorbance vs time as it did not follow pseudo-first order kinetics.

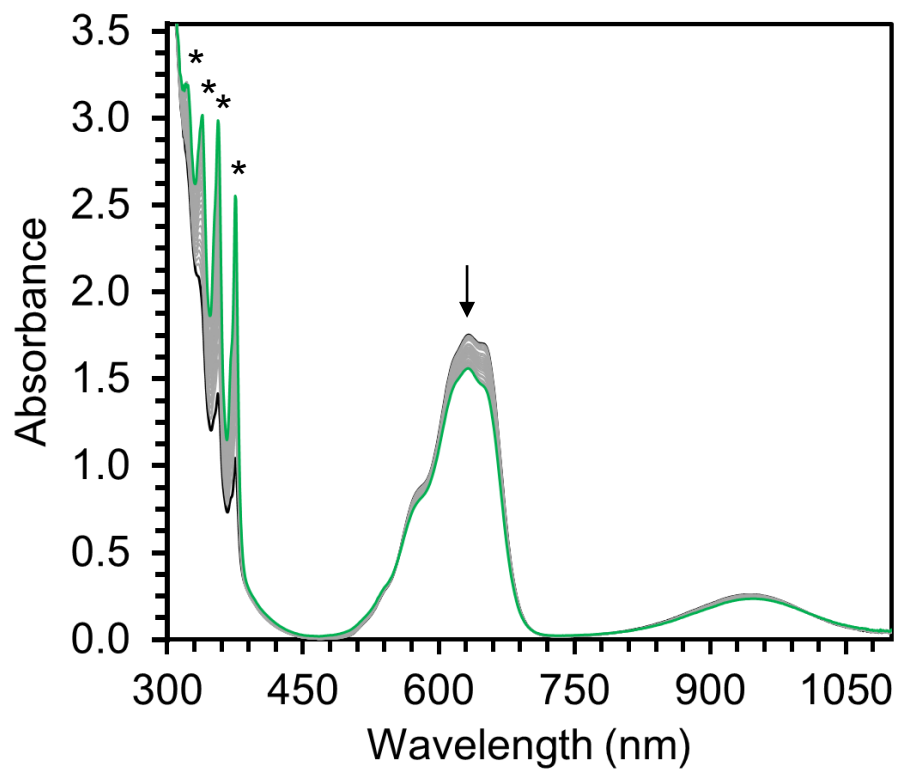

**Figure S33.** Representative plot of the decay of **2** (2.5 mM in Et<sub>2</sub>O) in the presence of 100 equiv of DHA showing both loss of **2** and growth of peaks corresponding to anthracene. Arrow indicates position of wavelength monitored for kinetics, asterisks indicate peaks for anthracene.

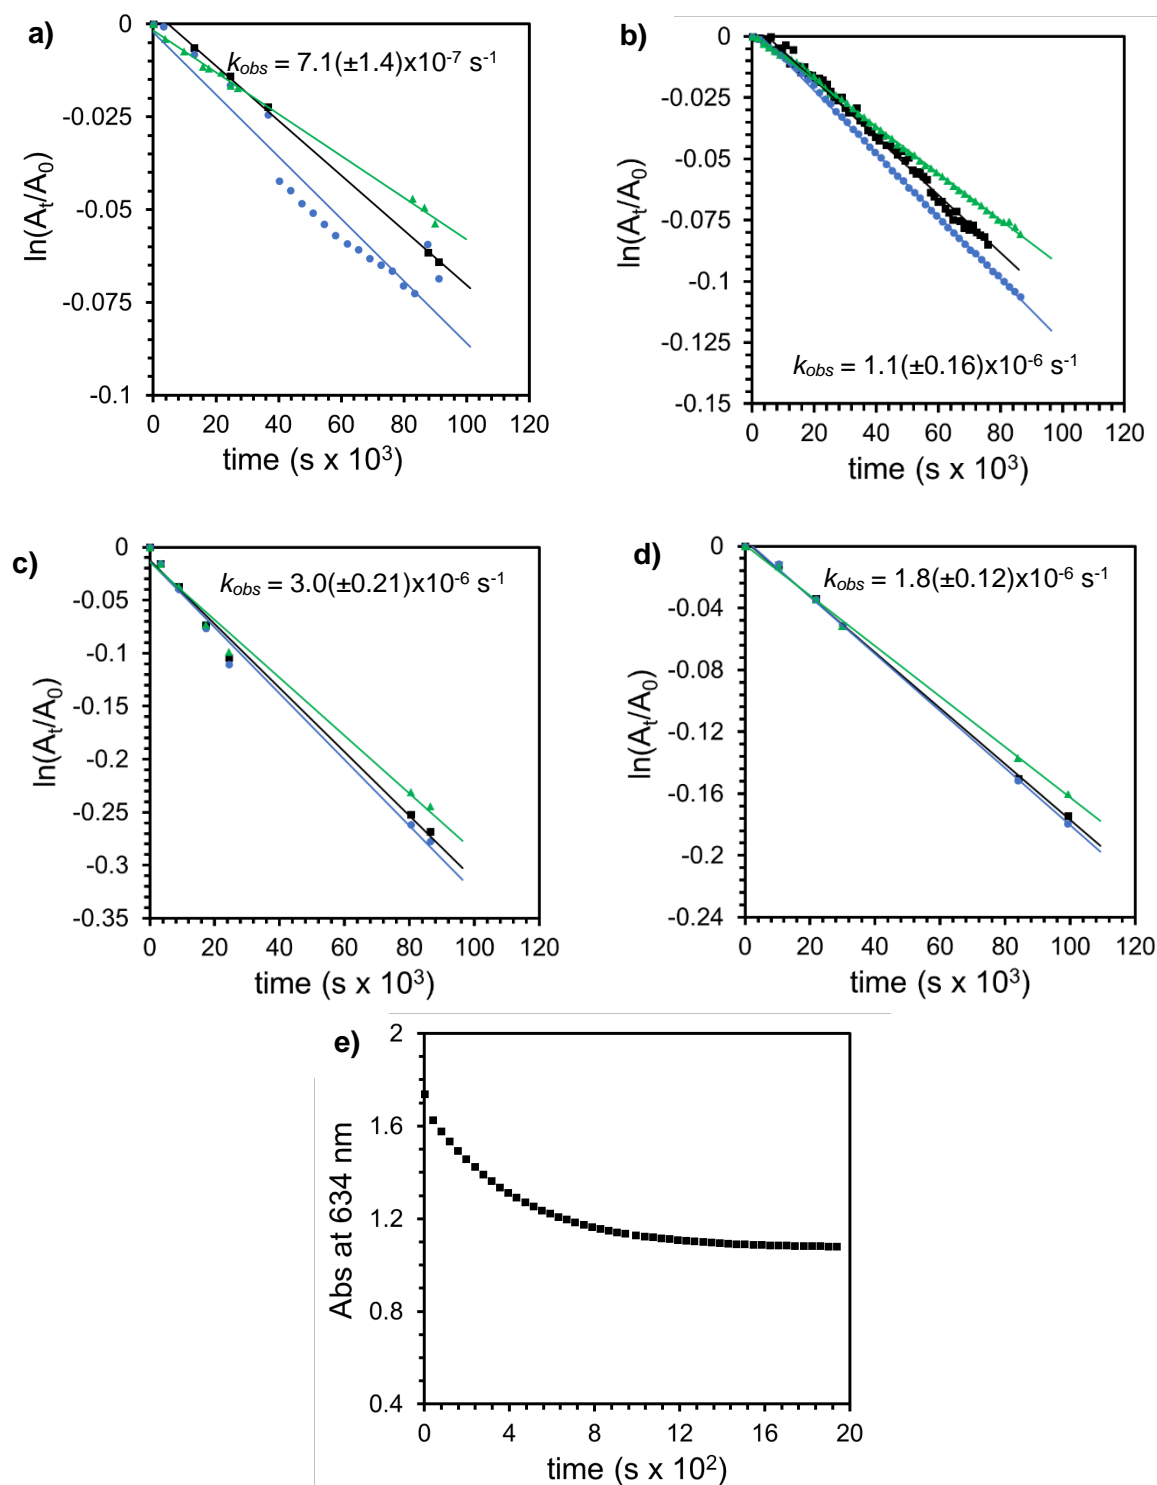

**Figure S34.** Kinetic data obtained for complex **2** (2.5 mM in Et<sub>2</sub>O) a) of the self-decay, b) with 10 equiv of thioanisole, c) with 10 equiv thioanisole and 20 equiv of <sup>s</sup>PhI, d) with 20 equiv <sup>s</sup>PhI, and e) with 10 equiv PPh<sub>3</sub>. Reaction of **2** with 10 equiv PPh<sub>3</sub> plotted as absorbance vs time as it did not follow pseudo-first order kinetics.

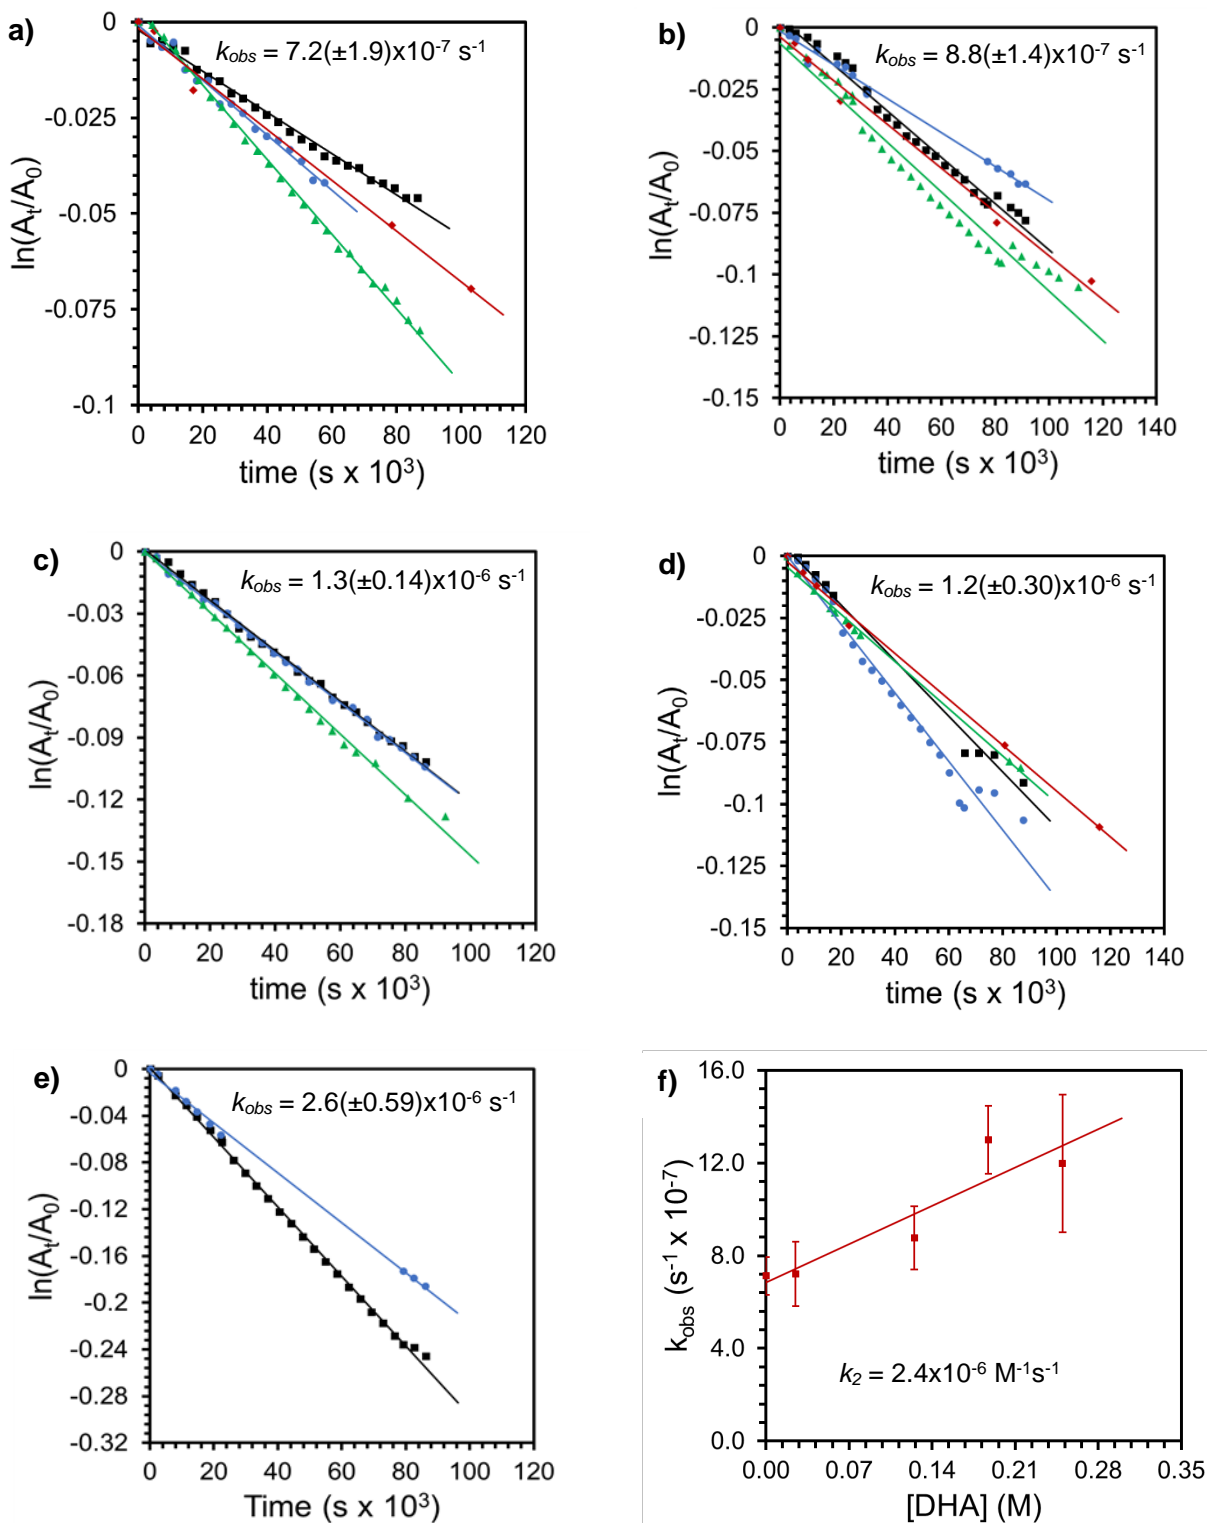

**Figure S35.** Kinetic data obtained for complex 2 (2.5 mM in Et<sub>2</sub>O) a) with 10 equiv DHA, b) with 50 equiv DHA, c) with 75 equiv DHA, d) with 100 equiv of DHA, and e) with 50 equiv DHA and 20 equiv of <sup>s</sup>PhI. f) Plot of  $k_{obs}$  vs [DHA] to determine the second order rate constant,  $k_2$ .



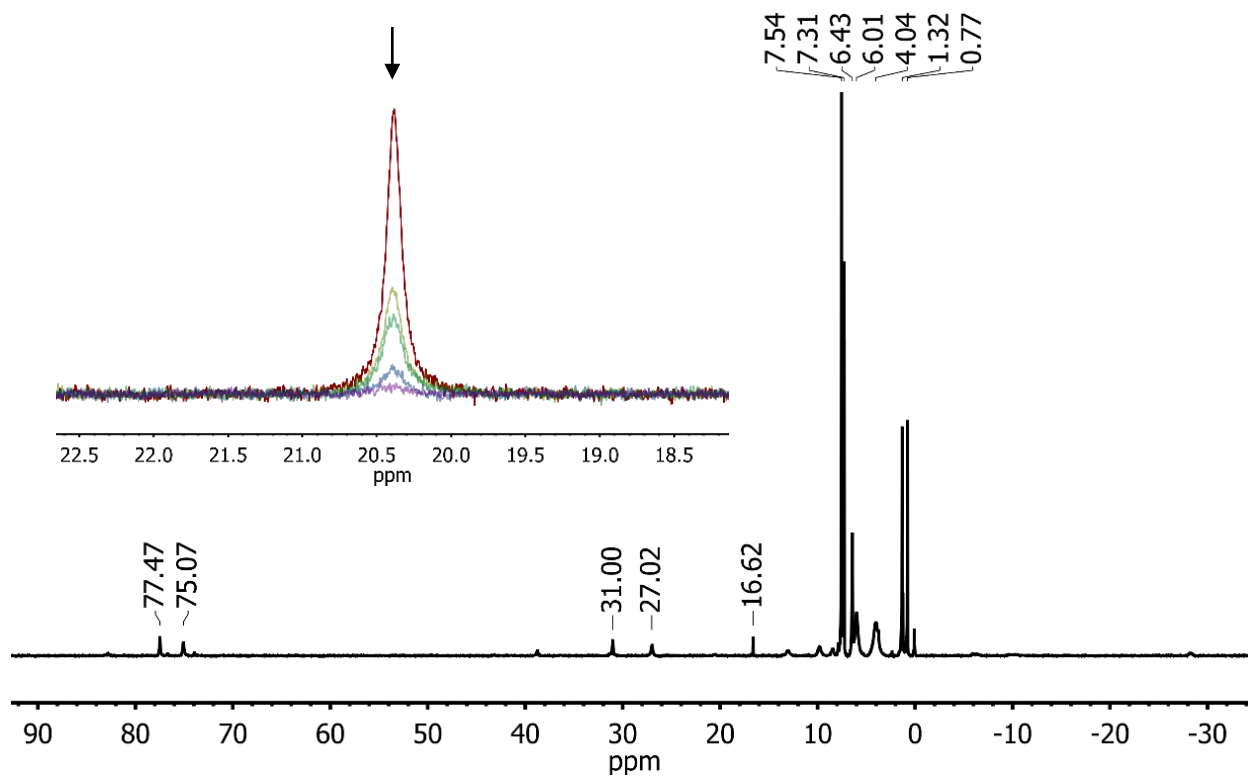

**Figure S36.** The  $^1\text{H}$  NMR spectrum of the decay of **3** in  $\text{CDCl}_3$  after 32 h at room temperature. Inset: overlay of the change in intensity of the 20.4 ppm resonance over time used to calculate  $k_{\text{obs}}$ .

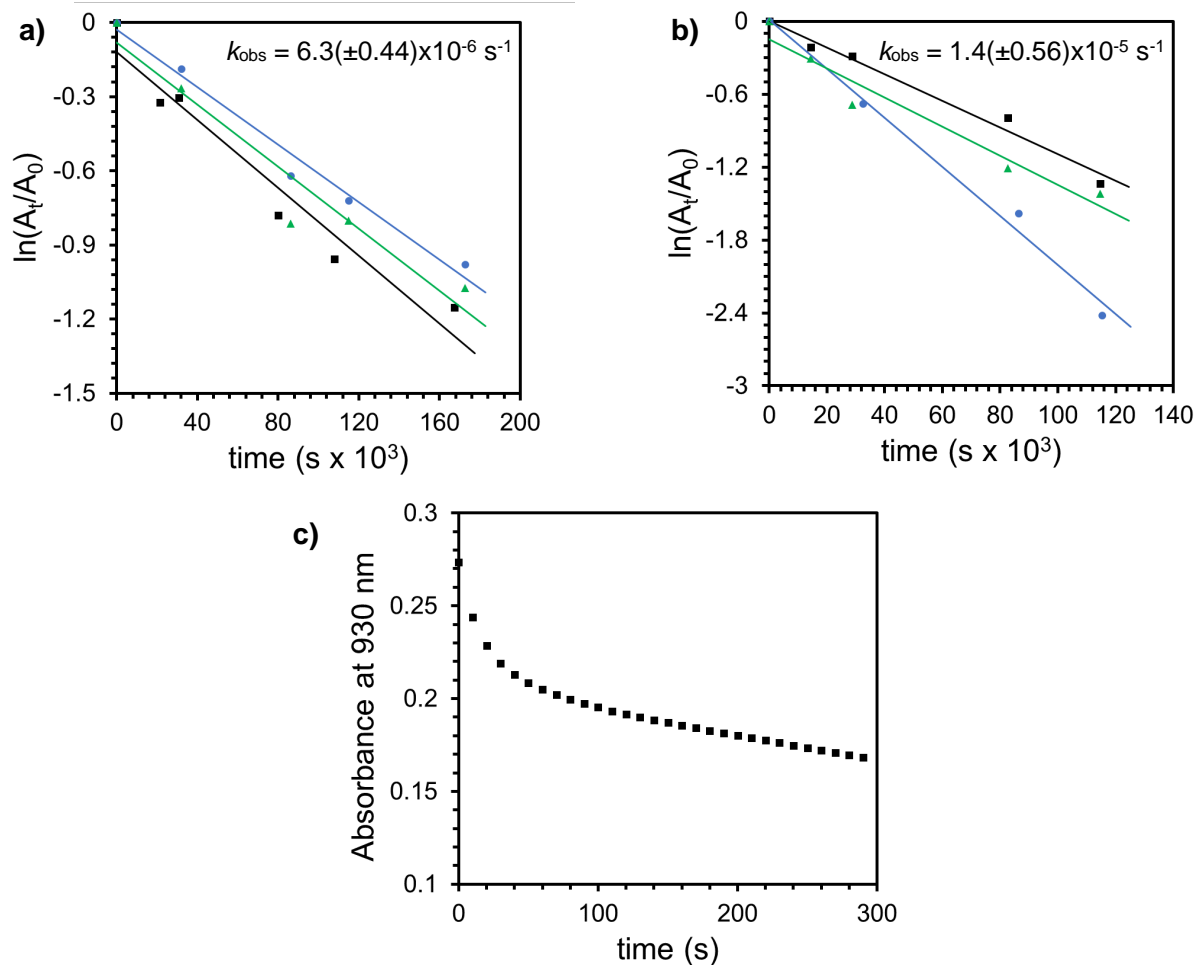

**Figure S37.** Kinetic data obtained for complex **3** (2.5 mM in CDCl<sub>3</sub>, monitoring the area of the 20.4 ppm resonance) a) for the self-decay, b) with 10 equiv thioanisole, and c) with 10 equiv PPh<sub>3</sub> (2.5 mM Co complex in Et<sub>2</sub>O). Plot of the reaction of **3** with 10 equiv PPh<sub>3</sub> shown as absorbance vs time as it did not fit pseudo-first order kinetics.

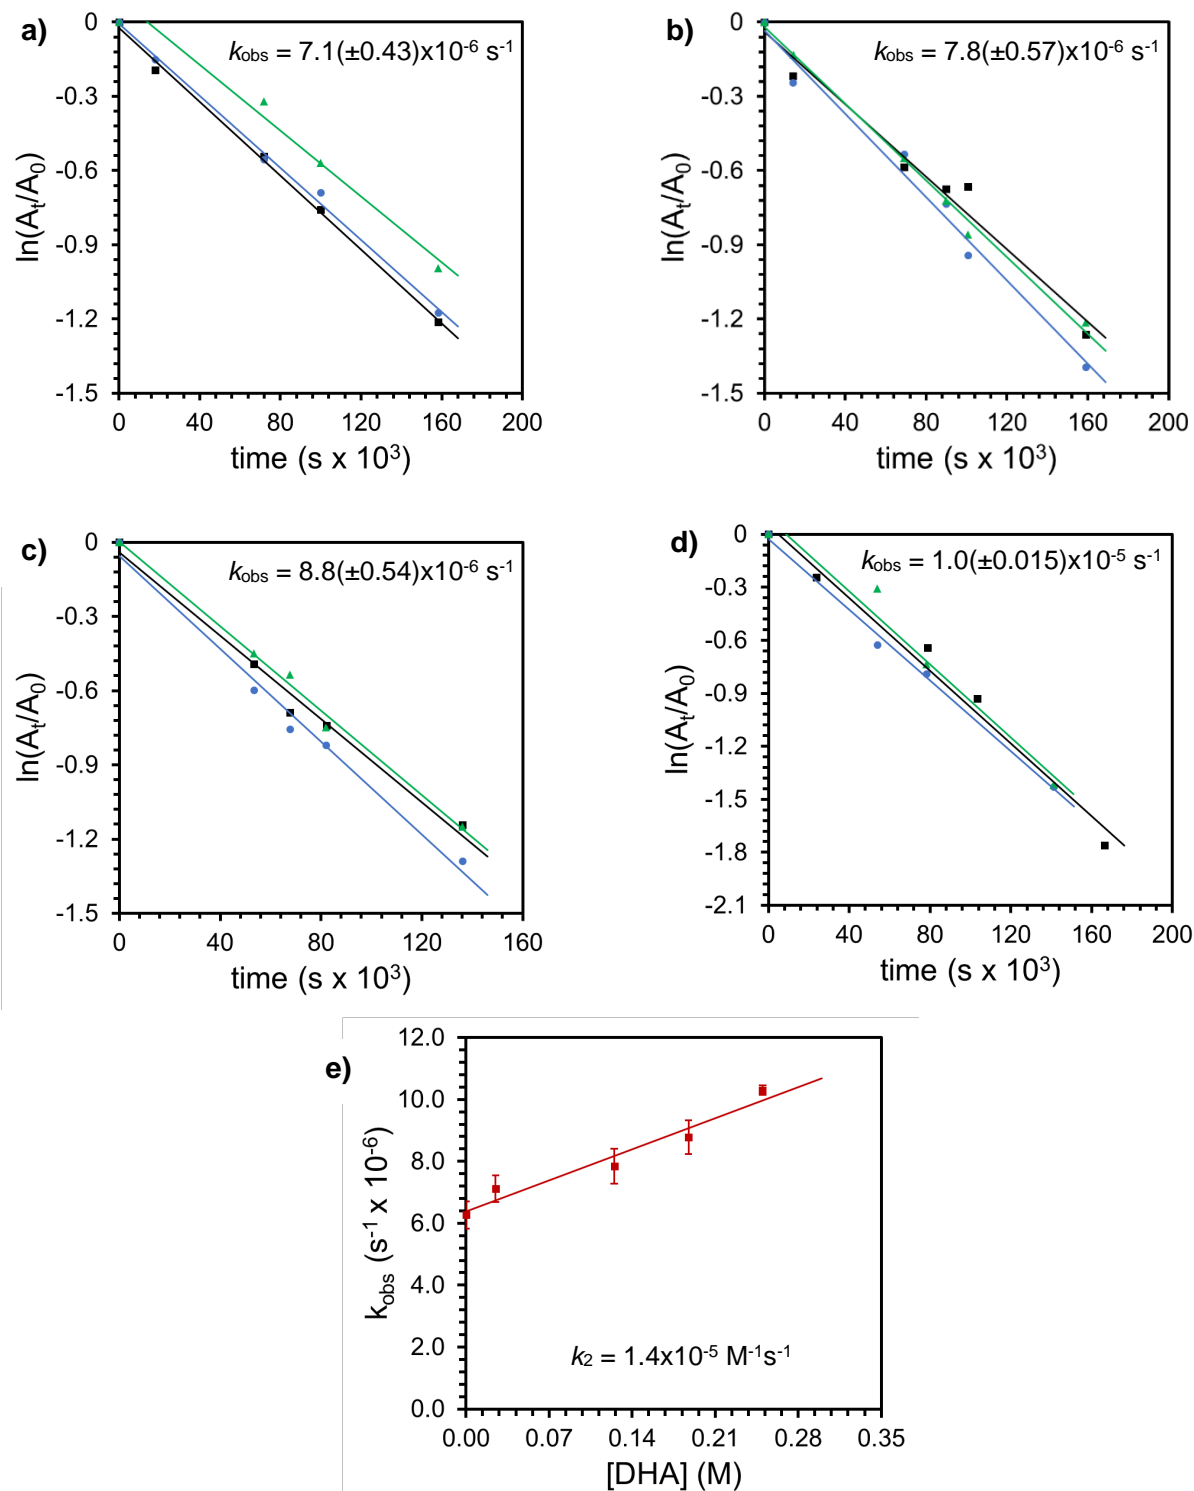

**Figure S38.** Kinetic data obtained for complex 3 (2.5 mM in  $\text{CDCl}_3$ , monitoring the area of the 20.4 ppm resonance) a) with 10 equiv DHA, b) with 50 equiv DHA, c) with 75 equiv DHA, and d) with 100 equiv of DHA and e) plot of  $k_{\text{obs}}$  vs [DHA] to determine the second order rate constant,  $k_2$ .

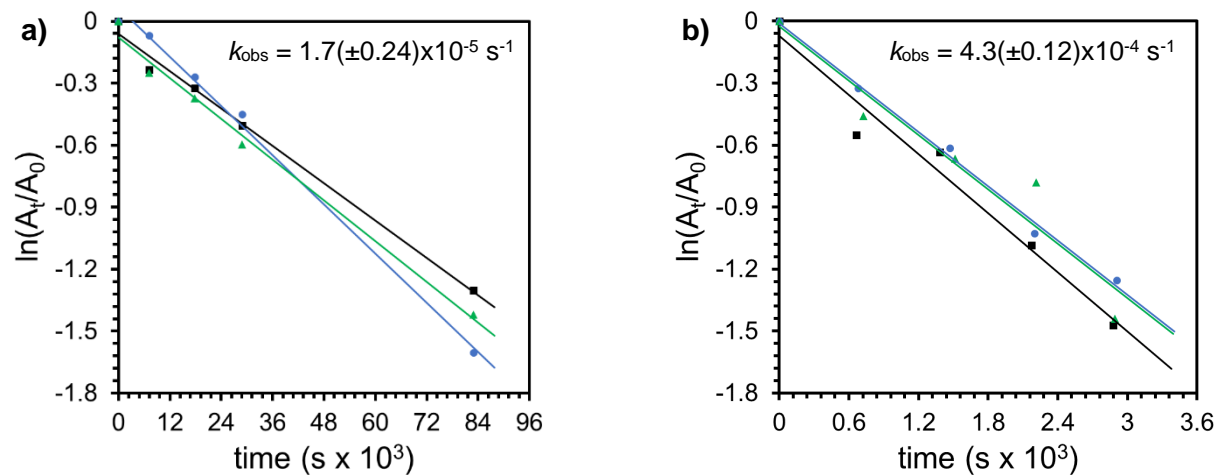

**Figure S39.** Kinetic data obtained for the background reaction of  $^5\text{PhIO}$  (2.5 mM in  $\text{CDCl}_3$ , monitoring the area of the 8.0 ppm resonance for loss of  $^5\text{PhIO}$ ) a) with 50 equiv DHA and b) with 10 equiv thioanisole.

### 3.3 Kinetic Isotope Effects

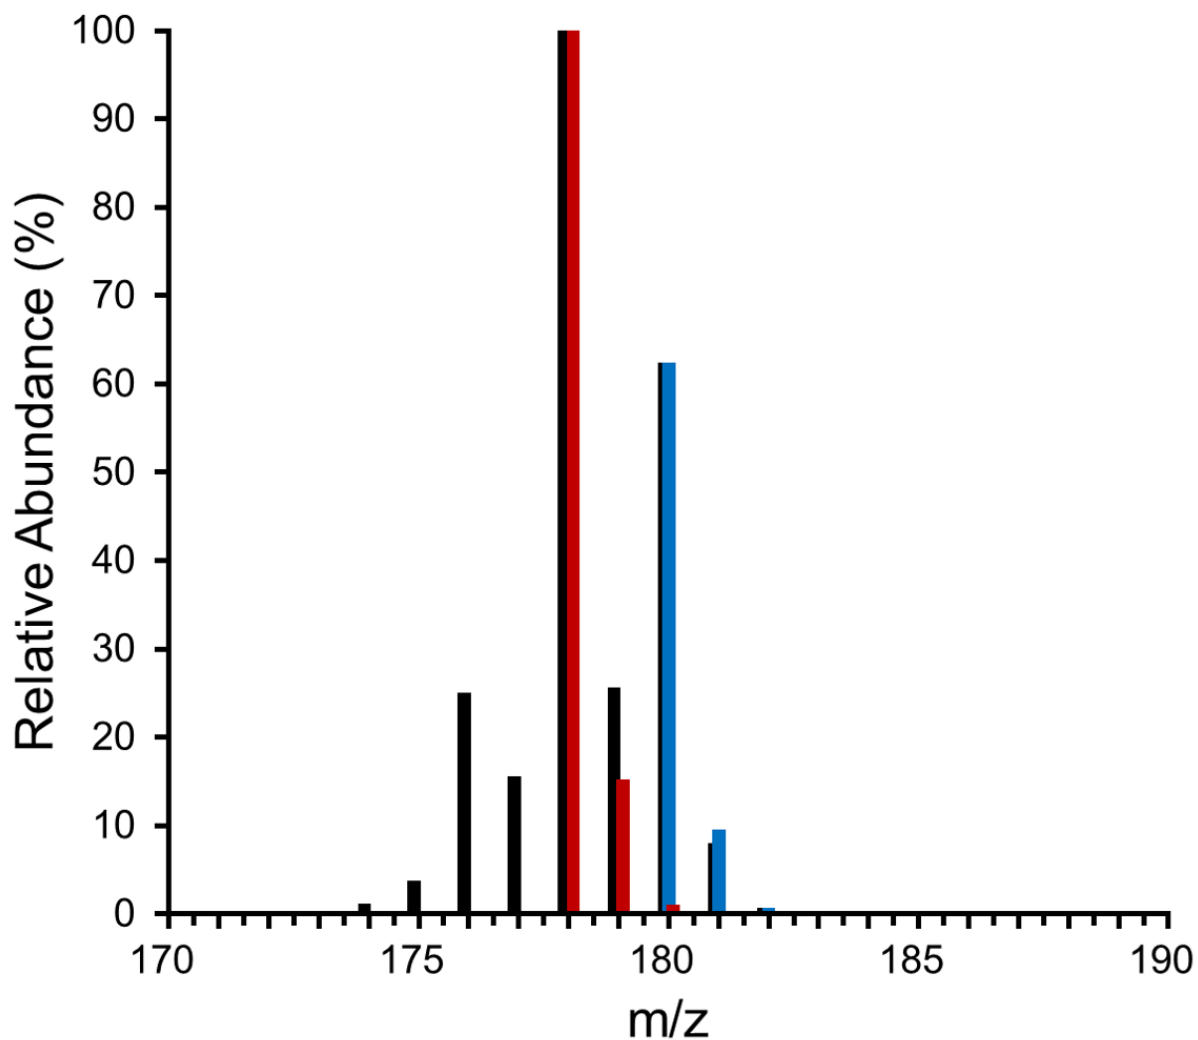

**Figure S40.** A representative MS trace for determination of the KIE from the reaction of **1** with a 1:1 molar ratio of H<sub>4</sub>-DHA:D<sub>4</sub>-DHA in DCM at 25 °C. Black bars are experimental data, red bars are isotope modeling of anthracene, and blue bars are isotope modeling of D<sub>2</sub>-anthracene.

| sample                  | Total<br>[anthracene]<br>mM | [anthracene]<br>detected mM |         | [anthracene]<br>Increase mM |         | KIE  | average<br>KIE |
|-------------------------|-----------------------------|-----------------------------|---------|-----------------------------|---------|------|----------------|
|                         |                             | proteo                      | deutero | proteo                      | deutero |      |                |
| <b>1:1 mix</b>          |                             |                             |         |                             |         |      |                |
| trial 1                 | 0.0087                      | 0.0024                      | 0.0063  | N/A                         | N/A     |      |                |
| trial 2                 | 0.0100                      | 0.0027                      | 0.0073  | N/A                         | N/A     |      |                |
| trial 3                 | 0.0103                      | 0.0029                      | 0.0074  | N/A                         | N/A     |      |                |
| <b>1</b>                |                             |                             |         |                             |         |      |                |
| Trial 1                 | 0.0152                      | 0.0094                      | 0.0059  | 0.0069                      | -0.0004 | -    |                |
| Trial 2                 | 0.0164                      | 0.0100                      | 0.0064  | 0.0074                      | -0.0009 | -    |                |
| Trial 3                 | 0.0160                      | 0.0098                      | 0.0062  | 0.0069                      | -0.0012 | -    | -              |
| <b>2</b>                |                             |                             |         |                             |         |      |                |
| Trial 1                 | 0.0259                      | 0.0188                      | 0.0071  | 0.0164                      | 0.0008  | 20.0 |                |
| Trial 2                 | 0.0318                      | 0.0231                      | 0.0088  | 0.0204                      | 0.0015  | 13.7 |                |
| Trial 3                 | 0.0365                      | 0.0266                      | 0.0099  | 0.0237                      | 0.0025  | 9.5  | 14(±5)         |
| <b>3</b>                |                             |                             |         |                             |         |      |                |
| Trial 1                 | 0.0253                      | 0.0174                      | 0.0079  | 0.0150                      | 0.0016  | 9.4  |                |
| Trial 2                 | 0.0304                      | 0.0213                      | 0.0091  | 0.0187                      | 0.0018  | 10.3 |                |
| Trial 3                 | 0.0332                      | 0.0231                      | 0.0100  | 0.0203                      | 0.0026  | 7.8  | 9(±1)          |
| <b><sup>s</sup>PhIO</b> |                             |                             |         |                             |         |      |                |
| Trial 1                 | 0.0107                      | 0.0042                      | 0.0066  | 0.0017                      | 0.0003  | 5.8  |                |
| Trial 2                 | 0.0119                      | 0.0046                      | 0.0073  | 0.0019                      | 0.0000  | -    |                |
| Trial 3                 | 0.0122                      | 0.0048                      | 0.0075  | 0.0019                      | 0.0000  | -    | -              |

**Table S1:** Raw data and KIE values determined for the reactions of **1**, **2**, **3**, and <sup>s</sup>PhIO with a 250 mM 1:1 mixture of H<sub>4</sub>-DHA:D<sub>4</sub>-DHA in DCM.

| sample                  | Total<br>[anthracene]<br>mM | [anthracene]<br>mM |         | [anthracene]<br>Increase mM |         | KIE   | average KIE |
|-------------------------|-----------------------------|--------------------|---------|-----------------------------|---------|-------|-------------|
|                         |                             | proteo             | deutero | proteo                      | deutero |       |             |
| <b>1:1 mix</b>          |                             |                    |         |                             |         |       |             |
| trial 1                 | 0.0087                      | 0.0024             | 0.0063  | N/A                         | N/A     |       |             |
| trial 2                 | 0.0100                      | 0.0027             | 0.0073  | N/A                         | N/A     |       |             |
| trial 3                 | 0.0103                      | 0.0029             | 0.0074  | N/A                         | N/A     |       |             |
| <b>1</b>                |                             |                    |         |                             |         |       |             |
| Trial 1                 | 0.0152                      | 0.0094             | 0.0059  | 0.0069                      | 0.0006  | >11.6 |             |
| Trial 2                 | 0.0164                      | 0.0100             | 0.0064  | 0.0074                      | 0.0006  | >12.3 |             |
| Trial 3                 | 0.0160                      | 0.0098             | 0.0062  | 0.0069                      | 0.0006  | >11.5 | >12         |
| <b>2</b>                |                             |                    |         |                             |         |       |             |
| Trial 1                 | 0.0259                      | 0.0188             | 0.0071  | 0.0164                      | 0.0008  | 20.0  |             |
| Trial 2                 | 0.0318                      | 0.0231             | 0.0088  | 0.0204                      | 0.0015  | 13.7  |             |
| Trial 3                 | 0.0365                      | 0.0266             | 0.0099  | 0.0237                      | 0.0025  | 9.5   | 14(±5)      |
| <b>3</b>                |                             |                    |         |                             |         |       |             |
| Trial 1                 | 0.0253                      | 0.0174             | 0.0079  | 0.0150                      | 0.0016  | 9.4   |             |
| Trial 2                 | 0.0304                      | 0.0213             | 0.0091  | 0.0187                      | 0.0018  | 10.3  |             |
| Trial 3                 | 0.0332                      | 0.0231             | 0.0100  | 0.0203                      | 0.0026  | 7.8   | 9(±1)       |
| <b><sup>s</sup>PhIO</b> |                             |                    |         |                             |         |       |             |
| Trial 1                 | 0.0107                      | 0.0042             | 0.0066  | 0.0017                      | 0.0006  | >2.9  |             |
| Trial 2                 | 0.0119                      | 0.0046             | 0.0073  | 0.0019                      | 0.0006  | >3.2  |             |
| Trial 3                 | 0.0122                      | 0.0048             | 0.0075  | 0.0019                      | 0.0006  | >3.2  | >3          |

**Table S2:** KIE values determined for the reactions of **1**, **2**, **3**, and <sup>s</sup>PhIO with DHA using a minimum detectable value to replace increases in D<sub>2</sub>-anthracene that are smaller than the standard deviation from the 1:1 mix. The average concentration of D<sub>2</sub>-anthracene in the 1:1 mix is 0.007(±0.0006) mM. Shown in red are cases where the standard deviation of 0.0006 mM was used as the maximum amount of D<sub>2</sub>-anthracene that could be produced but not measured above error. Using this maximum value provides a lower bound for the KIE.

| sample                                    | Total<br>[anthracene]<br>mM | [anthracene]<br>mM |         | [anthracene]<br>Increase mM |         | KIE | average KIE |
|-------------------------------------------|-----------------------------|--------------------|---------|-----------------------------|---------|-----|-------------|
|                                           |                             | proteo             | deutero | proteo                      | deutero |     |             |
| <b>1:1 mix</b>                            |                             |                    |         |                             |         |     |             |
| trial 1                                   | 0.0385                      | 0.0150             | 0.0236  | N/A                         | N/A     |     |             |
| trial 2                                   | 0.0376                      | 0.0140             | 0.0236  | N/A                         | N/A     |     |             |
| trial 3                                   | 0.0415                      | 0.0154             | 0.0260  | N/A                         | N/A     |     |             |
| <b><sup>s</sup>PhIO + Sc<sup>3+</sup></b> |                             |                    |         |                             |         |     |             |
| Trial 1                                   | 0.142                       | 0.120              | .0215   | 0.106                       | -0.0021 | -   |             |
| Trial 2                                   | 0.111                       | 0.0942             | 0.0170  | 0.0802                      | -0.0065 | -   |             |
| Trail 3                                   | 0.136                       | 0.115              | 0.0206  | 0.0999                      | -0.0055 | -   | -           |
| <b><sup>s</sup>PhIO + Na<sup>+</sup></b>  |                             |                    |         |                             |         |     |             |
| Trial 1                                   | 0.0505                      | 0.0310             | 0.0195  | 0.0160                      | -0.0041 | -   |             |
| Trial 2                                   | 0.0458                      | 0.0282             | 0.0175  | 0.0142                      | -0.0060 | -   |             |
| Trial 3                                   | 0.0506                      | 0.0313             | 0.0193  | 0.0159                      | -0.0068 | -   | -           |

**Table S3:** Raw GCMS data for the reactions of <sup>s</sup>PhIO in the presence of Lewis acids with DHA for KIE calculations. Conditions: 2.5 mM <sup>s</sup>PhIO, 2.5 mM Lewis acid, and 250 mM of 1:1 H<sub>4</sub>-DHA:D<sub>4</sub>-DHA mixture in DCM, left to stir for 65 h at room temperature.



| sample                                    | Total [anthracene] mM | [anthracene] mM |         | [anthracene] Increase mM |         | KIE | average KIE |
|-------------------------------------------|-----------------------|-----------------|---------|--------------------------|---------|-----|-------------|
|                                           |                       | proteo          | deutero | proteo                   | deutero |     |             |
| <b>1:1 mix</b>                            |                       | proteo          | deutero | proteo                   | deutero |     |             |
| trial 1                                   | 0.0385                | 0.0150          | 0.0236  | N/A                      | N/A     |     |             |
| trial 2                                   | 0.0376                | 0.0140          | 0.0236  | N/A                      | N/A     |     |             |
| trial 3                                   | 0.0415                | 0.0154          | 0.0260  | N/A                      | N/A     |     |             |
| <b><sup>s</sup>PhIO + Sc<sup>3+</sup></b> |                       |                 |         |                          |         |     |             |
| Trial 1                                   | 0.142                 | 0.120           | .0215   | 0.106                    | 0.0014  | 74  |             |
| Trial 2                                   | 0.111                 | 0.0942          | 0.0170  | 0.0802                   | 0.0014  | 56  |             |
| Trail 3                                   | 0.136                 | 0.115           | 0.0206  | 0.0999                   | 0.0014  | 70  | >66         |
| <b><sup>s</sup>PhIO + Na<sup>+</sup></b>  |                       |                 |         |                          |         |     |             |
| Trial 1                                   | 0.0505                | 0.0310          | 0.0195  | 0.0160                   | 0.0014  | 11  |             |
| Trial 2                                   | 0.0458                | 0.0282          | 0.0175  | 0.0142                   | 0.0014  | 10  |             |
| Trial 3                                   | 0.0506                | 0.0313          | 0.0193  | 0.0159                   | 0.0014  | 11  | >11         |

**Table S4:** KIE values determined for the reactions of <sup>s</sup>PhIO with DHA in the presence of Lewis acids using a minimum detectable value to replace increases in D<sub>2</sub>-anthracene that are smaller than the standard deviation from the 1:1 mix. The average concentration of D<sub>2</sub>-anthracene in the 1:1 mix is 0.024(±0.0014) mM. Shown in red are cases where the standard deviation of 0.0014 mM was used as the maximum amount of D<sub>2</sub>-anthracene that could be produced but not measured above error. Using this maximum value provides a lower bound for the KIE.

## 4.0 X-ray Crystallography

### 4.1 General Descriptions

The diffraction data for **3** were measured at 100 K on a Bruker D8 fixed-chi with PILATUS1M (CdTe) pixel array detector (synchrotron radiation,  $\lambda = 0.41328 \text{ \AA}$  (30 KeV)) at the Chem-MatCARS 15-ID-B beamline at the Advanced Photon Source (Argonne National Laboratory). The diffraction data for **1**, **2**, **4**, **5**, and **6** were measured at 100 K on a Bruker D8 VENTURE diffractometer equipped with a microfocus Mo-target X-ray tube ( $\lambda = 0.71073 \text{ \AA}$ ) and PHOTON 100 CMOS detector. Data reduction and integration were performed with the Bruker APEX3 software package (Bruker AXS, version 2017.3-0, 2018). Data were scaled and corrected for absorption effects using the multi-scan procedure as implemented in SADABS (Bruker AXS, version 2014/5).<sup>[8]</sup> The structures were solved by SHELXT (Version 2014/5)<sup>[9]</sup> and refined by a full-matrix least-squares procedure using OLEX2 (XL refinement program version 2018/1).<sup>[10,11]</sup> Crystallographic data and details of the data collection and structure refinement are listed in Section 4.4 of this supplementary information.

## 4.2 Structures

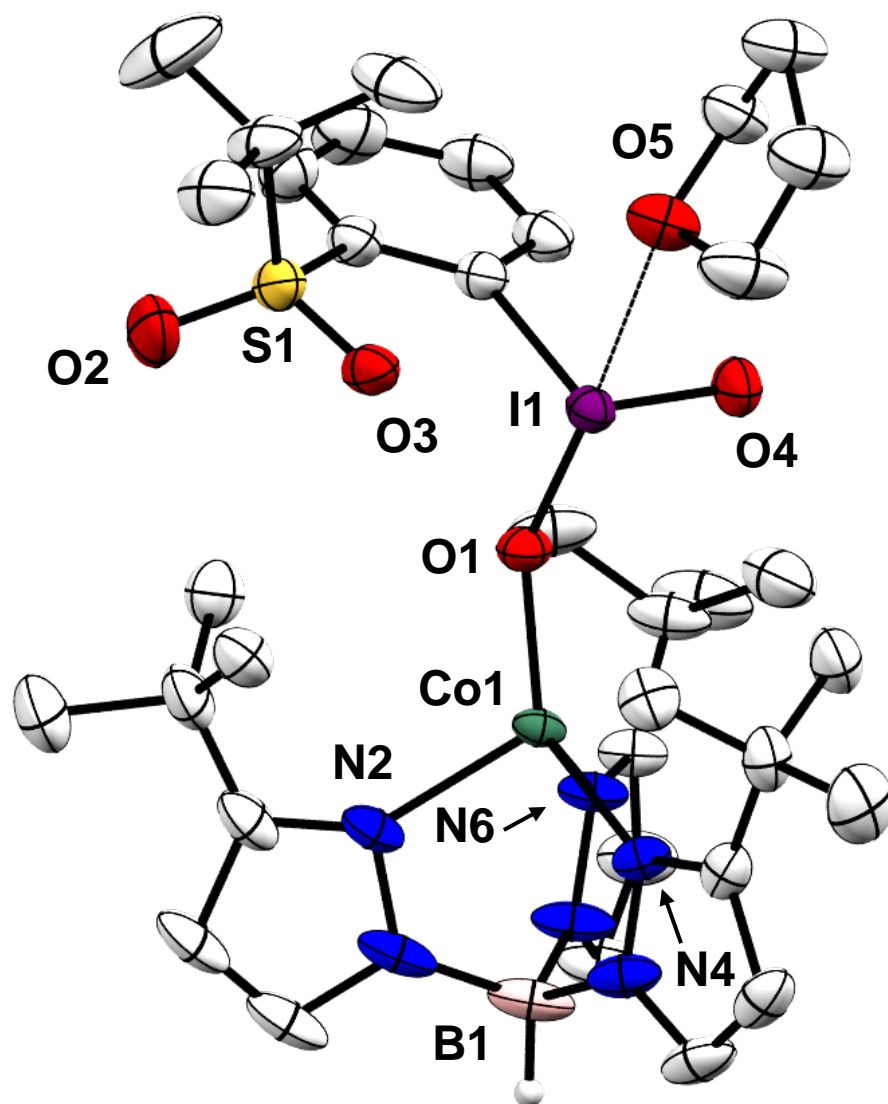

**Figure S41.** Structure of **3** showing the secondary interaction of a THF molecule with the iodine center of the bound <sup>3</sup>PhIO<sub>2</sub> ligand. The I1-O5 distance is 2.558(4) Å. Thermal ellipsoids shown at 50% probability and counter anion, other solvent, and H-atoms other than B-H omitted for clarity.

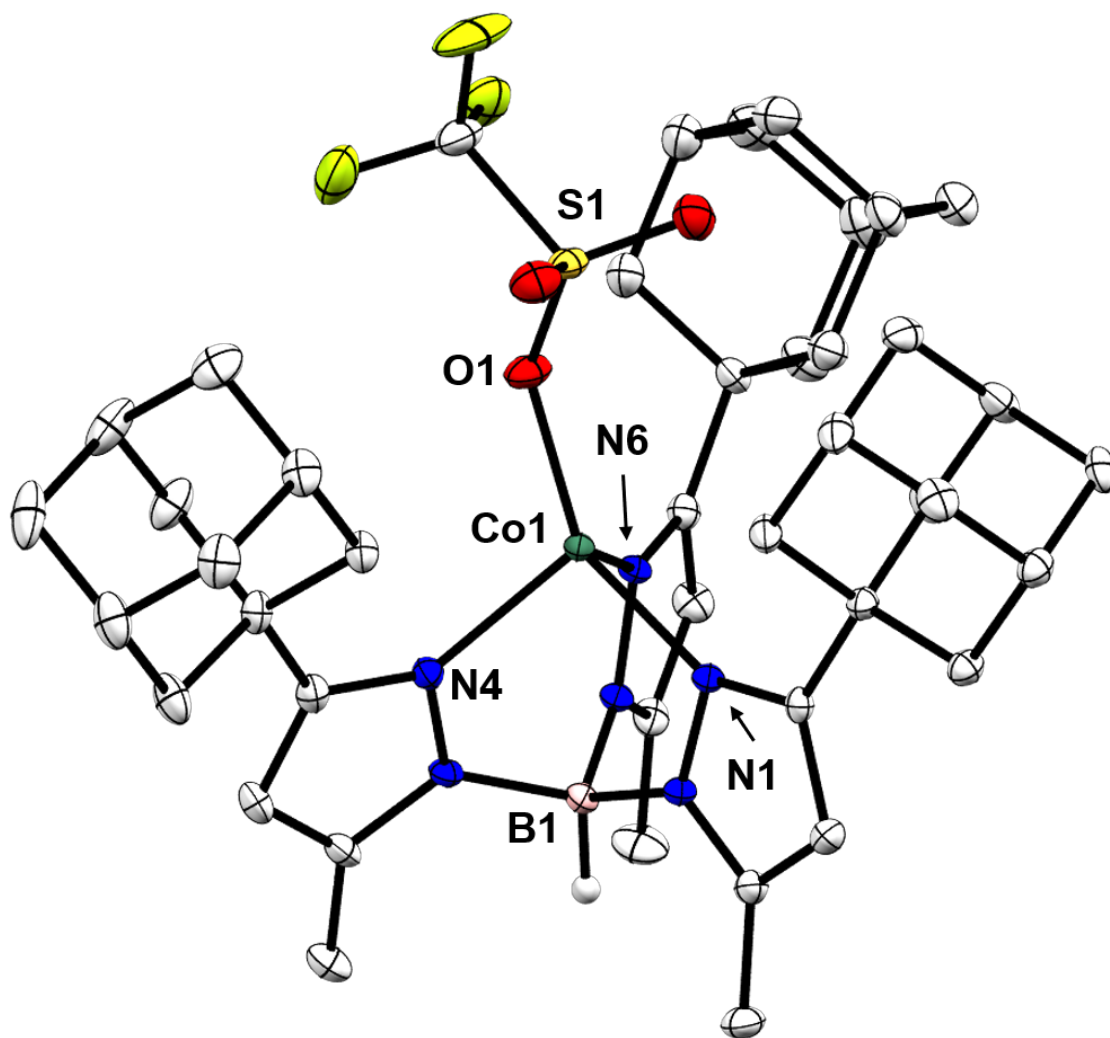

**Figure S42.** Depiction of the molecular structure of **4** determined by X-ray diffraction. Only one of the independent molecules is shown. Thermal ellipsoids shown at 50% probability. H-atoms other than B-H have been omitted for clarity.

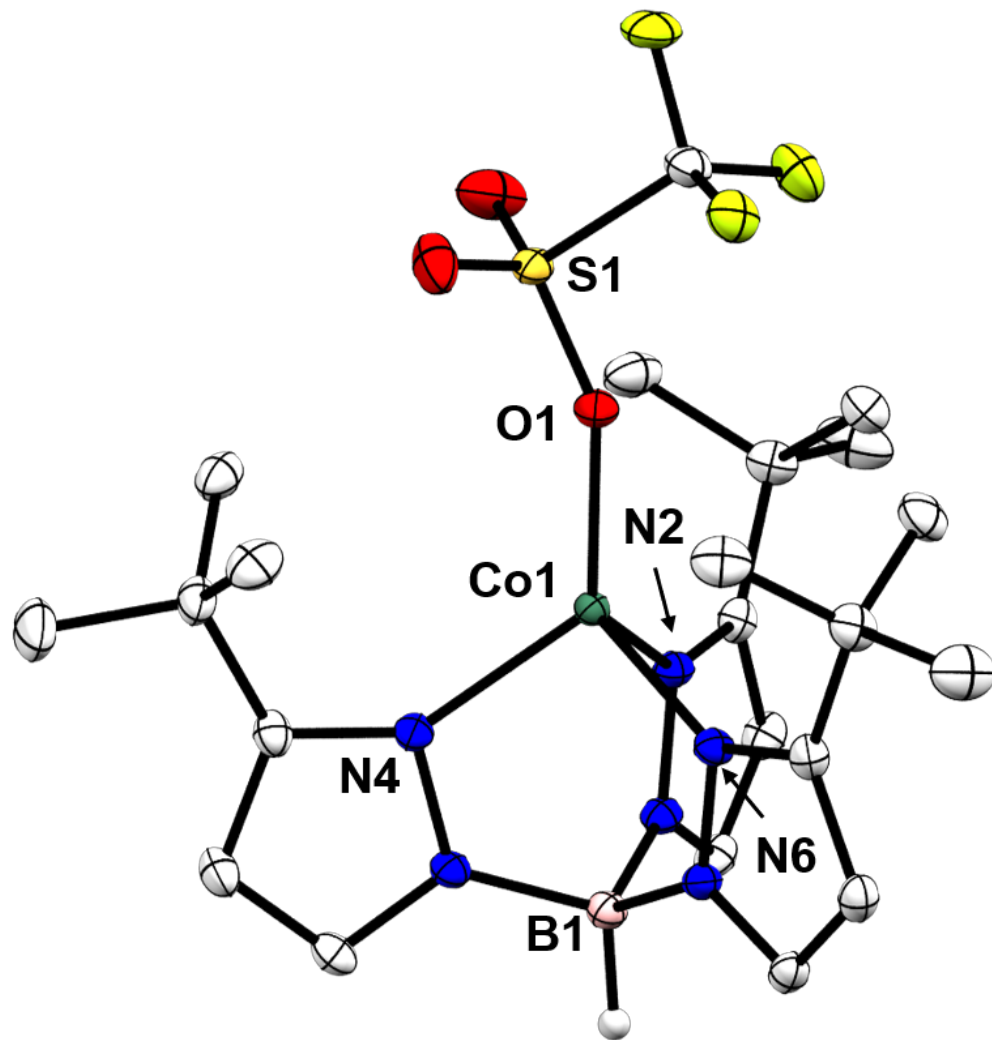

**Figure S43.** Depiction of the molecular structure of **5** determined by X-ray diffraction. Thermal ellipsoids shown at 50% probability. H-atoms other than B-H and a Et<sub>2</sub>O molecule have been omitted for clarity.

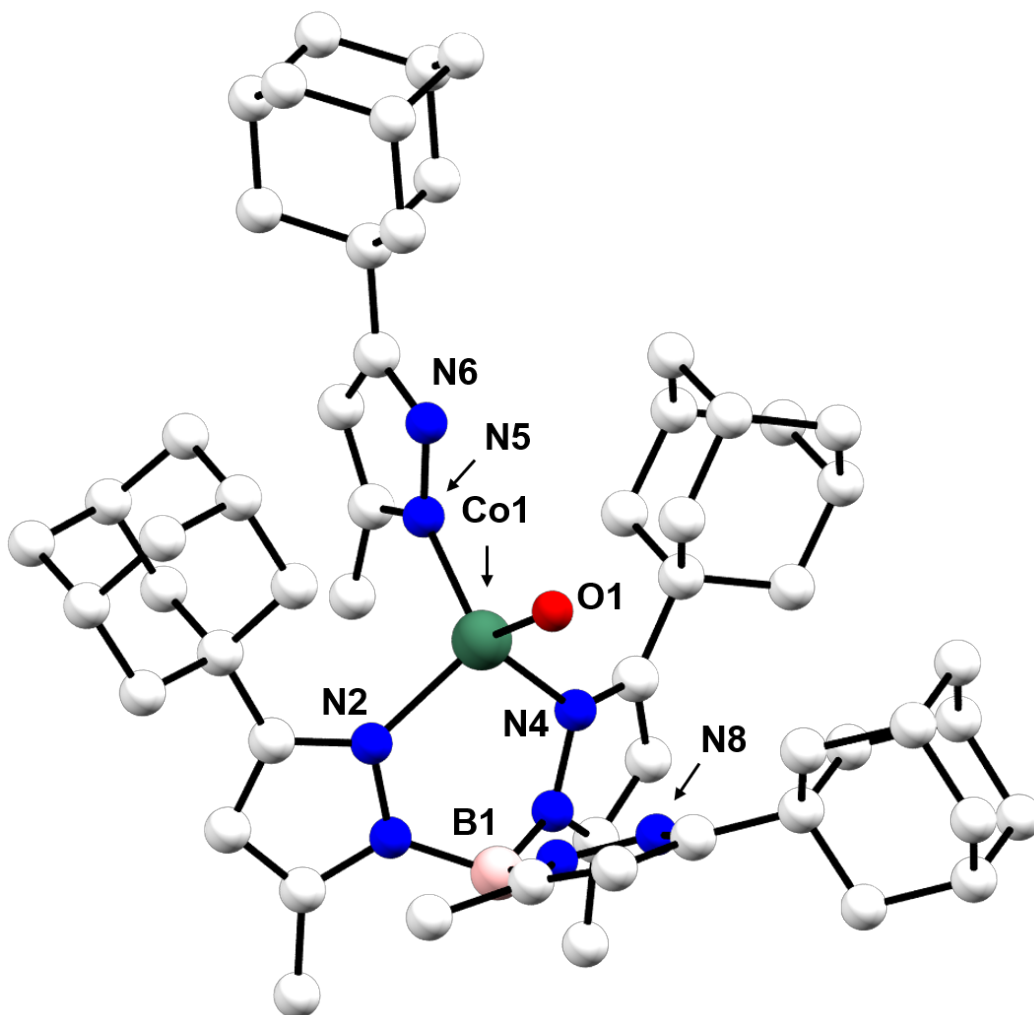

**Figure S44.** Depiction of the molecular structure of **6** determined by X-ray diffraction. Shown as ball and stick model for connectivity only. Atom labeled O1 is from coordinated OTf. The H-atoms, disordered Et<sub>2</sub>O solvent molecule, and BAr<sup>F</sup><sub>4</sub> counter ion omitted for clarity.

### 4.3 Metrical Parameters

**Table S5:** Selected bond distances and angles for the Co complexes reported.

| <b>Complex:</b>        | <b>1</b> | <b>2</b> | <b>3</b> | <b>4</b>  | <b>5</b>  | <b>6</b> |
|------------------------|----------|----------|----------|-----------|-----------|----------|
| <b>Bond Length (Å)</b> |          |          |          |           |           |          |
| Co1-N <sub>avg</sub>   | 2.037    | 2.032    | 2.026    | 2.038     | 2.016     | 2.027    |
| Co1-O1                 | 1.920(6) | 1.934(3) | 1.925(3) | 1.955(1)  | 1.948(1)  | 1.994(2) |
| I1-O1                  | 1.878(6) | 1.891(3) | 1.814(3) | N/A       | N/A       | N/A      |
| I1-O4                  | N/A      | N/A      | 1.780(3) | N/A       | N/A       | N/A      |
| <b>Angle (°)</b>       |          |          |          |           |           |          |
| B1-Co1-O1              | 160.4(3) | 171.6(1) | 173.7(1) | 161.11(5) | 175.59(4) | 107.1(2) |

#### 4.4 Refinement Details

**Table S6. Crystal data and structure refinement for 1.**

|                                             |                                                                                                                                                               |
|---------------------------------------------|---------------------------------------------------------------------------------------------------------------------------------------------------------------|
| Identification code                         | 1                                                                                                                                                             |
| Empirical formula                           | C <sub>169</sub> H <sub>168</sub> B <sub>4</sub> Cl <sub>2</sub> Co <sub>2</sub> F <sub>48</sub> I <sub>2</sub> N <sub>12</sub> O <sub>6</sub> S <sub>2</sub> |
| Formula weight                              | 3925.06                                                                                                                                                       |
| Temperature/K                               | 100(2)                                                                                                                                                        |
| Crystal system                              | triclinic                                                                                                                                                     |
| Space group                                 | P-1                                                                                                                                                           |
| a/Å                                         | 14.2995(9)                                                                                                                                                    |
| b/Å                                         | 16.0821(11)                                                                                                                                                   |
| c/Å                                         | 38.551(3)                                                                                                                                                     |
| α/°                                         | 95.079(2)                                                                                                                                                     |
| β/°                                         | 97.357(2)                                                                                                                                                     |
| γ/°                                         | 97.863(2)                                                                                                                                                     |
| Volume/Å <sup>3</sup>                       | 8658.9(10)                                                                                                                                                    |
| Z                                           | 2                                                                                                                                                             |
| ρ <sub>calc</sub> /cm <sup>3</sup>          | 1.505                                                                                                                                                         |
| μ/mm <sup>-1</sup>                          | 0.713                                                                                                                                                         |
| F(000)                                      | 3984.0                                                                                                                                                        |
| Crystal size/mm <sup>3</sup>                | 0.33 × 0.24 × 0.12                                                                                                                                            |
| Radiation                                   | MoKα (λ = 0.71073)                                                                                                                                            |
| 2θ range for data collection/°              | 4.328 to 50.14                                                                                                                                                |
| Index ranges                                | -15 ≤ h ≤ 16, -19 ≤ k ≤ 18, -45 ≤ l ≤ 45                                                                                                                      |
| Reflections collected                       | 86794                                                                                                                                                         |
| Independent reflections                     | 29336 [R <sub>int</sub> = 0.1033, R <sub>sigma</sub> = 0.1379]                                                                                                |
| Data/restraints/parameters                  | 29336/363/2310                                                                                                                                                |
| Goodness-of-fit on F <sup>2</sup>           | 1.068                                                                                                                                                         |
| Final R indexes [I ≥ 2σ (I)]                | R <sub>1</sub> = 0.0887, wR <sub>2</sub> = 0.1610                                                                                                             |
| Final R indexes [all data]                  | R <sub>1</sub> = 0.1561, wR <sub>2</sub> = 0.1833                                                                                                             |
| Largest diff. peak/hole / e Å <sup>-3</sup> | 1.26/-0.94                                                                                                                                                    |

$$R_{\text{int}} = \frac{\sum |F_o^2 - \langle F_o^2 \rangle|}{\sum |F_o^2|}$$

$$R_1 = \frac{\sum ||F_o| - |F_c||}{\sum |F_o|}$$

$$wR_2 = \left[ \frac{\sum [w (F_o^2 - F_c^2)^2]}{\sum [w (F_o^2)^2]} \right]^{1/2}$$

$$\text{Goodness-of-fit} = \left[ \frac{\sum [w (F_o^2 - F_c^2)^2]}{(n-p)} \right]^{1/2}$$

n: number of independent reflections; p: number of refined parameters



**Table S7. Crystal data and structure refinement for 2.**

|                                             |                                                                                                   |
|---------------------------------------------|---------------------------------------------------------------------------------------------------|
| Identification code                         | 2                                                                                                 |
| Empirical formula                           | C <sub>63</sub> H <sub>59</sub> B <sub>2</sub> CoF <sub>24</sub> IN <sub>6</sub> O <sub>3</sub> S |
| Formula weight                              | 1643.67                                                                                           |
| Temperature/K                               | 100(2)                                                                                            |
| Crystal system                              | triclinic                                                                                         |
| Space group                                 | P1                                                                                                |
| a/Å                                         | 10.4248(7)                                                                                        |
| b/Å                                         | 12.9027(9)                                                                                        |
| c/Å                                         | 15.4799(11)                                                                                       |
| α/°                                         | 101.302(2)                                                                                        |
| β/°                                         | 105.089(2)                                                                                        |
| γ/°                                         | 113.446(2)                                                                                        |
| Volume/Å <sup>3</sup>                       | 1735.7(2)                                                                                         |
| Z                                           | 1                                                                                                 |
| ρ <sub>calc</sub> /cm <sup>3</sup>          | 1.572                                                                                             |
| μ/mm <sup>-1</sup>                          | 0.835                                                                                             |
| F(000)                                      | 825.0                                                                                             |
| Crystal size/mm <sup>3</sup>                | 0.25 × 0.15 × 0.05                                                                                |
| Radiation                                   | MoKα (λ = 0.71073)                                                                                |
| 2θ range for data collection/°              | 4.308 to 55.12                                                                                    |
| Index ranges                                | -13 ≤ h ≤ 13, -16 ≤ k ≤ 16, -20 ≤ l ≤ 20                                                          |
| Reflections collected                       | 49488                                                                                             |
| Independent reflections                     | 15013 [R <sub>int</sub> = 0.0272, R <sub>sigma</sub> = 0.0384]                                    |
| Data/restraints/parameters                  | 15013/3/926                                                                                       |
| Goodness-of-fit on F <sup>2</sup>           | 1.036                                                                                             |
| Final R indexes [I ≥ 2σ (I)]                | R <sub>1</sub> = 0.0256, wR <sub>2</sub> = 0.0518                                                 |
| Final R indexes [all data]                  | R <sub>1</sub> = 0.0290, wR <sub>2</sub> = 0.0528                                                 |
| Largest diff. peak/hole / e Å <sup>-3</sup> | 0.60/-0.38                                                                                        |
| Flack parameter                             | -0.012(3)                                                                                         |

$$R_{\text{int}} = \frac{\sum |F_o^2 - \langle F_o^2 \rangle|}{\sum |F_o^2|}$$

$$R_1 = \frac{\sum ||F_o| - |F_c||}{\sum |F_o|}$$

$$wR_2 = \left[ \frac{\sum [w (F_o^2 - F_c^2)^2]}{\sum [w (F_o^2)^2]} \right]^{1/2}$$

$$\text{Goodness-of-fit} = \left[ \frac{\sum [w (F_o^2 - F_c^2)^2]}{(n-p)} \right]^{1/2}$$

n: number of independent reflections; p: number of refined parameters

**Table S8. Crystal data and structure refinement for 3.**

|                                             |                                                                                                   |
|---------------------------------------------|---------------------------------------------------------------------------------------------------|
| Identification code                         | 3                                                                                                 |
| Empirical formula                           | C <sub>71</sub> H <sub>77</sub> B <sub>2</sub> CoF <sub>24</sub> IN <sub>6</sub> O <sub>6</sub> S |
| Formula weight                              | 1805.89                                                                                           |
| Temperature/K                               | 100(2)                                                                                            |
| Crystal system                              | triclinic                                                                                         |
| Space group                                 | P-1                                                                                               |
| a/Å                                         | 13.018(3)                                                                                         |
| b/Å                                         | 17.299(4)                                                                                         |
| c/Å                                         | 19.933(4)                                                                                         |
| α/°                                         | 69.338(4)                                                                                         |
| β/°                                         | 77.588(5)                                                                                         |
| γ/°                                         | 78.279(5)                                                                                         |
| Volume/Å <sup>3</sup>                       | 4062.0(14)                                                                                        |
| Z                                           | 2                                                                                                 |
| ρ <sub>calc</sub> /cm <sup>3</sup>          | 1.477                                                                                             |
| μ/mm <sup>-1</sup>                          | 0.178                                                                                             |
| F(000)                                      | 1830.0                                                                                            |
| Crystal size/mm <sup>3</sup>                | 0.004 × 0.003 × 0.003                                                                             |
| Radiation                                   | synchrotron (λ = 0.41328)                                                                         |
| 2θ range for data collection/°              | 1.478 to 32.428                                                                                   |
| Index ranges                                | -17 ≤ h ≤ 17, -23 ≤ k ≤ 23, -26 ≤ l ≤ 26                                                          |
| Reflections collected                       | 114410                                                                                            |
| Independent reflections                     | 19783 [R <sub>int</sub> = 0.0498, R <sub>sigma</sub> = 0.0327]                                    |
| Data/restraints/parameters                  | 19783/136/1055                                                                                    |
| Goodness-of-fit on F <sup>2</sup>           | 1.022                                                                                             |
| Final R indexes [I ≥ 2σ (I)]                | R <sub>1</sub> = 0.0624, wR <sub>2</sub> = 0.1946                                                 |
| Final R indexes [all data]                  | R <sub>1</sub> = 0.0670, wR <sub>2</sub> = 0.1990                                                 |
| Largest diff. peak/hole / e Å <sup>-3</sup> | 2.23/-2.11                                                                                        |

$$R_{\text{int}} = \frac{\sum |F_o^2 - \langle F_o^2 \rangle|}{\sum |F_o^2|}$$

$$R_1 = \frac{\sum ||F_o| - |F_c||}{\sum |F_o|}$$

$$wR_2 = \left[ \frac{\sum [w (F_o^2 - F_c^2)^2]}{\sum [w (F_o^2)^2]} \right]^{1/2}$$

$$\text{Goodness-of-fit} = \left[ \frac{\sum [w (F_o^2 - F_c^2)^2]}{(n-p)} \right]^{1/2}$$

n: number of independent reflections; p: number of refined parameters

**Table S9. Crystal data and structure refinement for 4.**

|                                             |                                                                                   |
|---------------------------------------------|-----------------------------------------------------------------------------------|
| Identification code                         | 4                                                                                 |
| Empirical formula                           | C <sub>43</sub> H <sub>58</sub> BCoF <sub>3</sub> N <sub>6</sub> O <sub>3</sub> S |
| Formula weight                              | 865.75                                                                            |
| Temperature/K                               | 100(2)                                                                            |
| Crystal system                              | triclinic                                                                         |
| Space group                                 | P-1                                                                               |
| a/Å                                         | 11.3925(6)                                                                        |
| b/Å                                         | 16.9868(8)                                                                        |
| c/Å                                         | 21.7195(11)                                                                       |
| α/°                                         | 94.871(2)                                                                         |
| β/°                                         | 98.674(2)                                                                         |
| γ/°                                         | 92.305(2)                                                                         |
| Volume/Å <sup>3</sup>                       | 4134.1(4)                                                                         |
| Z                                           | 4                                                                                 |
| ρ <sub>calc</sub> /cm <sup>3</sup>          | 1.391                                                                             |
| μ/mm <sup>-1</sup>                          | 0.527                                                                             |
| F(000)                                      | 1828.0                                                                            |
| Crystal size/mm <sup>3</sup>                | 0.36 × 0.22 × 0.15                                                                |
| Radiation                                   | MoKα (λ = 0.71073)                                                                |
| 2θ range for data collection/°              | 4.242 to 56.798                                                                   |
| Index ranges                                | -15 ≤ h ≤ 15, -22 ≤ k ≤ 22, -29 ≤ l ≤ 29                                          |
| Reflections collected                       | 183013                                                                            |
| Independent reflections                     | 20681 [R <sub>int</sub> = 0.0466, R <sub>sigma</sub> = 0.0279]                    |
| Data/restraints/parameters                  | 20681/0/1057                                                                      |
| Goodness-of-fit on F <sup>2</sup>           | 1.030                                                                             |
| Final R indexes [I ≥ 2σ (I)]                | R <sub>1</sub> = 0.0411, wR <sub>2</sub> = 0.0979                                 |
| Final R indexes [all data]                  | R <sub>1</sub> = 0.0646, wR <sub>2</sub> = 0.1106                                 |
| Largest diff. peak/hole / e Å <sup>-3</sup> | 0.77/-0.43                                                                        |

$$R_{\text{int}} = \frac{\sum |F_o^2 - \langle F_o^2 \rangle|}{\sum |F_o^2|}$$

$$R_1 = \frac{\sum ||F_o| - |F_c||}{\sum |F_o|}$$

$$wR_2 = \left[ \frac{\sum [w (F_o^2 - F_c^2)^2]}{\sum [w (F_o^2)^2]} \right]^{1/2}$$

$$\text{Goodness-of-fit} = \left[ \frac{\sum [w (F_o^2 - F_c^2)^2]}{(n-p)} \right]^{1/2}$$

n: number of independent reflections; p: number of refined parameters

**Table S10. Crystal data and structure refinement for 5.**

|                                             |                                                                                   |
|---------------------------------------------|-----------------------------------------------------------------------------------|
| Identification code                         | 5                                                                                 |
| Empirical formula                           | C <sub>26</sub> H <sub>44</sub> BCoF <sub>3</sub> N <sub>6</sub> O <sub>4</sub> S |
| Formula weight                              | 663.47                                                                            |
| Temperature/K                               | 100(2)                                                                            |
| Crystal system                              | monoclinic                                                                        |
| Space group                                 | P2 <sub>1</sub> /n                                                                |
| a/Å                                         | 10.4361(10)                                                                       |
| b/Å                                         | 20.2414(18)                                                                       |
| c/Å                                         | 15.3862(14)                                                                       |
| α/°                                         | 90                                                                                |
| β/°                                         | 91.209(3)                                                                         |
| γ/°                                         | 90                                                                                |
| Volume/Å <sup>3</sup>                       | 3249.5(5)                                                                         |
| Z                                           | 4                                                                                 |
| ρ <sub>calc</sub> /cm <sup>3</sup>          | 1.356                                                                             |
| μ/mm <sup>-1</sup>                          | 0.650                                                                             |
| F(000)                                      | 1396.0                                                                            |
| Crystal size/mm <sup>3</sup>                | 0.45 × 0.3 × 0.1                                                                  |
| Radiation                                   | MoKα (λ = 0.71073)                                                                |
| 2θ range for data collection/°              | 4.392 to 55.17                                                                    |
| Index ranges                                | -11 ≤ h ≤ 13, -26 ≤ k ≤ 26, -20 ≤ l ≤ 20                                          |
| Reflections collected                       | 100848                                                                            |
| Independent reflections                     | 7508 [R <sub>int</sub> = 0.0403, R <sub>sigma</sub> = 0.0171]                     |
| Data/restraints/parameters                  | 7508/0/394                                                                        |
| Goodness-of-fit on F <sup>2</sup>           | 1.045                                                                             |
| Final R indexes [I ≥ 2σ (I)]                | R <sub>1</sub> = 0.0277, wR <sub>2</sub> = 0.0648                                 |
| Final R indexes [all data]                  | R <sub>1</sub> = 0.0337, wR <sub>2</sub> = 0.0673                                 |
| Largest diff. peak/hole / e Å <sup>-3</sup> | 0.44/-0.32                                                                        |

$$R_{\text{int}} = \frac{\sum |F_o^2 - \langle F_o^2 \rangle|}{\sum |F_o^2|}$$

$$R_1 = \frac{\sum ||F_o| - |F_c||}{\sum |F_o|}$$

$$wR_2 = \left[ \frac{\sum [w (F_o^2 - F_c^2)^2]}{\sum [w (F_o^2)^2]} \right]^{1/2}$$

$$\text{Goodness-of-fit} = \left[ \frac{\sum [w (F_o^2 - F_c^2)^2]}{(n-p)} \right]^{1/2}$$

n: number of independent reflections; p: number of refined parameters

**Table S11. Crystal data and structure refinement for 6.**

|                                             |                                                                                                   |
|---------------------------------------------|---------------------------------------------------------------------------------------------------|
| Identification code                         | 6                                                                                                 |
| Empirical formula                           | C <sub>93</sub> H <sub>100</sub> B <sub>2</sub> CoF <sub>27</sub> N <sub>8</sub> O <sub>4</sub> S |
| Formula weight                              | 2019.41                                                                                           |
| Temperature/K                               | 100(2)                                                                                            |
| Crystal system                              | orthorhombic                                                                                      |
| Space group                                 | Pbca                                                                                              |
| a/Å                                         | 21.4930(17)                                                                                       |
| b/Å                                         | 22.3378(19)                                                                                       |
| c/Å                                         | 38.715(3)                                                                                         |
| α/°                                         | 90                                                                                                |
| β/°                                         | 90                                                                                                |
| γ/°                                         | 90                                                                                                |
| Volume/Å <sup>3</sup>                       | 18587(3)                                                                                          |
| Z                                           | 8                                                                                                 |
| ρ <sub>calc</sub> /cm <sup>3</sup>          | 1.443                                                                                             |
| μ/mm <sup>-1</sup>                          | 0.317                                                                                             |
| F(000)                                      | 8336.0                                                                                            |
| Crystal size/mm <sup>3</sup>                | 0.35 × 0.15 × 0.1                                                                                 |
| Radiation                                   | MoKα (λ = 0.71073)                                                                                |
| 2θ range for data collection/°              | 4.206 to 49.632                                                                                   |
| Index ranges                                | -25 ≤ h ≤ 25, -26 ≤ k ≤ 26, -45 ≤ l ≤ 45                                                          |
| Reflections collected                       | 251224                                                                                            |
| Independent reflections                     | 16006 [R <sub>int</sub> = 0.1273, R <sub>sigma</sub> = 0.0598]                                    |
| Data/restraints/parameters                  | 16006/58/1213                                                                                     |
| Goodness-of-fit on F <sup>2</sup>           | 1.023                                                                                             |
| Final R indexes [I ≥ 2σ (I)]                | R <sub>1</sub> = 0.1073, wR <sub>2</sub> = 0.2609                                                 |
| Final R indexes [all data]                  | R <sub>1</sub> = 0.1568, wR <sub>2</sub> = 0.2964                                                 |
| Largest diff. peak/hole / e Å <sup>-3</sup> | 2.92/-2.37                                                                                        |

$$R_{\text{int}} = \frac{\sum |F_o^2 - \langle F_o^2 \rangle|}{\sum |F_o^2|}$$

$$R_1 = \frac{\sum ||F_o| - |F_c||}{\sum |F_o|}$$

$$wR_2 = \left[ \frac{\sum [w (F_o^2 - F_c^2)^2]}{\sum [w (F_o^2)^2]} \right]^{1/2}$$

$$\text{Goodness-of-fit} = \left[ \frac{\sum [w (F_o^2 - F_c^2)^2]}{(n-p)} \right]^{1/2}$$

n: number of independent reflections; p: number of refined parameters

## 5.0 References

- [1] D. Macikenas, E. Skrzypczak-Jankun, J. D. Protasiewicz, *J. Am. Chem. Soc.* **1999**, *121*, 7164–7165.
- [2] F. Song, C. Wang, J. M. Falkowski, L. Ma, W. Lin, *J. Am. Chem. Soc.* **2010**, *132*, 15390–15398.
- [3] R. J. Angelici, Ed. , *Inorganic Syntheses*, John Wiley & Sons, Inc., Hoboken, NJ, USA, **1990**.
- [4] C. Goldsmith, R. Jonas, T. Stack, *J. Am. Chem. Soc.* **2002**, *124*, 83–96.
- [5] A. McSkimming, W. H. Harman, *J. Am. Chem. Soc.* **2015**, *137*, 8940–8943.
- [6] N. Chakrabarti, W. Sattler, G. Parkin, *Polyhedron* **2013**, *58*, 235–246.
- [7] D. Macikenas, E. Skrzypczak-Jankun, J. D. Protasiewicz, *Angew. Chem. Int. Ed.* **2000**, *39*, 2007–2010.
- [8] L. Krause, R. Herbst-Irmer, G. M. Sheldrick, D. Stalke, *J. Appl. Crystallogr.* **2015**, *48*, 3–10.
- [9] G. M. Sheldrick, *Acta Crystallogr.* **2015**, *A71*, 3–8.
- [10] O. V. Dolomanov, L. J. Bourhis, R. J. Gildea, J. A. K. Howard, H. Puschmann, *J. Appl. Crystallogr.* **2009**, *42*, 339–341.
- [11] G. M. Sheldrick, *Acta Crystallogr.* **2015**, *C71*, 3–8.
